# Supplementary material for: Expanding the chemical diversity of an endophytic fungusBulgaria inquinans, an ascomycete associated with mistletoe, through an OSMAC approach
Source: Royal Society of Chemistry journal article supplement (doi:10.1039/c9ra03678d), 2019-01-01
Supplement: c9ra03678d1.pdf [file c9ra03678d1.pdf]

## Supporting Information

### Expanding the Chemical Diversity of an Endophytic Fungus *Bulgaria inquinans*, an Ascomycete Associated with Mistletoe, through OSMAC Approach

Ni P. Ariantari,<sup>ab</sup> Georgios Daletos,<sup>a</sup> Attila Mándi,<sup>c</sup> Tibor Kurtán,<sup>c</sup> Werner E. G. Müller,<sup>d</sup>  
Wenhan Lin,<sup>e</sup> Elena Ancheeva,<sup>\*a</sup> Peter Proksch<sup>\*a</sup>

<sup>a</sup>Institute of Pharmaceutical Biology and Biotechnology, Heinrich Heine University  
Düsseldorf, Universitätsstrasse 1, 40225 Düsseldorf, Germany

<sup>b</sup>Department of Pharmacy, Faculty of Mathematic and Natural Sciences, Udayana University,  
80361 Bali, Indonesia

<sup>c</sup>Department of Organic Chemistry, University of Debrecen, P.O.B. 400, 4002 Debrecen,  
Hungary

<sup>d</sup>Institute of Physiological Chemistry, Universitätsmedizin der Johannes Gutenberg-  
Universität Mainz, Duesbergweg 6, 55128 Mainz, Germany

<sup>e</sup>State Key Laboratory of Natural and Biomimetic Drugs, Peking University, 100191 Beijing,  
China

\*Corresponding author

## Table of Contents

|                                                                                                                                                                                                                                                                                                              | Page |
|--------------------------------------------------------------------------------------------------------------------------------------------------------------------------------------------------------------------------------------------------------------------------------------------------------------|------|
| <b>Figure S1.</b> HPLC chromatograms of EtOAc extract of <i>B. inquinans</i> (isolate MSp3-1) cultured on solid Czapek medium (black) compared to the OSMAC culture on solid Czapek medium with addition of a mixture of MgSO <sub>4</sub> , NaNO <sub>3</sub> and NaCl (blue) under UV detection at 280 nm. | 5    |
| <b>Figure S2.</b> HPLC chromatogram (A) and UV spectrum (B) of compound <b>1</b> .                                                                                                                                                                                                                           | 6    |
| <b>Figure S3.</b> HRESIMS spectrum of compound <b>1</b> .                                                                                                                                                                                                                                                    | 6    |
| <b>Figure S4.</b> <sup>1</sup> H NMR (600 MHz, MeOH- <i>d</i> <sub>4</sub> ) spectrum of compound <b>1</b> .                                                                                                                                                                                                 | 7    |
| <b>Figure S5.</b> <sup>13</sup> C NMR (150 MHz, MeOH- <i>d</i> <sub>4</sub> ) spectrum of compound <b>1</b> .                                                                                                                                                                                                | 7    |
| <b>Figure S6.</b> <sup>1</sup> H- <sup>1</sup> H COSY (600 MHz, MeOH- <i>d</i> <sub>4</sub> ) spectrum of compound <b>1</b> .                                                                                                                                                                                | 8    |
| <b>Figure S7.</b> HSQC (600 and 150 MHz, MeOH- <i>d</i> <sub>4</sub> ) spectrum of compound <b>1</b> .                                                                                                                                                                                                       | 8    |
| <b>Figure S8.</b> HMBC (600 and 150 MHz, MeOH- <i>d</i> <sub>4</sub> ) spectrum of compound <b>1</b> .                                                                                                                                                                                                       | 9    |
| <b>Figure S9.</b> NOESY (600 MHz, MeOH- <i>d</i> <sub>4</sub> ) spectrum of compound <b>1</b> .                                                                                                                                                                                                              | 9    |
| <b>Figure S10.</b> HPLC chromatogram (A) and UV spectrum (B) of compound <b>2</b> .                                                                                                                                                                                                                          | 10   |
| <b>Figure S11.</b> HRESIMS spectrum of compound <b>2</b> .                                                                                                                                                                                                                                                   | 10   |
| <b>Figure S12.</b> <sup>1</sup> H NMR (600 MHz, MeOH- <i>d</i> <sub>4</sub> ) spectrum of compound <b>2</b> .                                                                                                                                                                                                | 11   |
| <b>Figure S13.</b> <sup>13</sup> C NMR (150 MHz, MeOH- <i>d</i> <sub>4</sub> ) spectrum of compound <b>2</b> .                                                                                                                                                                                               | 11   |
| <b>Figure S14.</b> <sup>1</sup> H- <sup>1</sup> H COSY (600 MHz, MeOH- <i>d</i> <sub>4</sub> ) spectrum of compound <b>2</b> .                                                                                                                                                                               | 12   |
| <b>Figure S15.</b> HSQC (600 and 150 MHz, MeOH- <i>d</i> <sub>4</sub> ) spectrum of compound <b>2</b> .                                                                                                                                                                                                      | 12   |
| <b>Figure S16.</b> HMBC (600 and 150 MHz, MeOH- <i>d</i> <sub>4</sub> ) spectrum of compound <b>2</b> .                                                                                                                                                                                                      | 13   |
| <b>Figure S17.</b> HPLC chromatogram (A) and UV spectrum (B) of compound <b>3</b> .                                                                                                                                                                                                                          | 13   |
| <b>Figure S18.</b> HRESIMS spectrum of compound <b>3</b> .                                                                                                                                                                                                                                                   | 14   |
| <b>Figure S19.</b> <sup>1</sup> H NMR (600 MHz, MeOH- <i>d</i> <sub>4</sub> ) spectrum of compound <b>3</b> .                                                                                                                                                                                                | 14   |
| <b>Figure S20.</b> <sup>13</sup> C NMR (150 MHz, MeOH- <i>d</i> <sub>4</sub> ) spectrum of compound <b>3</b> .                                                                                                                                                                                               | 15   |
| <b>Figure S21.</b> <sup>1</sup> H- <sup>1</sup> H COSY (600 MHz, MeOH- <i>d</i> <sub>4</sub> ) spectrum of compound <b>3</b> .                                                                                                                                                                               | 15   |
| <b>Figure S22.</b> HSQC (600 and 150 MHz, MeOH- <i>d</i> <sub>4</sub> ) spectrum of compound <b>3</b> .                                                                                                                                                                                                      | 16   |
| <b>Figure S23.</b> HMBC (600 and 150 MHz, MeOH- <i>d</i> <sub>4</sub> ) spectrum of compound <b>3</b> .                                                                                                                                                                                                      | 16   |
| <b>Figure S24.</b> NOESY (600 MHz, MeOH- <i>d</i> <sub>4</sub> ) spectrum of compound <b>3</b> .                                                                                                                                                                                                             | 17   |
| <b>Figure S25.</b> HPLC chromatogram (A) and UV spectrum (B) of compound <b>4</b> .                                                                                                                                                                                                                          | 17   |
| <b>Figure S26.</b> HRESIMS spectrum of compound <b>4</b> .                                                                                                                                                                                                                                                   | 18   |
| <b>Figure S27.</b> <sup>1</sup> H NMR (600 MHz, MeOH- <i>d</i> <sub>4</sub> ) spectrum of compound <b>4</b> .                                                                                                                                                                                                | 18   |
| <b>Figure S28.</b> <sup>13</sup> C NMR (150 MHz, MeOH- <i>d</i> <sub>4</sub> ) spectrum of compound <b>4</b> .                                                                                                                                                                                               | 19   |
| <b>Figure S29.</b> <sup>1</sup> H- <sup>1</sup> H COSY (600 MHz, MeOH- <i>d</i> <sub>4</sub> ) spectrum of compound <b>4</b> .                                                                                                                                                                               | 19   |
| <b>Figure S30.</b> HSQC (300 and 75 MHz, MeOH- <i>d</i> <sub>4</sub> ) spectrum of compound <b>4</b> .                                                                                                                                                                                                       | 20   |
| <b>Figure S31.</b> HMBC (300 and 75 MHz, MeOH- <i>d</i> <sub>4</sub> ) spectrum of compound <b>4</b> .                                                                                                                                                                                                       | 20   |
| <b>Figure S32.</b> HPLC chromatogram (A) and UV spectrum (B) of compound <b>5</b> .                                                                                                                                                                                                                          | 21   |
| <b>Figure S33.</b> HRESIMS spectrum of compound <b>5</b> .                                                                                                                                                                                                                                                   | 21   |
| <b>Figure S34.</b> <sup>1</sup> H NMR (600 MHz, MeOH- <i>d</i> <sub>4</sub> ) spectrum of compound <b>5</b> .                                                                                                                                                                                                | 22   |
| <b>Figure S35.</b> <sup>13</sup> C NMR (150 MHz, MeOH- <i>d</i> <sub>4</sub> ) spectrum of compound <b>5</b> .                                                                                                                                                                                               | 22   |
| <b>Figure S36.</b> <sup>1</sup> H- <sup>1</sup> H COSY (300 MHz, MeOH- <i>d</i> <sub>4</sub> ) spectrum of compound <b>5</b> .                                                                                                                                                                               | 23   |
| <b>Figure S37.</b> HSQC (300 and 75 MHz, MeOH- <i>d</i> <sub>4</sub> ) spectrum of compound <b>5</b> .                                                                                                                                                                                                       | 23   |
| <b>Figure S38.</b> HMBC (600 and 150 MHz, MeOH- <i>d</i> <sub>4</sub> ) spectrum of compound <b>5</b> .                                                                                                                                                                                                      | 24   |
| <b>Figure S39.</b> NOESY (600 MHz, MeOH- <i>d</i> <sub>4</sub> ) spectrum of compound <b>5</b> .                                                                                                                                                                                                             | 24   |
| <b>Figure S40.</b> HPLC chromatogram (A) and UV spectrum (B) of compound <b>6</b> .                                                                                                                                                                                                                          | 25   |
| <b>Figure S41.</b> HRESIMS spectrum of compound <b>6</b> .                                                                                                                                                                                                                                                   | 25   |
| <b>Figure S42.</b> <sup>1</sup> H NMR (600 MHz, MeOH- <i>d</i> <sub>4</sub> ) spectrum of compound <b>6</b> .                                                                                                                                                                                                | 26   |
| <b>Figure S43.</b> <sup>13</sup> C NMR (150 MHz, MeOH- <i>d</i> <sub>4</sub> ) spectrum of compound <b>6</b> .                                                                                                                                                                                               | 26   |
| <b>Figure S44.</b> <sup>1</sup> H- <sup>1</sup> H COSY (600 MHz, MeOH- <i>d</i> <sub>4</sub> ) spectrum of compound <b>6</b> .                                                                                                                                                                               | 27   |

|                                                                                                                                 |    |
|---------------------------------------------------------------------------------------------------------------------------------|----|
| <b>Figure S45.</b> HSQC (600 and 150 MHz, MeOH- <i>d</i> <sub>4</sub> ) spectrum of compound <b>6</b> .                         | 27 |
| <b>Figure S46.</b> HMBC (600 and 150 MHz, MeOH- <i>d</i> <sub>4</sub> ) spectrum of compound <b>6</b> .                         | 28 |
| <b>Figure S47.</b> HPLC chromatogram (A) and UV spectrum (B) of compound <b>7</b> .                                             | 28 |
| <b>Figure S48.</b> HRESIMS spectrum of compound <b>7</b> .                                                                      | 29 |
| <b>Figure S49.</b> <sup>1</sup> H NMR (600 MHz, MeOH- <i>d</i> <sub>4</sub> ) spectrum of compound <b>7</b> .                   | 29 |
| <b>Figure S50.</b> <sup>13</sup> C NMR (150 MHz, MeOH- <i>d</i> <sub>4</sub> ) spectrum of compound <b>7</b> .                  | 30 |
| <b>Figure S51.</b> <sup>1</sup> H- <sup>1</sup> H COSY (600 MHz, MeOH- <i>d</i> <sub>4</sub> ) spectrum of compound <b>7</b> .  | 30 |
| <b>Figure S52.</b> HSQC (600 and 150 MHz, MeOH- <i>d</i> <sub>4</sub> ) spectrum of compound <b>7</b> .                         | 31 |
| <b>Figure S53.</b> HMBC (600 and 150 MHz, MeOH- <i>d</i> <sub>4</sub> ) spectrum of compound <b>7</b> .                         | 31 |
| <b>Figure S54.</b> HPLC chromatogram (A) and UV spectrum (B) of compound <b>8</b> .                                             | 32 |
| <b>Figure S55.</b> HRESIMS spectrum of compound <b>8</b> .                                                                      | 32 |
| <b>Figure S56.</b> <sup>1</sup> H NMR (600 MHz, MeOH- <i>d</i> <sub>4</sub> ) spectrum of compound <b>8</b> .                   | 33 |
| <b>Figure S57.</b> <sup>1</sup> H- <sup>1</sup> H COSY (600 MHz, MeOH- <i>d</i> <sub>4</sub> ) spectrum of compound <b>8</b> .  | 33 |
| <b>Figure S58.</b> HSQC (600 and 150 MHz, MeOH- <i>d</i> <sub>4</sub> ) spectrum of compound <b>8</b> .                         | 34 |
| <b>Figure S59.</b> HMBC (600 and 150 MHz, MeOH- <i>d</i> <sub>4</sub> ) spectrum of compound <b>8</b> .                         | 34 |
| <b>Figure S60.</b> HPLC chromatogram (A) and UV spectrum (B) of compound <b>9</b> .                                             | 35 |
| <b>Figure S61.</b> HRESIMS spectrum of compound <b>9</b> .                                                                      | 35 |
| <b>Figure S62.</b> <sup>1</sup> H NMR (600 MHz, MeOH- <i>d</i> <sub>4</sub> ) spectrum of compound <b>9</b> .                   | 36 |
| <b>Figure S63.</b> <sup>1</sup> H- <sup>1</sup> H COSY (600 MHz, MeOH- <i>d</i> <sub>4</sub> ) spectrum of compound <b>9</b> .  | 36 |
| <b>Figure S64.</b> HSQC (600 and 150 MHz, MeOH- <i>d</i> <sub>4</sub> ) spectrum of compound <b>9</b> .                         | 37 |
| <b>Figure S65.</b> HMBC (600 and 150 MHz, MeOH- <i>d</i> <sub>4</sub> ) spectrum of compound <b>9</b> .                         | 37 |
| <b>Figure S66.</b> HPLC chromatogram (A) and UV spectrum (B) of compound <b>10</b> .                                            | 38 |
| <b>Figure S67.</b> HRESIMS spectrum of compound <b>10</b> .                                                                     | 38 |
| <b>Figure S68.</b> <sup>1</sup> H NMR (600 MHz, MeOH- <i>d</i> <sub>4</sub> ) spectrum of compound <b>10</b> .                  | 39 |
| <b>Figure S69.</b> <sup>13</sup> C NMR (150 MHz, MeOH- <i>d</i> <sub>4</sub> ) spectrum of compound <b>10</b> .                 | 39 |
| <b>Figure S70.</b> <sup>1</sup> H- <sup>1</sup> H COSY (600 MHz, MeOH- <i>d</i> <sub>4</sub> ) spectrum of compound <b>10</b> . | 40 |
| <b>Figure S71.</b> HSQC (600 and 150 MHz, MeOH- <i>d</i> <sub>4</sub> ) spectrum of compound <b>10</b> .                        | 40 |
| <b>Figure S72.</b> HMBC (600 and 150 MHz, MeOH- <i>d</i> <sub>4</sub> ) spectrum of compound <b>10</b> .                        | 41 |
| <b>Figure S73.</b> HPLC chromatogram (A) and UV spectrum (B) of compound <b>11</b> .                                            | 41 |
| <b>Figure S74.</b> HRESIMS spectrum of compound <b>11</b> .                                                                     | 42 |
| <b>Figure S75.</b> <sup>1</sup> H NMR (600 MHz, MeOH- <i>d</i> <sub>4</sub> ) spectrum of compound <b>11</b> .                  | 42 |
| <b>Figure S76.</b> <sup>13</sup> C NMR (150 MHz, MeOH- <i>d</i> <sub>4</sub> ) spectrum of compound <b>11</b> .                 | 43 |
| <b>Figure S77.</b> <sup>1</sup> H- <sup>1</sup> H COSY (600 MHz, MeOH- <i>d</i> <sub>4</sub> ) spectrum of compound <b>11</b> . | 43 |
| <b>Figure S78.</b> HSQC (600 and 150 MHz, MeOH- <i>d</i> <sub>4</sub> ) spectrum of compound <b>11</b> .                        | 44 |
| <b>Figure S79.</b> HMBC (600 and 150 MHz, MeOH- <i>d</i> <sub>4</sub> ) spectrum of compound <b>11</b> .                        | 44 |
| <b>Figure S80.</b> HPLC chromatogram (A) and UV spectrum (B) of compound <b>12</b> .                                            | 45 |
| <b>Figure S81.</b> HRESIMS spectrum of compound <b>12</b> .                                                                     | 45 |
| <b>Figure S82.</b> <sup>1</sup> H NMR (600 MHz, MeOH- <i>d</i> <sub>4</sub> ) spectrum of compound <b>12</b> .                  | 46 |
| <b>Figure S83.</b> <sup>13</sup> C NMR (150 MHz, MeOH- <i>d</i> <sub>4</sub> ) spectrum of compound <b>12</b> .                 | 46 |
| <b>Figure S84.</b> <sup>1</sup> H- <sup>1</sup> H COSY (600 MHz, MeOH- <i>d</i> <sub>4</sub> ) spectrum of compound <b>12</b> . | 47 |
| <b>Figure S85.</b> HSQC (600 and 150 MHz, MeOH- <i>d</i> <sub>4</sub> ) spectrum of compound <b>12</b> .                        | 47 |
| <b>Figure S86.</b> HMBC (600 and 150 MHz, MeOH- <i>d</i> <sub>4</sub> ) spectrum of compound <b>12</b> .                        | 48 |
| <b>Figure S87.</b> NOESY (300 MHz, MeOH- <i>d</i> <sub>4</sub> ) spectrum of compound <b>12</b> .                               | 48 |
| <b>Figure S88.</b> DEPT 135 (125 MHz, MeOH- <i>d</i> <sub>4</sub> ) spectrum of compound <b>12</b> .                            | 49 |
| <b>Figure S89.</b> HPLC chromatogram (A) and UV spectrum (B) of compound <b>13</b> .                                            | 49 |
| <b>Figure S90.</b> HRESIMS spectrum of compound <b>13</b> .                                                                     | 50 |
| <b>Figure S91.</b> <sup>1</sup> H NMR (600 MHz, MeOH- <i>d</i> <sub>4</sub> ) spectrum of compound <b>13</b> .                  | 50 |
| <b>Figure S92.</b> <sup>13</sup> C NMR (125 MHz, MeOH- <i>d</i> <sub>4</sub> ) spectrum of compound <b>13</b> .                 | 51 |
| <b>Figure S93.</b> <sup>1</sup> H- <sup>1</sup> H COSY (600 MHz, MeOH- <i>d</i> <sub>4</sub> ) spectrum of compound <b>13</b> . | 51 |
| <b>Figure S94.</b> HSQC (600 and 150 MHz, MeOH- <i>d</i> <sub>4</sub> ) spectrum of compound <b>13</b> .                        | 52 |
| <b>Figure S95.</b> HMBC (600 and 150 MHz, MeOH- <i>d</i> <sub>4</sub> ) spectrum of compound <b>13</b> .                        | 52 |

|                                                                                                                                                                                                                                                                                                                                                                                                  |    |
|--------------------------------------------------------------------------------------------------------------------------------------------------------------------------------------------------------------------------------------------------------------------------------------------------------------------------------------------------------------------------------------------------|----|
| <b>Figure S96.</b> NOESY (600 MHz, MeOH- <i>d</i> <sub>4</sub> ) spectrum of compound <b>13</b> .                                                                                                                                                                                                                                                                                                | 53 |
| <b>Figure S97.</b> HPLC chromatogram (A) and UV spectrum (B) of compound <b>16</b> .                                                                                                                                                                                                                                                                                                             | 53 |
| <b>Figure S98.</b> HRESIMS spectrum of compound <b>16</b> .                                                                                                                                                                                                                                                                                                                                      | 54 |
| <b>Figure S99.</b> <sup>1</sup> H NMR (600 MHz, MeOH- <i>d</i> <sub>4</sub> ) spectrum of compound <b>16</b> .                                                                                                                                                                                                                                                                                   | 54 |
| <b>Figure S100.</b> <sup>13</sup> C NMR (150 MHz, MeOH- <i>d</i> <sub>4</sub> ) spectrum of compound <b>16</b> .                                                                                                                                                                                                                                                                                 | 55 |
| <b>Figure S101.</b> <sup>1</sup> H- <sup>1</sup> H COSY (600 MHz, MeOH- <i>d</i> <sub>4</sub> ) spectrum of compound <b>16</b> .                                                                                                                                                                                                                                                                 | 55 |
| <b>Figure S102.</b> HSQC (600 and 150 MHz, MeOH- <i>d</i> <sub>4</sub> ) spectrum of compound <b>16</b> .                                                                                                                                                                                                                                                                                        | 56 |
| <b>Figure S103.</b> HMBC (600 and 150 MHz, MeOH- <i>d</i> <sub>4</sub> ) spectrum of compound <b>16</b> .                                                                                                                                                                                                                                                                                        | 56 |
| <b>Figure S104.</b> Structure and population of the low-energy CAM-B3LYP/TZVP PCM/MeCN conformers (≥ 1%) of ( <i>S</i> )- <b>1</b> .                                                                                                                                                                                                                                                             | 57 |
| <b>Figure S105.</b> Classification of the twenty-two low-energy (≥ 1%) CAM-B3LYP/TZVP PCM/MeCN conformers of ( <i>8R,9S</i> )- <b>4</b> . Group A (44.9%) contains conformers A, B, E, F; group B (27.5%) contains conformers C, D, G, H, K, L, Q, R; group C (10.1%) contains conformers I, J, M, N; group D (3.2%) contains conformers O, P; group E (4.4%) contains conformers S, T, U and V. | 57 |
| <b>Figure S106.</b> Experimental ECD spectrum (black) of <b>6</b> in MeCN compared with the Boltzmann-weighted PBE0/TZVP PCM/MeCN ECD spectrum (purple) of ( <i>R</i> )- <b>6</b> computed for the 6 low-energy CAM-B3LYP/TZVP PCM/MeCN conformers. The bars represent the rotational strength of the lowest-energy conformer.                                                                   | 58 |
| <b>Figure S107.</b> Classification of the twenty-six low-energy (≥ 1%) CAM-B3LYP/TZVP PCM/MeCN conformers of ( <i>3S,11S,23S</i> )- <b>14</b> into conformer groups. Group A (72.5%) contains conformers A, B, C, D, E, F, G, I, J, K, M, N, O, Q, R, S, T, U, V, W, Y, Z; group B (5.0%) contains conformers H, L, X; group C (1.6%) contains conformer P.                                      | 58 |

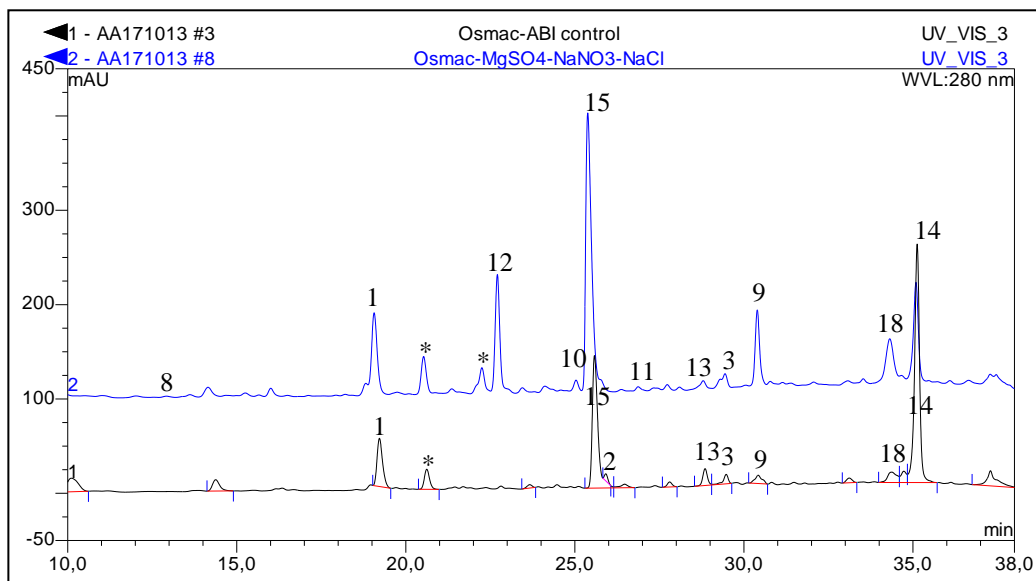

**Figure S1.** HPLC chromatograms of EtOAc extract of *B. inquinans* (isolate MSp3-1) cultured on solid Czapek medium (black) compared to the OSMAC culture on solid Czapek medium with addition of a mixture of MgSO<sub>4</sub>, NaNO<sub>3</sub> and NaCl (blue) under UV detection at 280 nm.

\*: unidentified peaks

Compounds **4**, **5**, **6**, **7**, **16** and xenofuranone B (**17**) were not detected neither in the HPLC analysis of the crude extract of *B. inquinans* (isolate MSp3-1) cultured on solid Czapek medium, nor in the HPLC analysis of the crude extract of the fungal culture with addition of a mixture of MgSO<sub>4</sub>, NaNO<sub>3</sub> and NaCl, perhaps due to their low amount and/or low UV absorption. However, compounds **6**, **7** and **16** were only obtained from chromatographic workup on OSMAC extract, while compound **4** and xenofuranone B (**17**) were only afforded from extract of fungal culture without salt mixture. Compound **5** was isolated from both extracts.

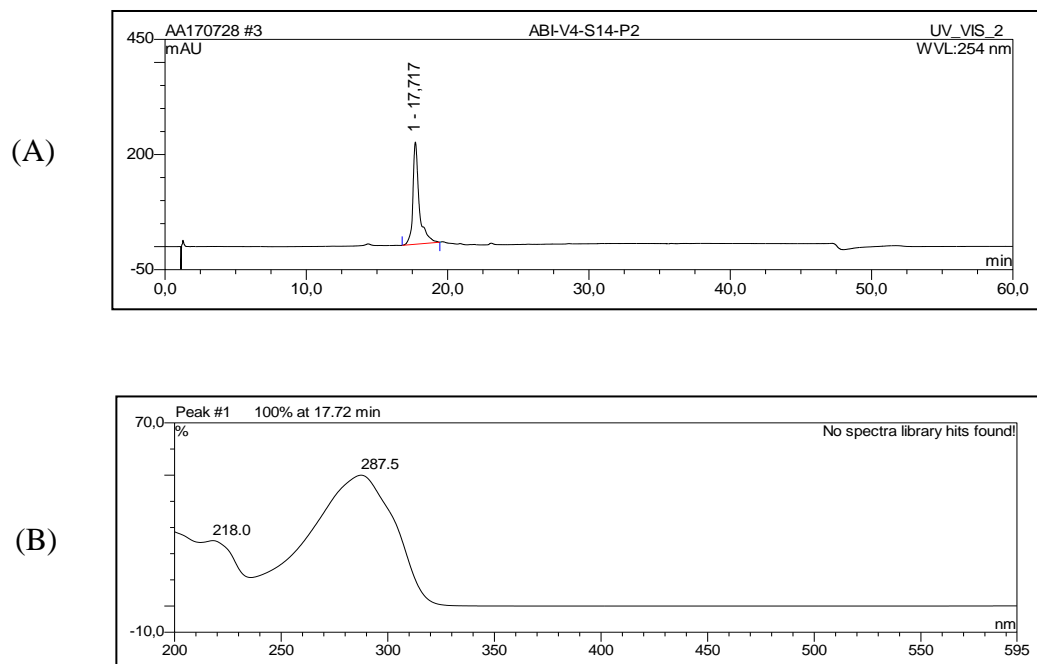

**Figure S2.** HPLC chromatogram (A) and UV spectrum (B) of compound **1**.

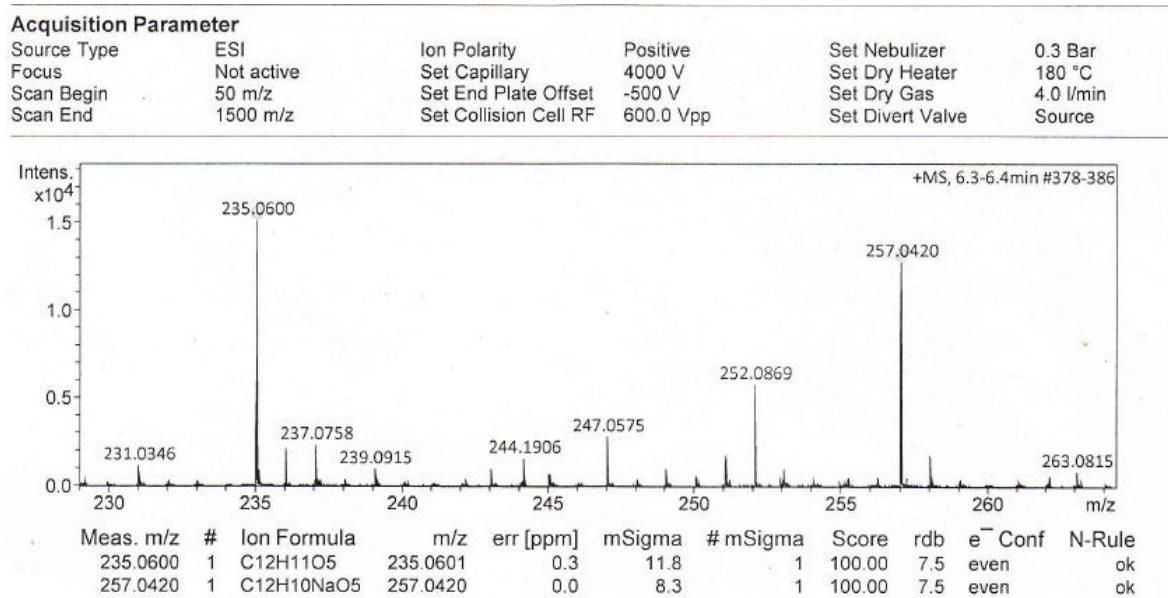

**Figure S3.** HRESIMS spectrum of compound **1**.

Ariantari.460.fid  
ABI-V4-514-P2

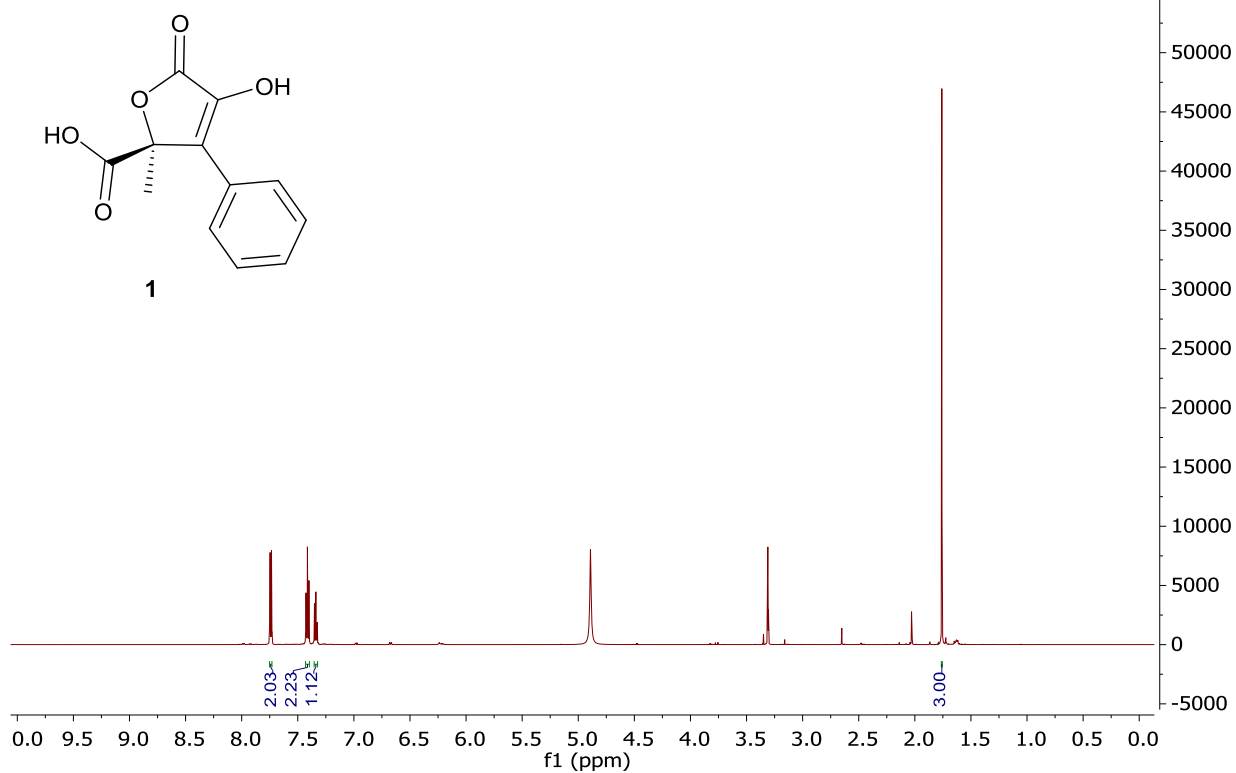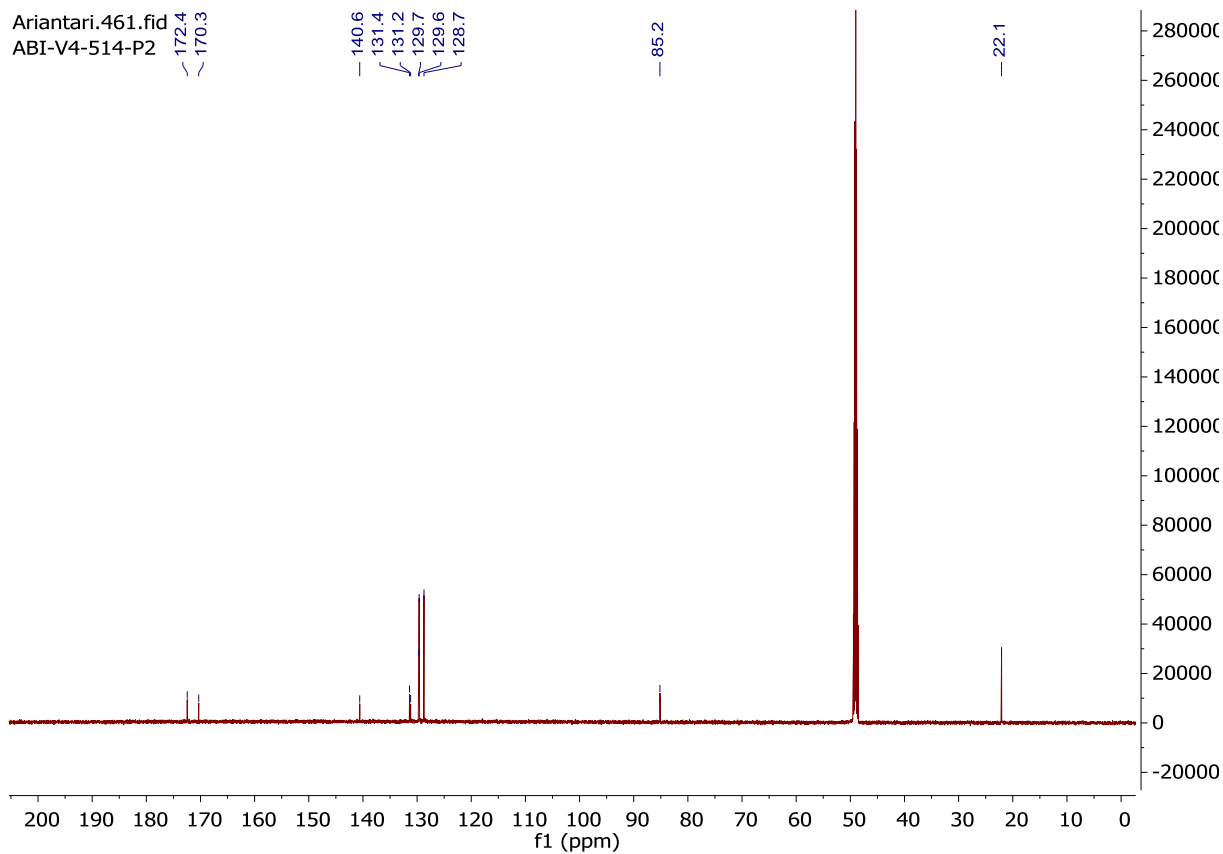

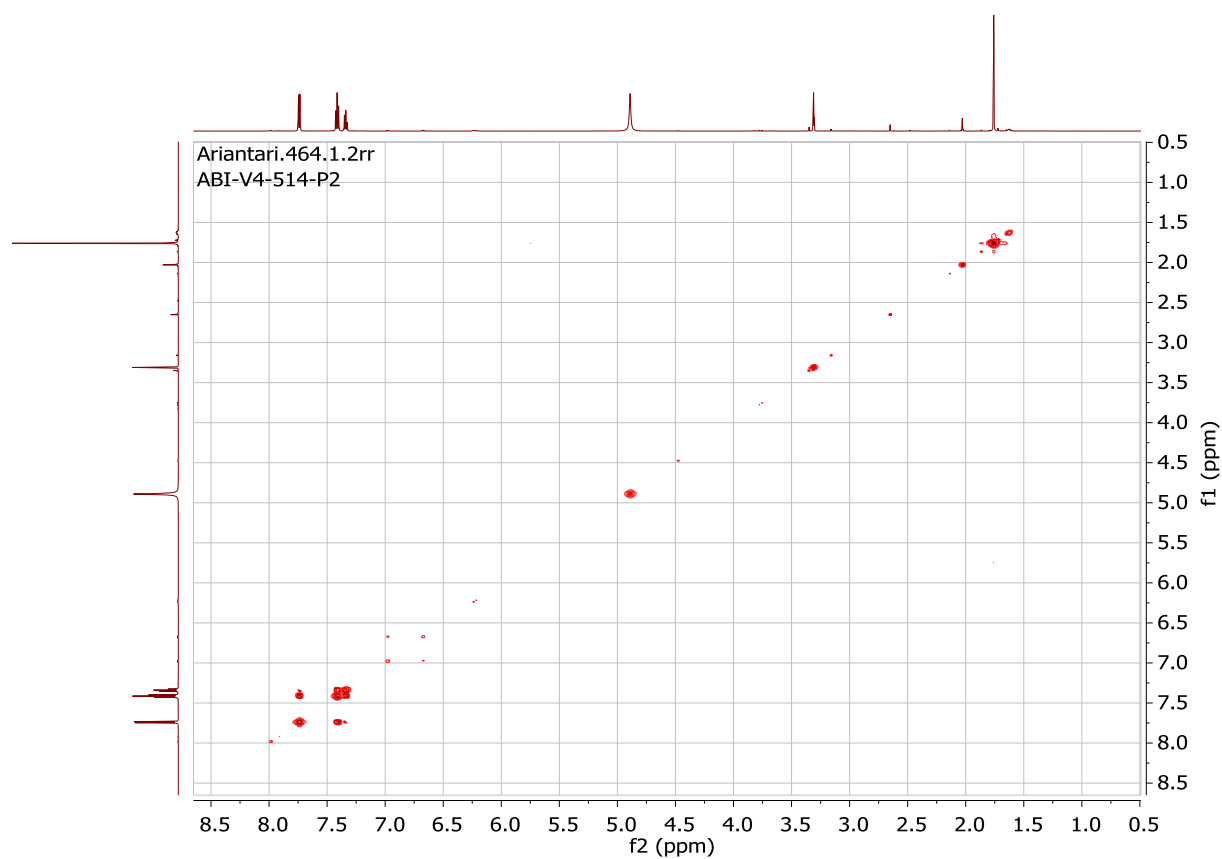

**Figure S6.**  $^1\text{H}$ - $^1\text{H}$  COSY (600 MHz,  $\text{MeOH-}d_4$ ) spectrum of compound **1**.

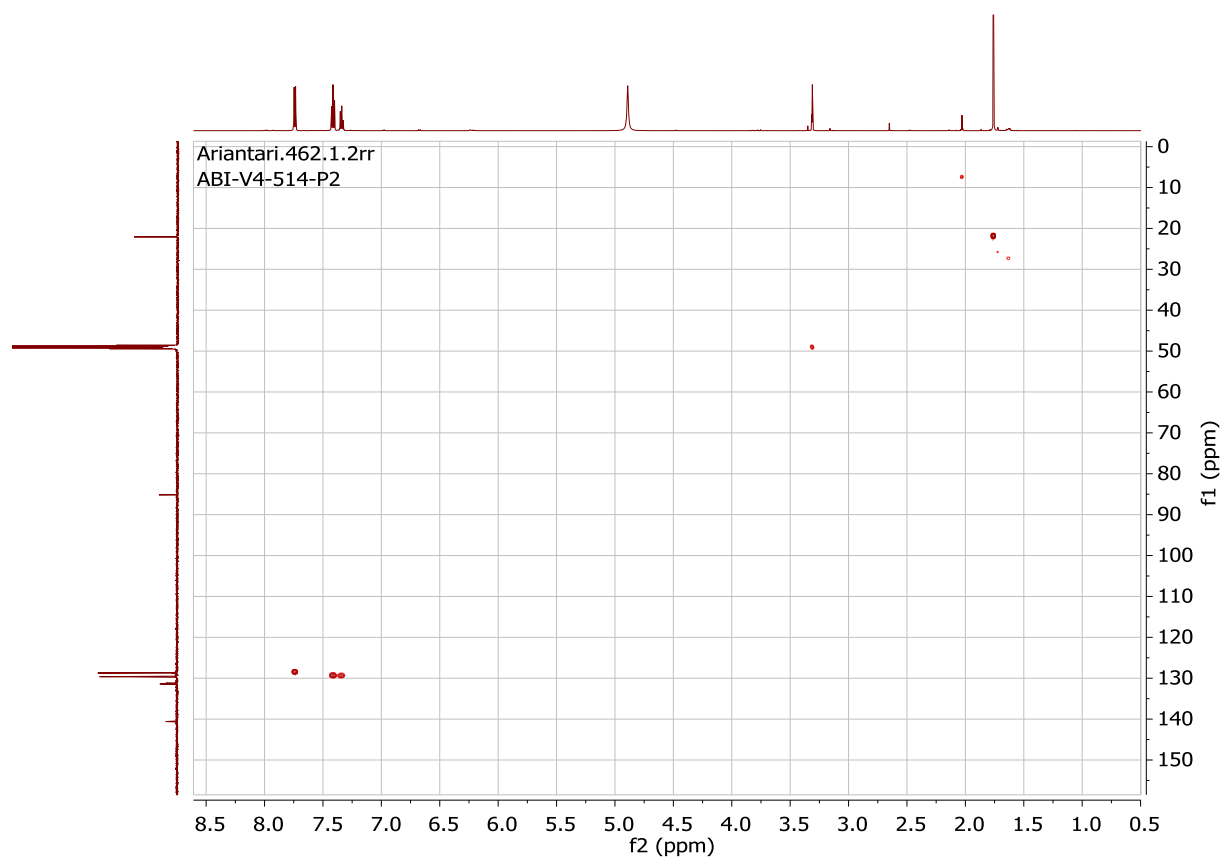

**Figure S7.** HSQC (600 and 150 MHz,  $\text{MeOH-}d_4$ ) spectrum of compound **1**.



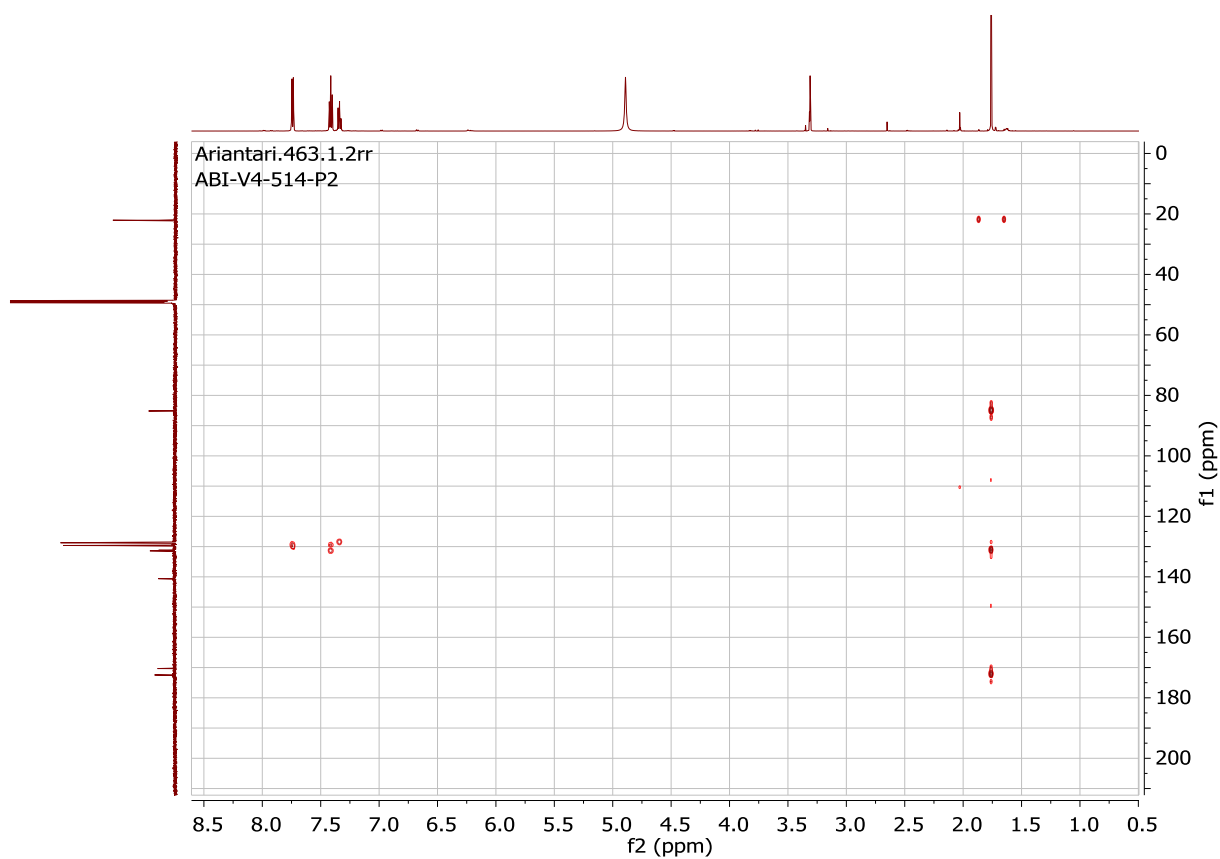

**Figure S8.** HMBC (600 and 150 MHz, MeOH- $d_4$ ) spectrum of compound **1**.

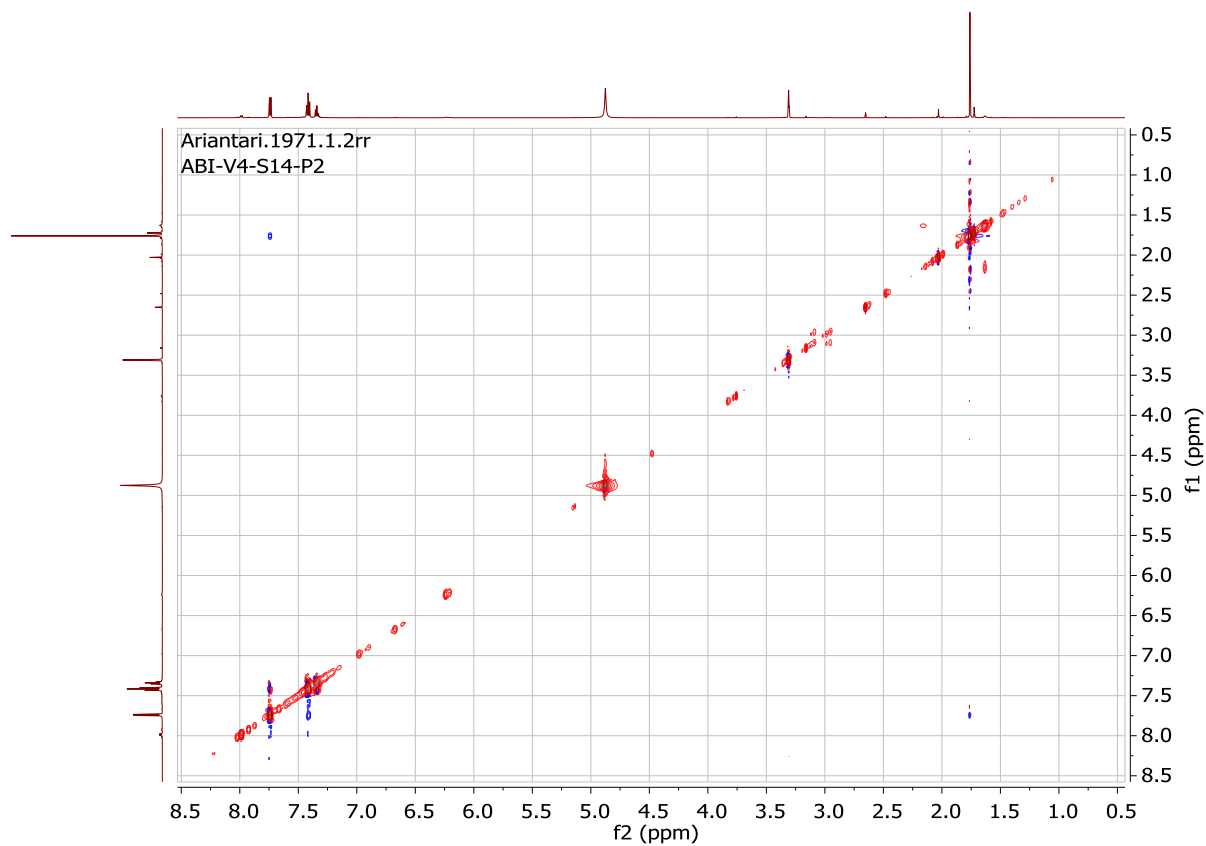

**Figure S9.** NOESY (600 MHz, MeOH- $d_4$ ) spectrum of compound **1**.

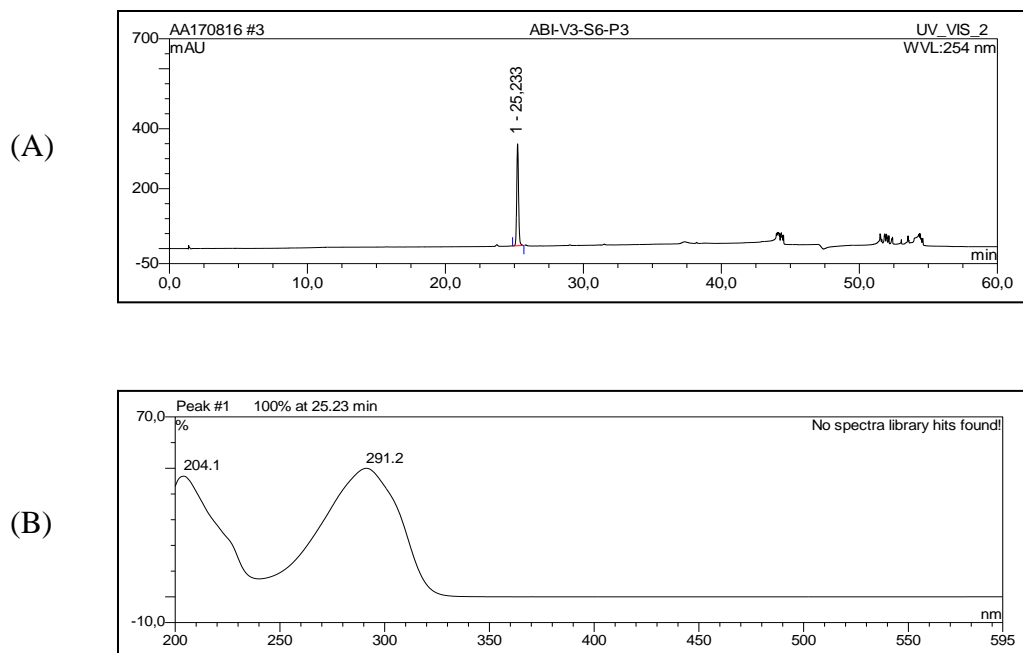

**Figure S10.** HPLC chromatogram (A) and UV spectrum (B) of compound **2**.

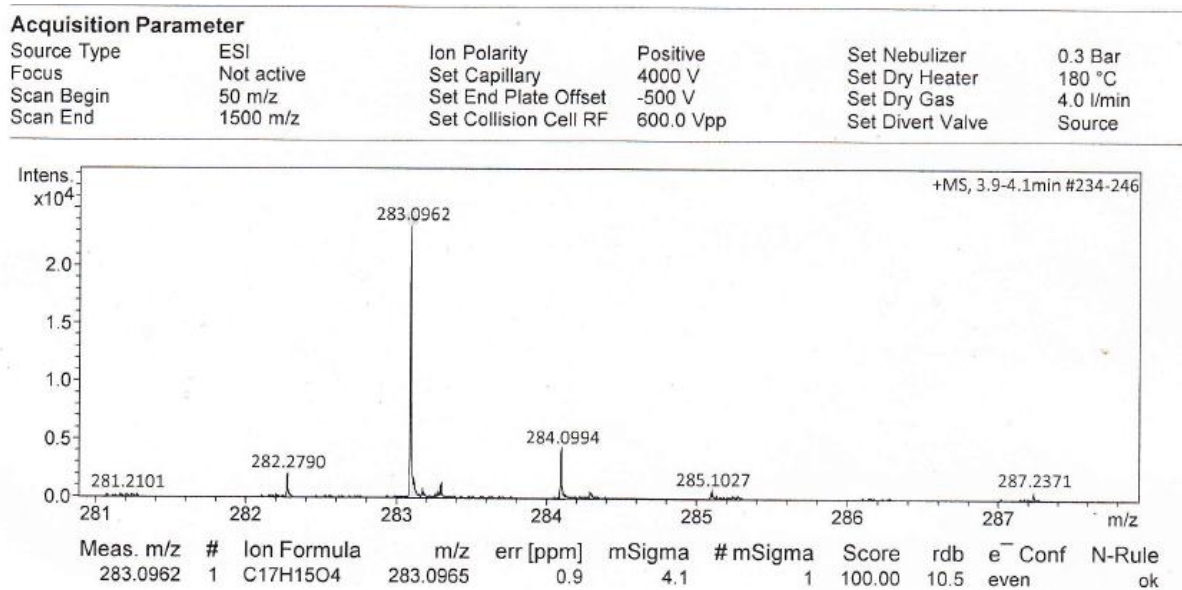

**Figure S11.** HRESIMS spectrum of compound **2**.

Ariantari.370.fid  
ABI-V3-S6-P3

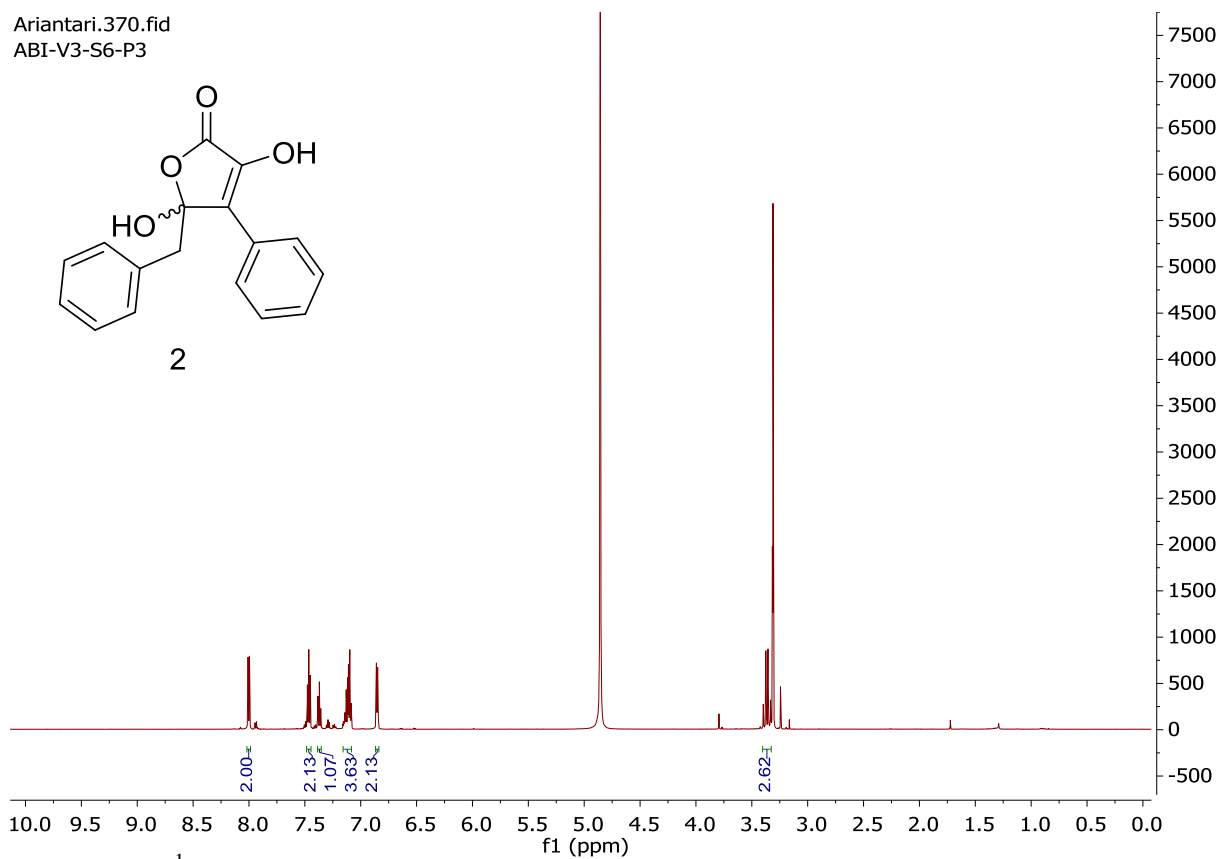

**Figure S12.**  $^1\text{H NMR}$  (600 MHz,  $\text{MeOH-}d_4$ ) spectrum of compound **2**.

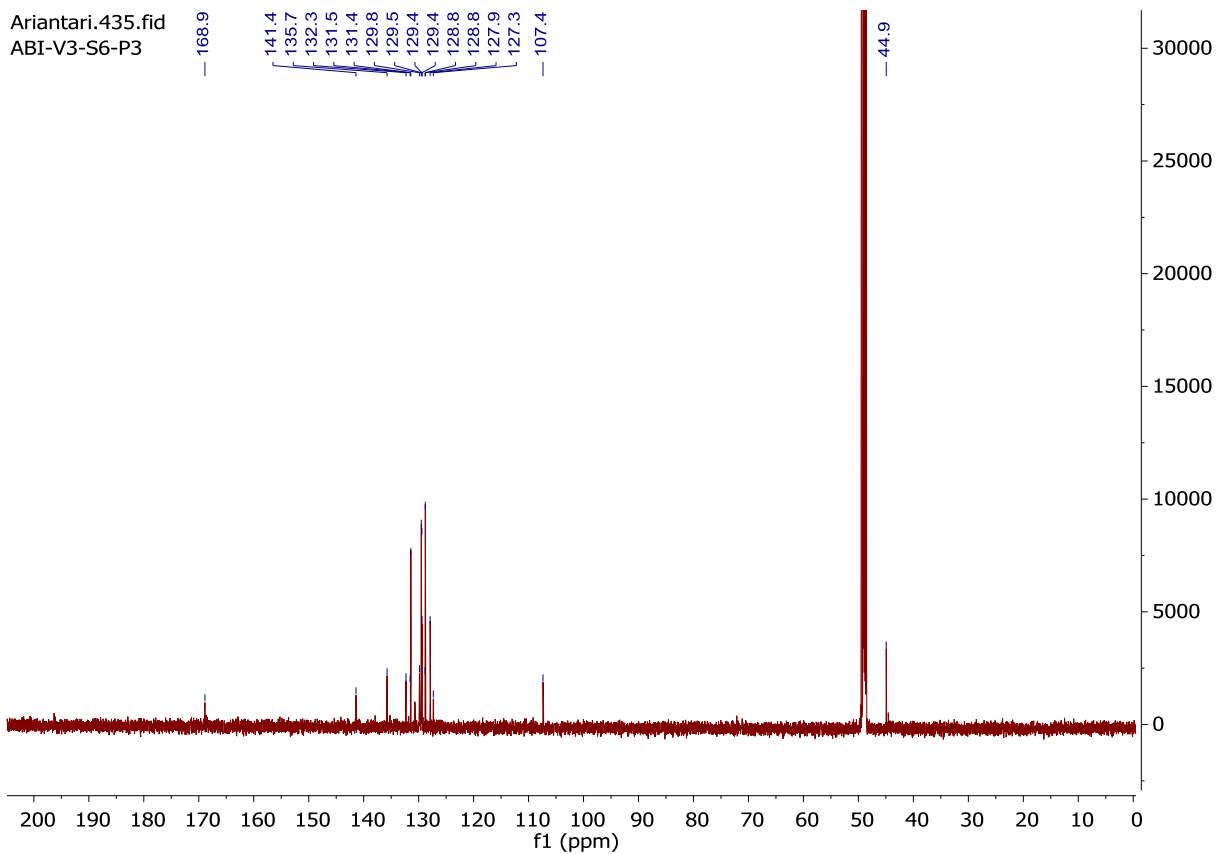

**Figure S13.**  $^{13}\text{C NMR}$  (150 MHz,  $\text{MeOH-}d_4$ ) spectrum of compound **2**.

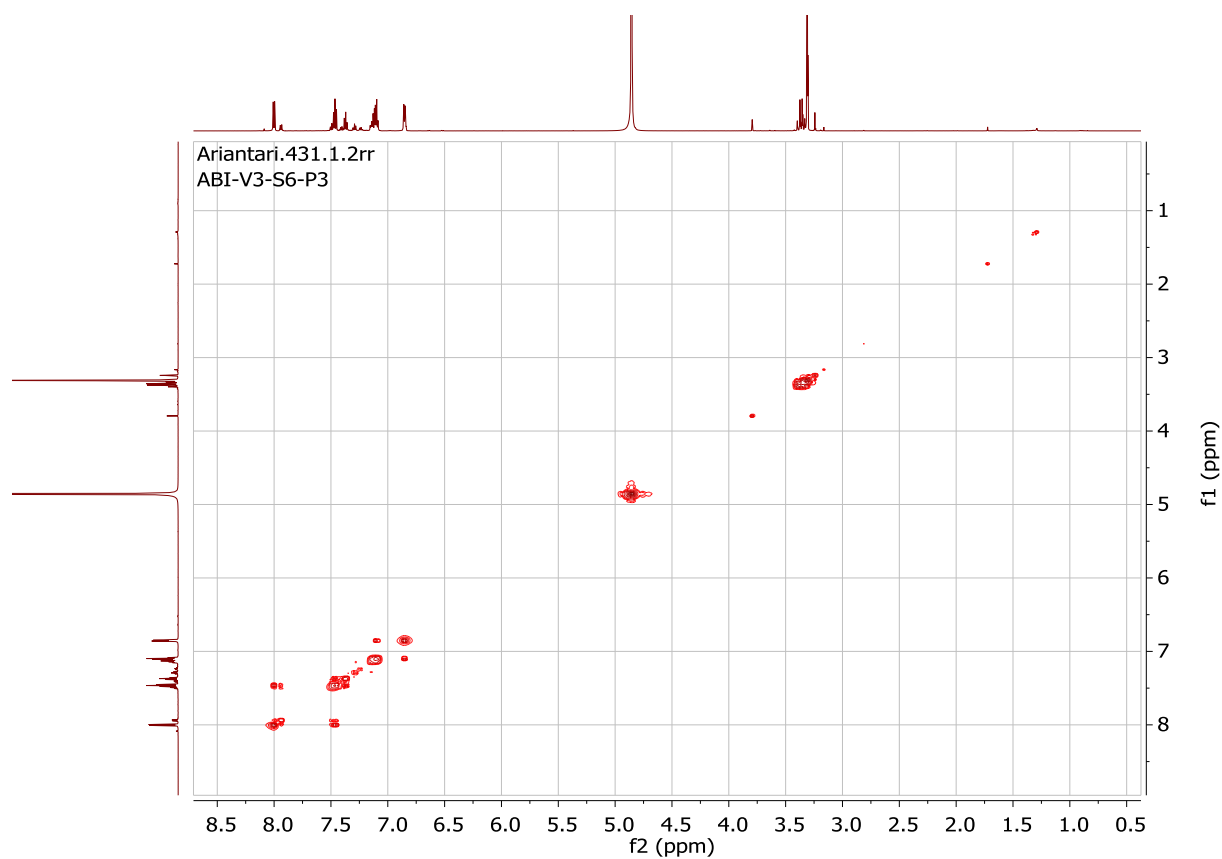

**Figure S14.**  $^1\text{H}$ - $^1\text{H}$  COSY (600 MHz,  $\text{MeOH-}d_4$ ) spectrum of compound **2**.

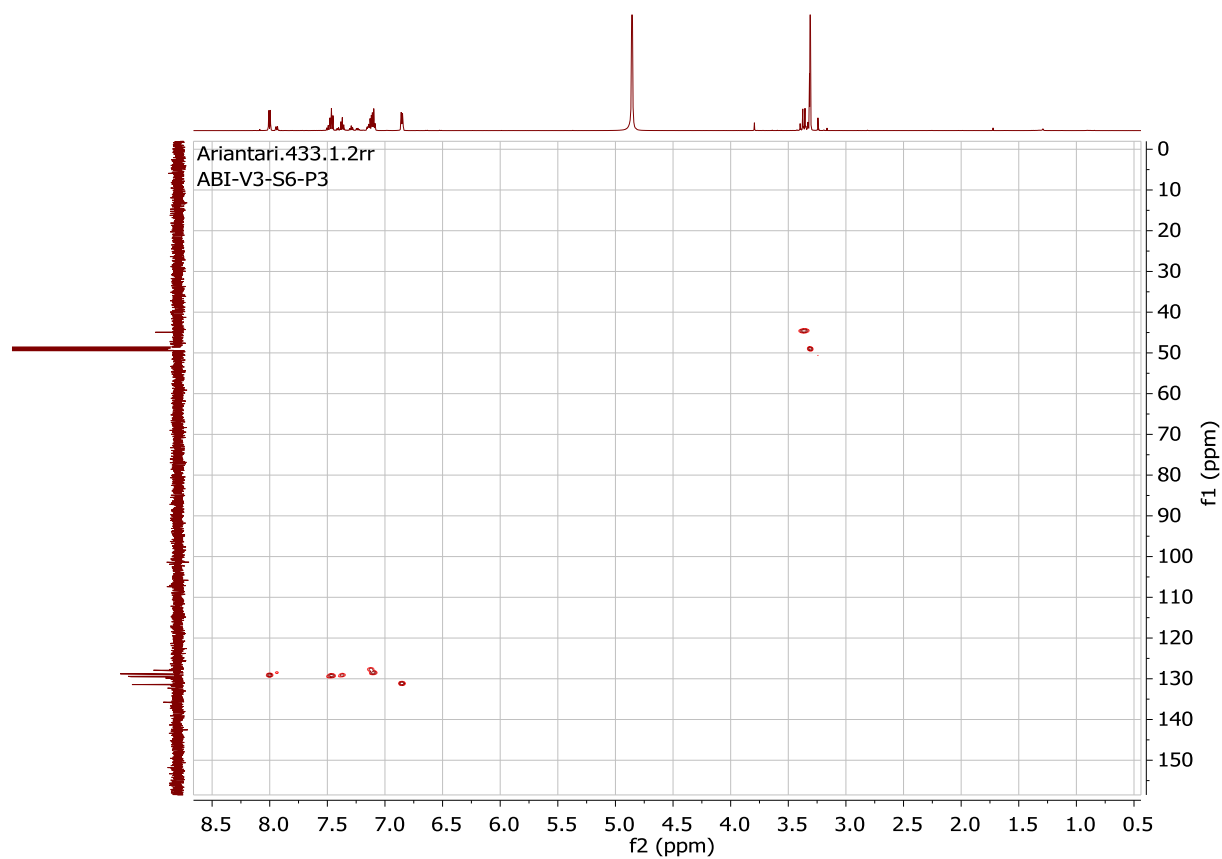

**Figure S15.** HSQC (600 and 150 MHz,  $\text{MeOH-}d_4$ ) spectrum of compound **2**.

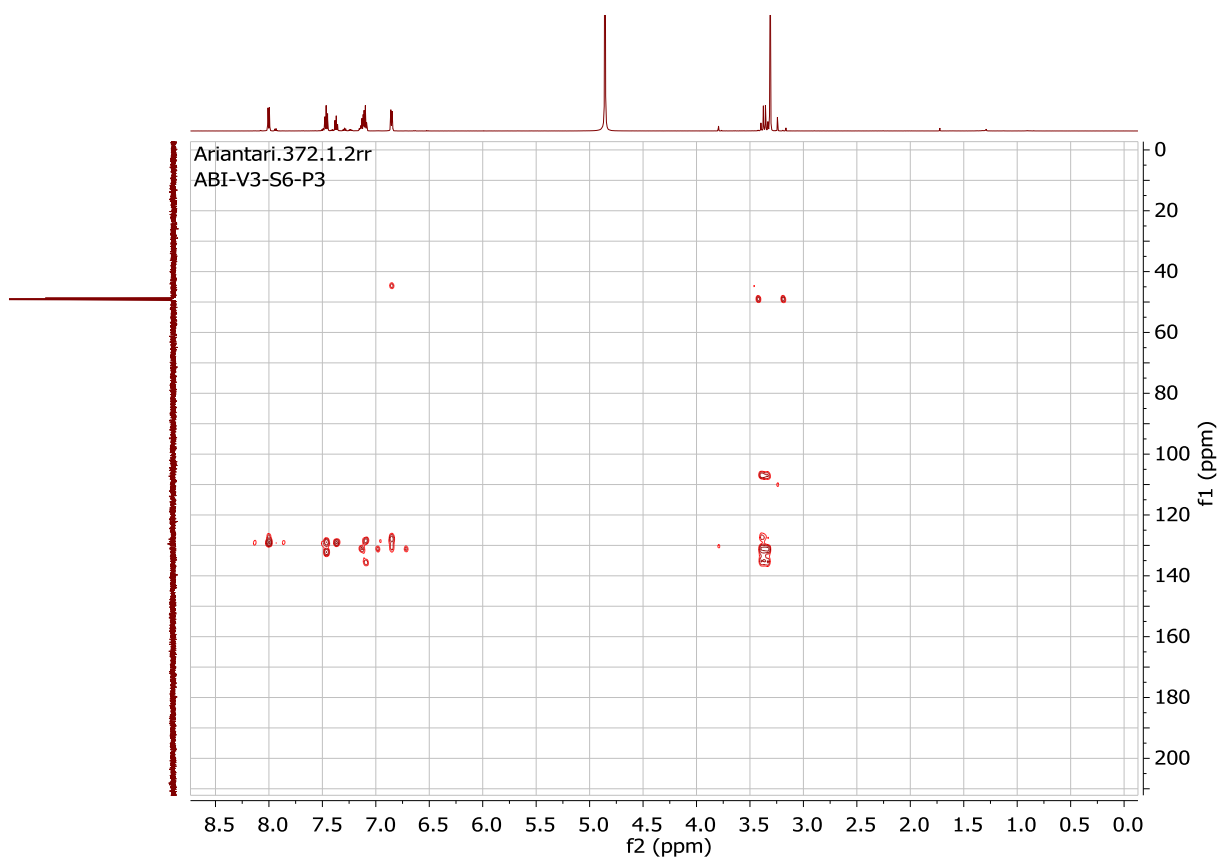

**Figure S16.** HMBC (600 and 150 MHz, MeOH-*d*<sub>4</sub>) spectrum of compound **2**.

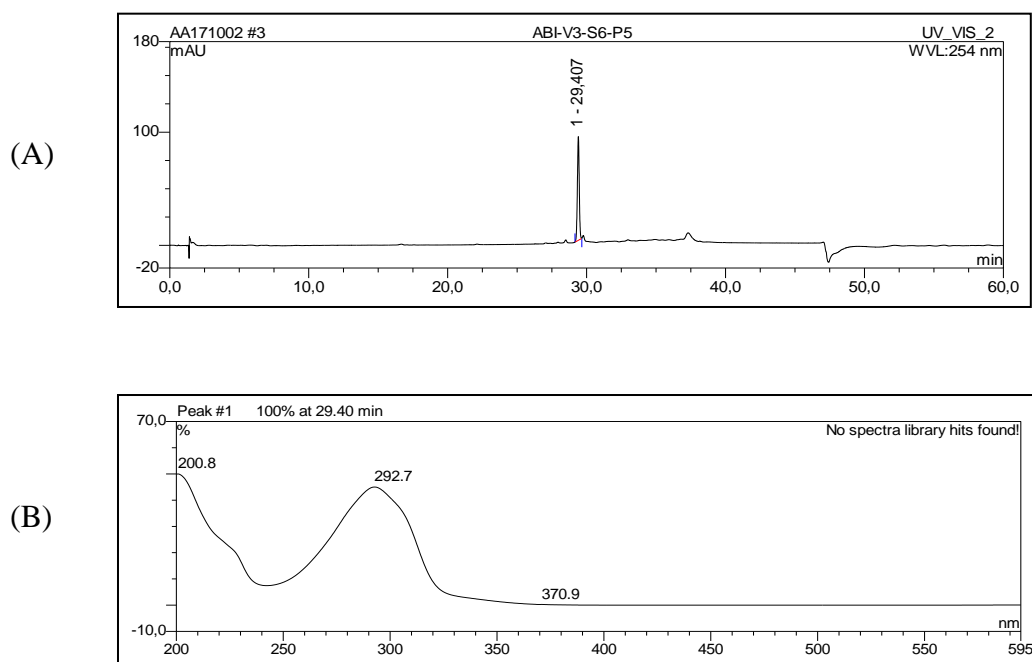

**Figure S17.** HPLC chromatogram (A) and UV spectrum (B) of compound **3**.

**Acquisition Parameter**

|             |            |                       |           |                  |           |
|-------------|------------|-----------------------|-----------|------------------|-----------|
| Source Type | ESI        | Ion Polarity          | Positive  | Set Nebulizer    | 0.3 Bar   |
| Focus       | Not active | Set Capillary         | 4000 V    | Set Dry Heater   | 180 °C    |
| Scan Begin  | 50 m/z     | Set End Plate Offset  | -500 V    | Set Dry Gas      | 4.0 l/min |
| Scan End    | 1500 m/z   | Set Collision Cell RF | 600.0 Vpp | Set Divert Valve | Source    |

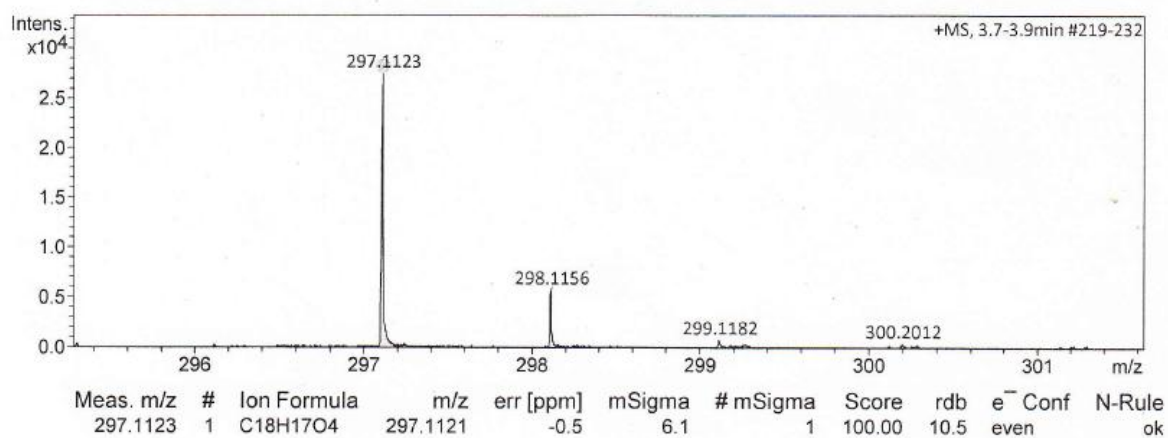

**Figure S18.** HRESIMS spectrum of compound **3**.

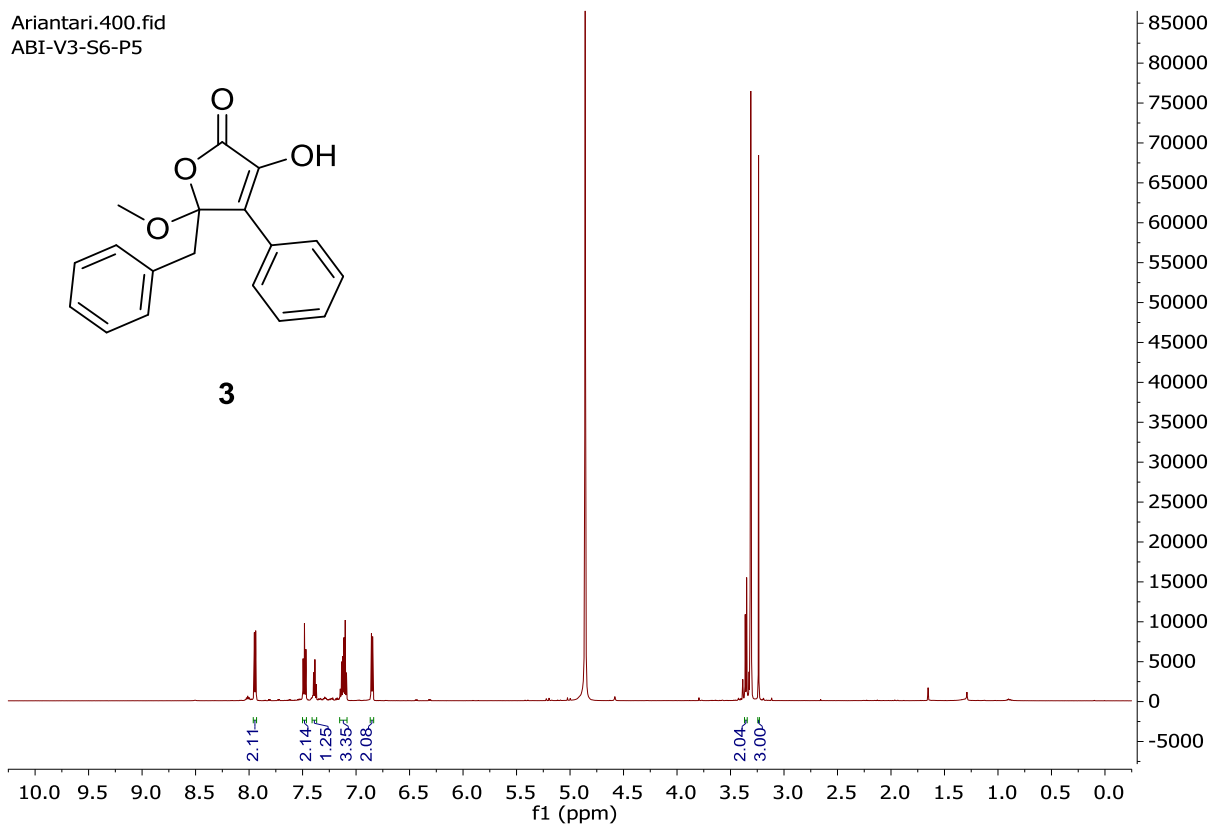

**Figure S19.** <sup>1</sup>H NMR (600 MHz, MeOH-*d*<sub>4</sub>) spectrum of compound **3**.

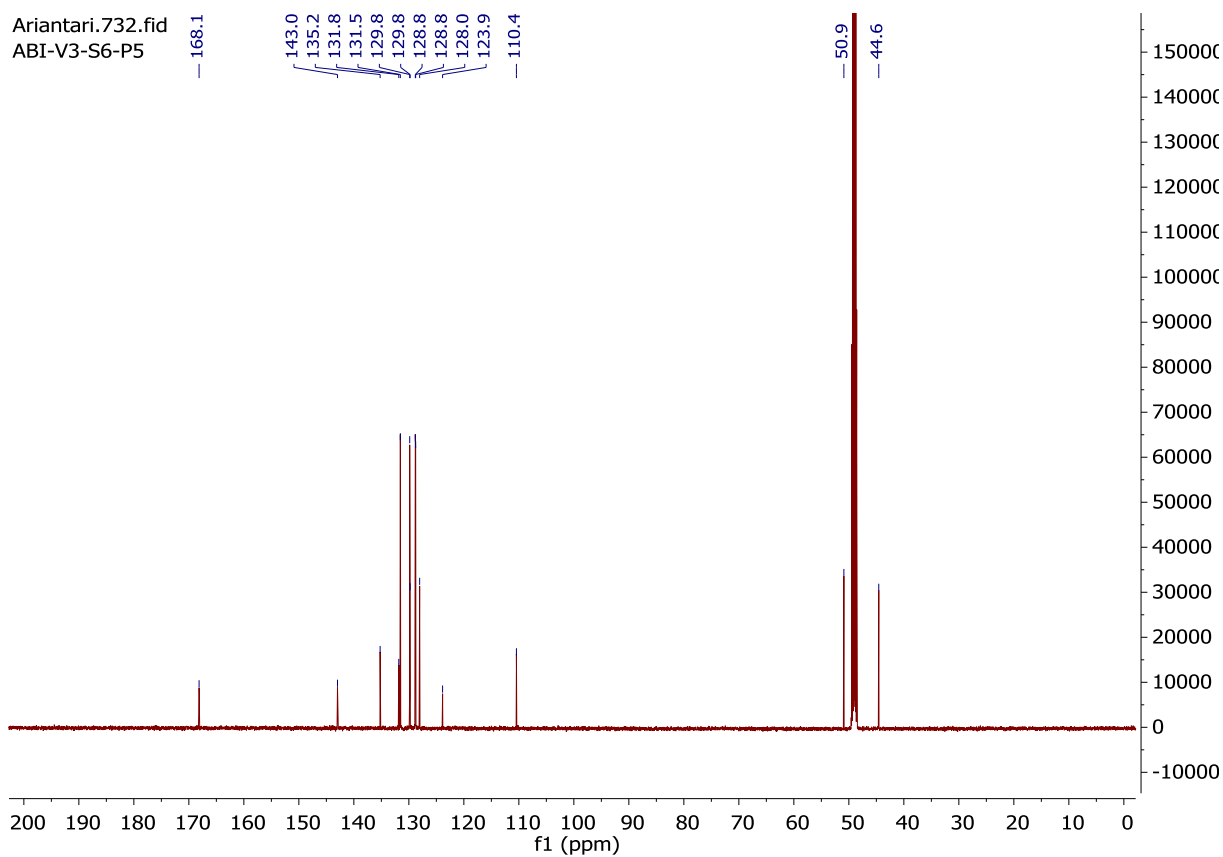

**Figure S20.**  $^{13}\text{C}$  NMR (150 MHz,  $\text{MeOH-}d_4$ ) spectrum of compound **3**.

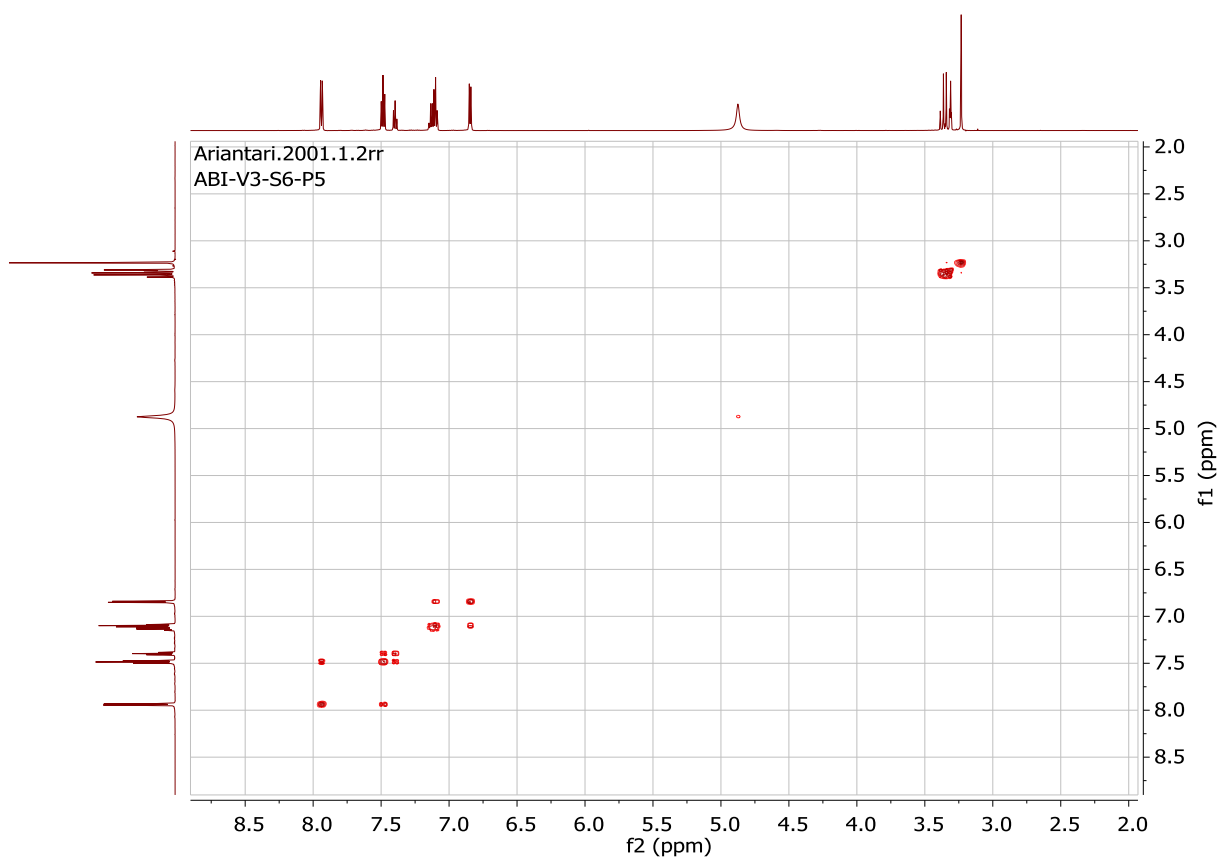

**Figure S21.**  $^1\text{H-}^1\text{H}$  COSY (600 MHz,  $\text{MeOH-}d_4$ ) spectrum of compound **3**.

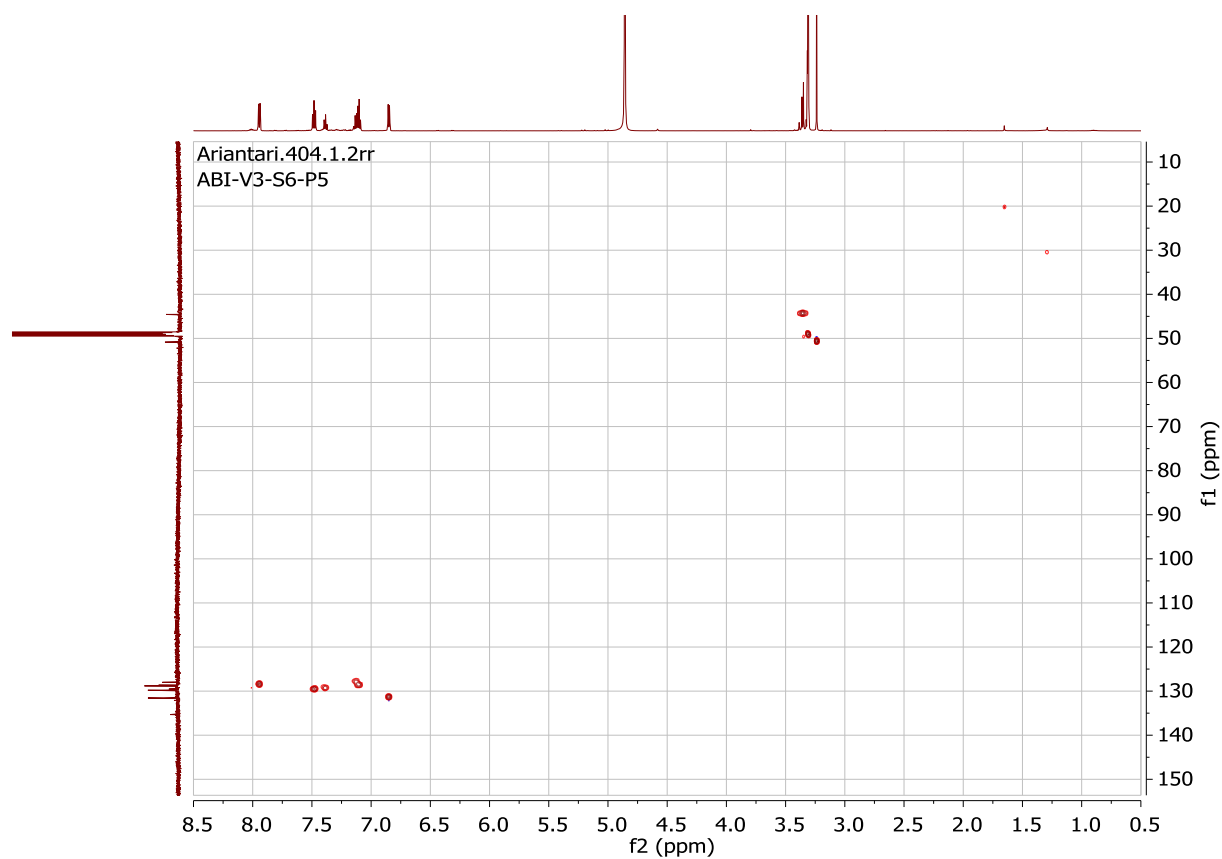

**Figure S22.** HSQC (600 and 150 MHz, MeOH-*d*<sub>4</sub>) spectrum of compound **3**.

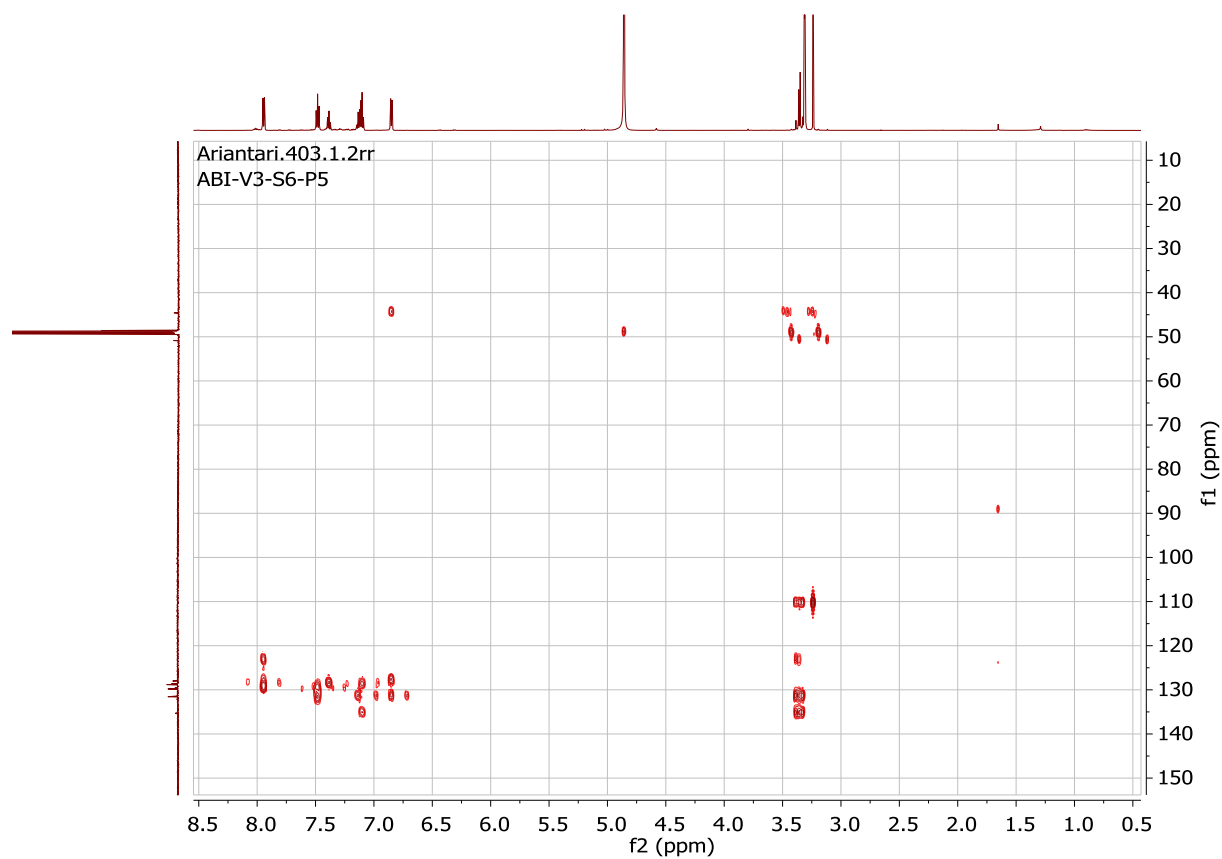

**Figure S23.** HMBC (600 and 150 MHz, MeOH-*d*<sub>4</sub>) spectrum of compound **3**.



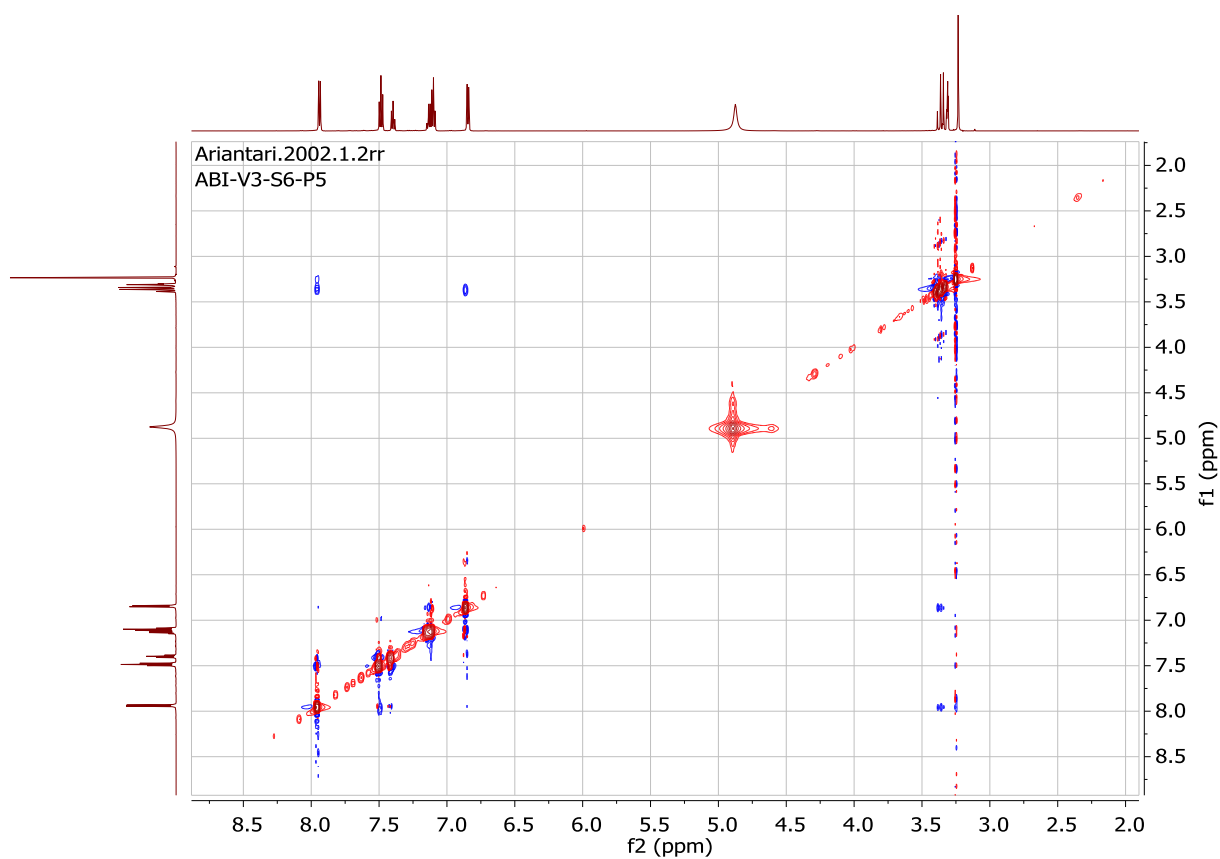

**Figure S24.** NOESY (600 MHz, MeOH- $d_4$ ) spectrum of compound **3**.

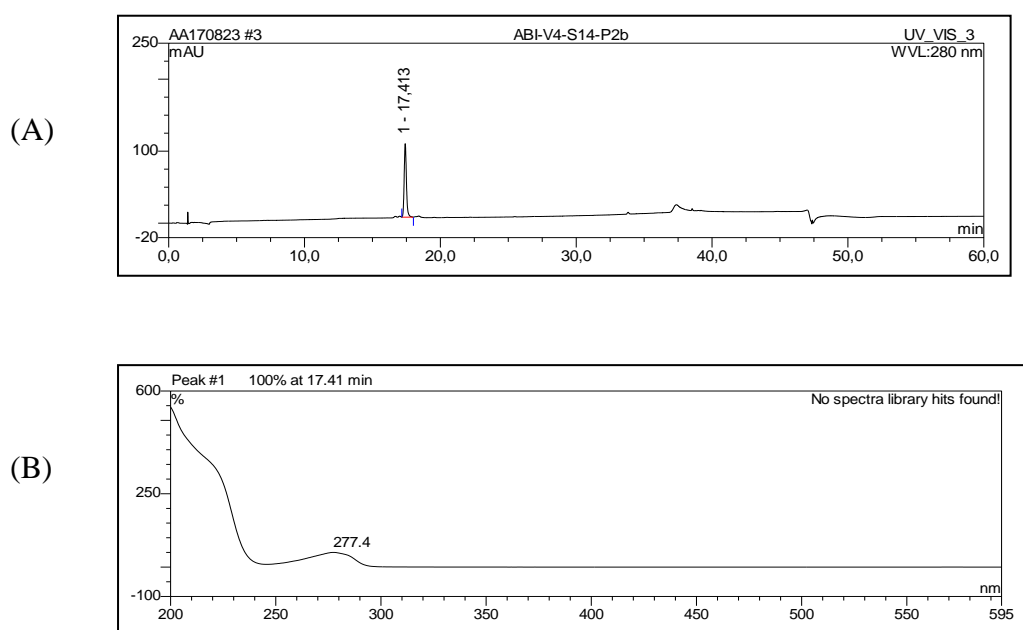

**Figure S25.** HPLC chromatogram (A) and UV spectrum (B) of compound **4**.

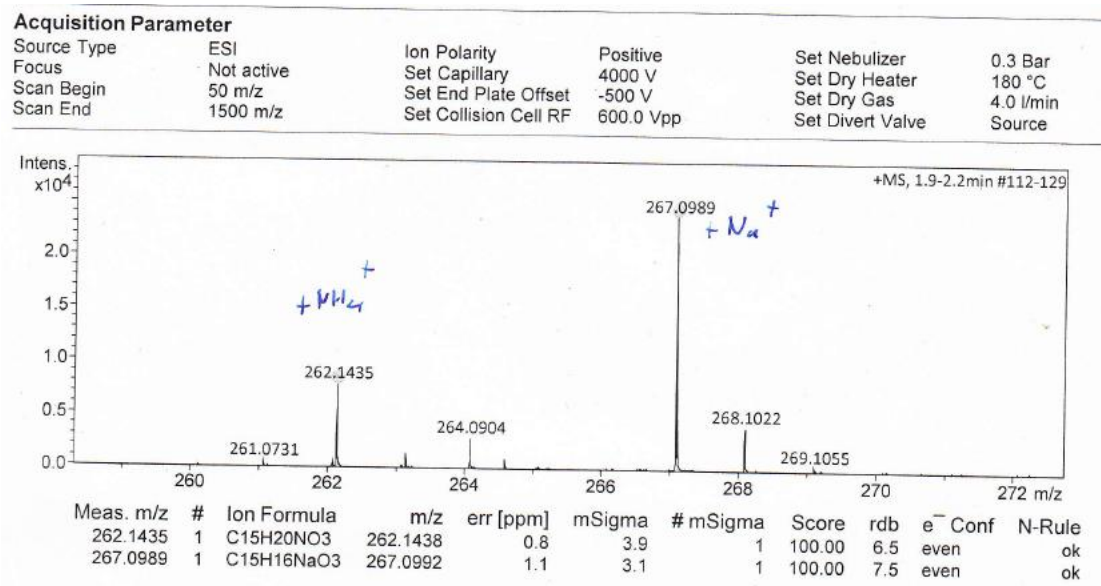

**Figure S26.** HRESIMS spectrum of compound **4**.

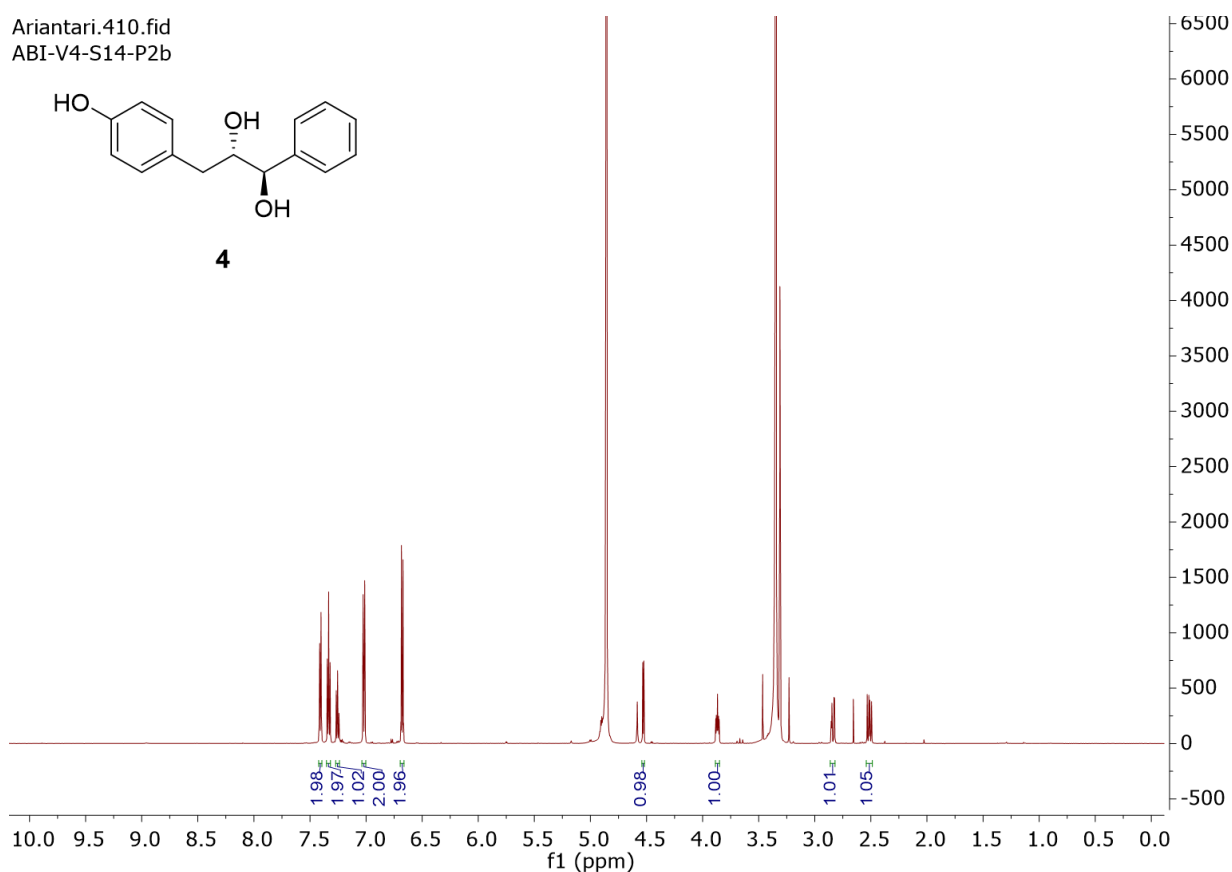

**Figure S27.** <sup>1</sup>H NMR (600 MHz, MeOH-*d*<sub>4</sub>) spectrum of compound **4**.

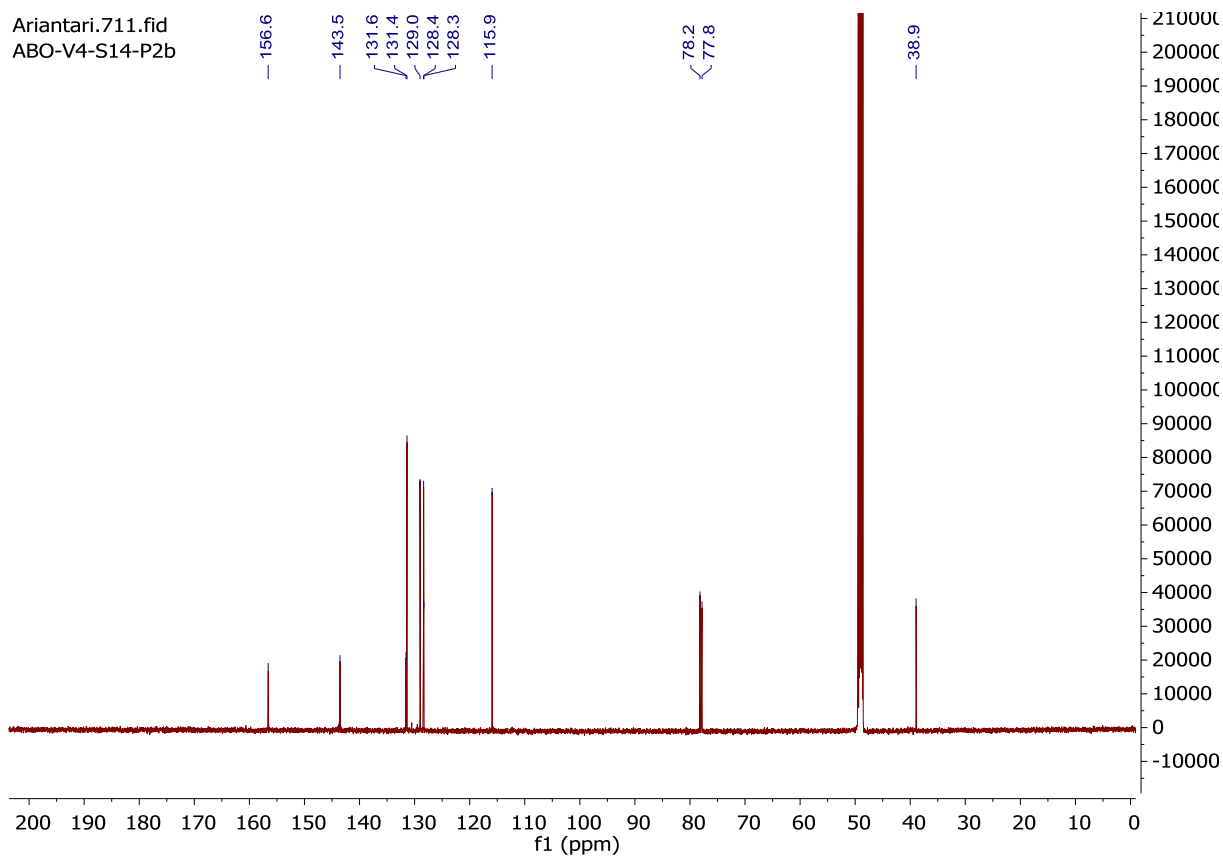

**Figure S28.**  $^{13}\text{C}$  NMR (150 MHz,  $\text{MeOH-}d_4$ ) spectrum of compound **4**.

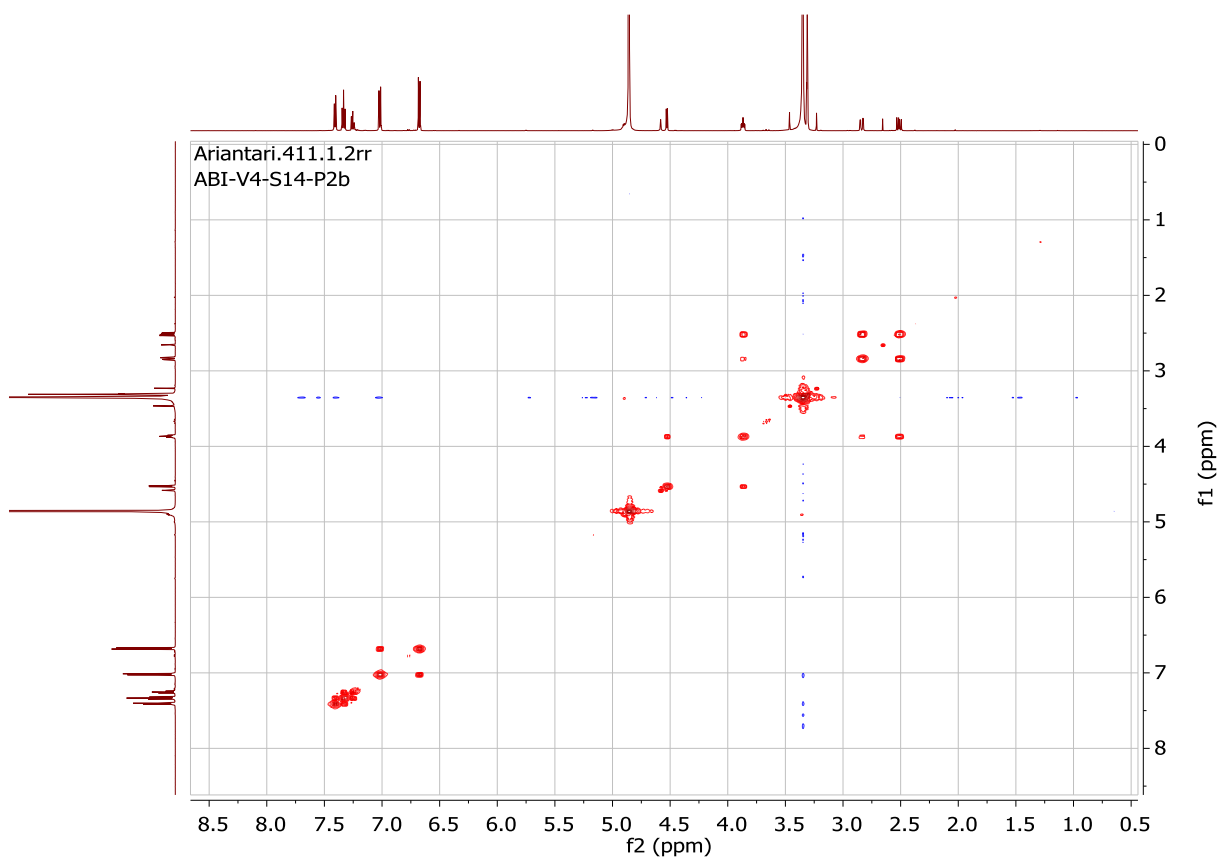

**Figure S29.**  $^1\text{H-}^1\text{H}$  COSY (600 MHz,  $\text{MeOH-}d_4$ ) spectrum of compound **4**.

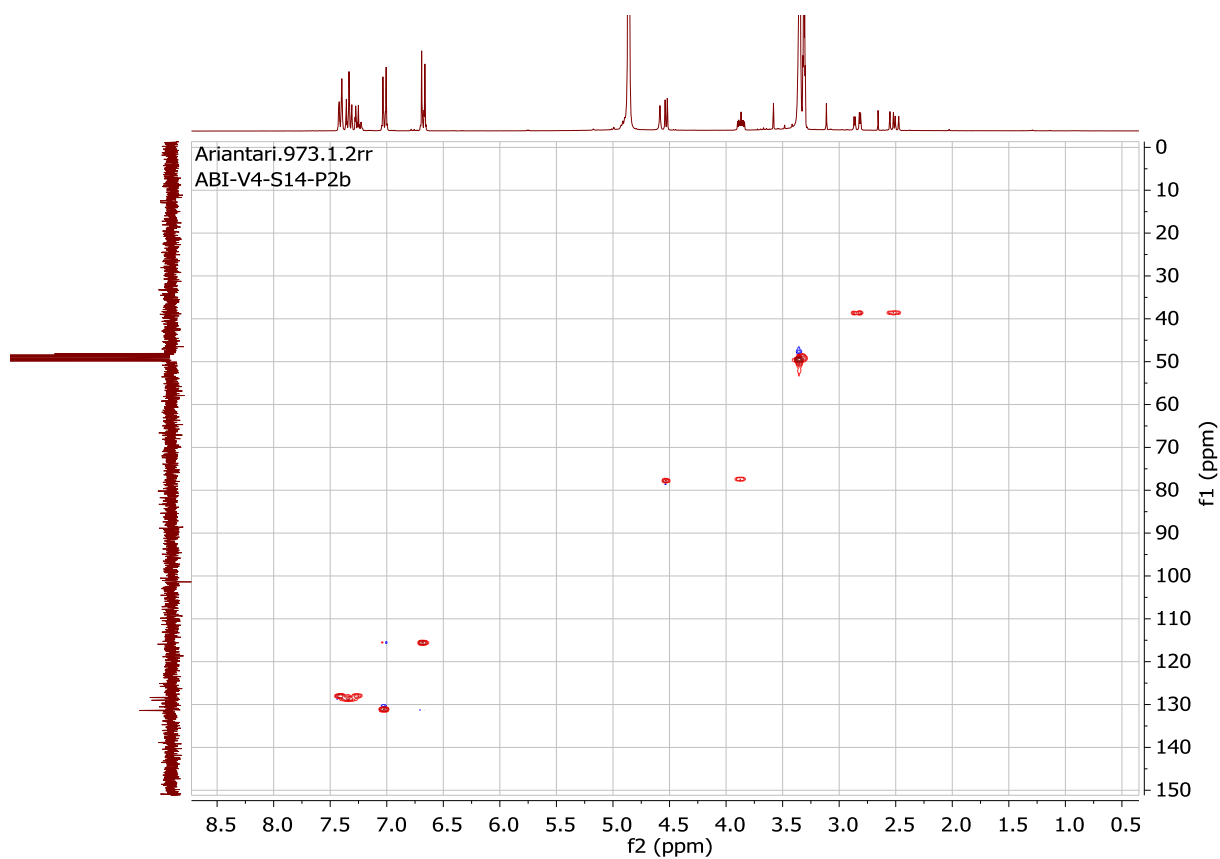

**Figure S30.** HSQC (300 and 75 MHz, MeOH-*d*<sub>4</sub>) spectrum of compound **4**.

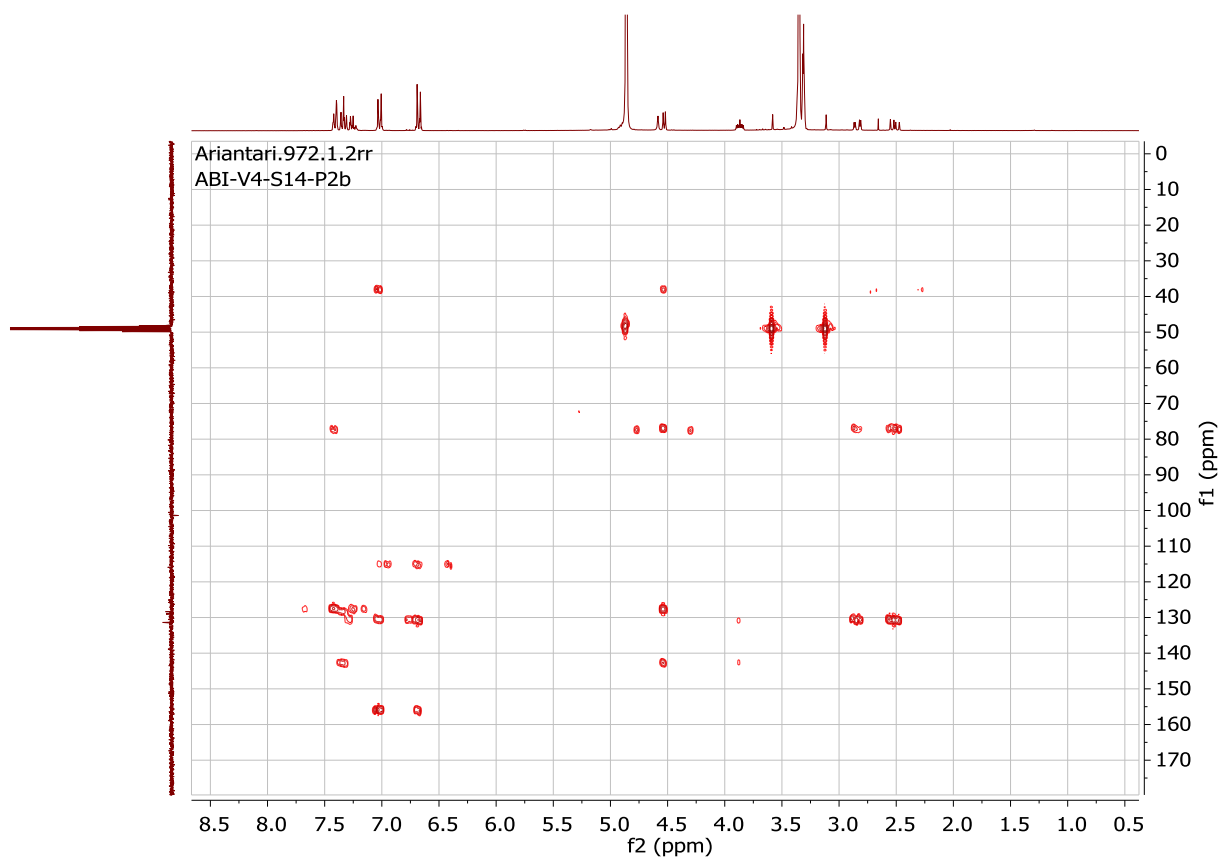

**Figure S31.** HMBC (300 and 75 MHz, MeOH-*d*<sub>4</sub>) spectrum of compound **4**.

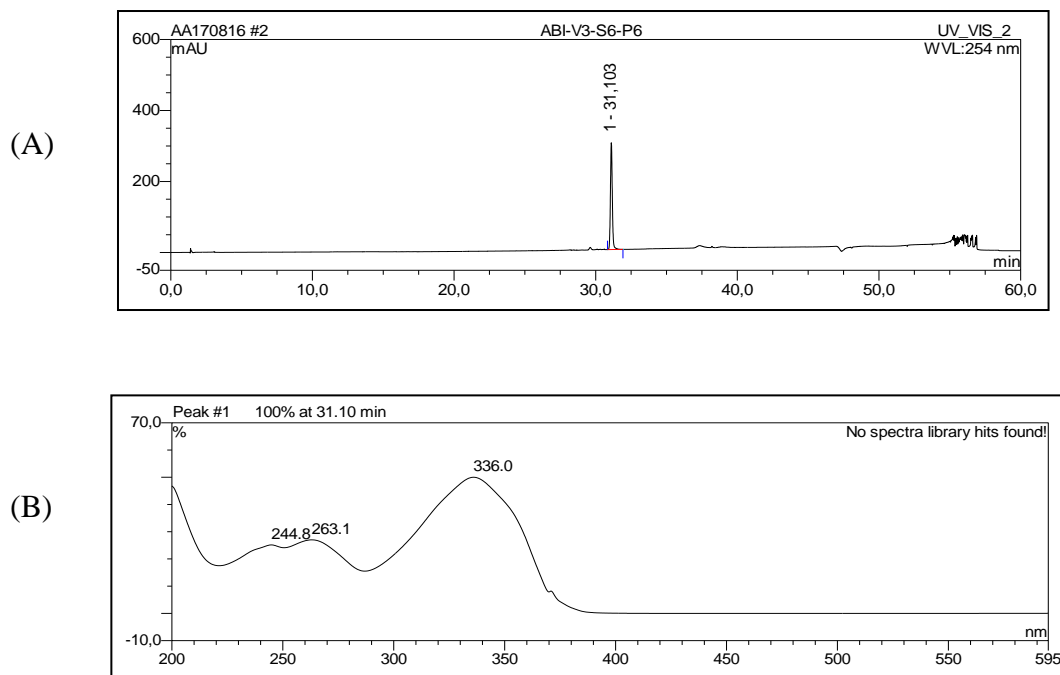

**Figure S32.** HPLC chromatogram (A) and UV spectrum (B) of compound **5**.

**Acquisition Parameter**

|             |            |                       |           |                  |           |
|-------------|------------|-----------------------|-----------|------------------|-----------|
| Source Type | ESI        | Ion Polarity          | Positive  | Set Nebulizer    | 0.3 Bar   |
| Focus       | Not active | Set Capillary         | 4000 V    | Set Dry Heater   | 180 °C    |
| Scan Begin  | 50 m/z     | Set End Plate Offset  | -500 V    | Set Dry Gas      | 4.0 l/min |
| Scan End    | 1500 m/z   | Set Collision Cell RF | 600.0 Vpp | Set Divert Valve | Source    |

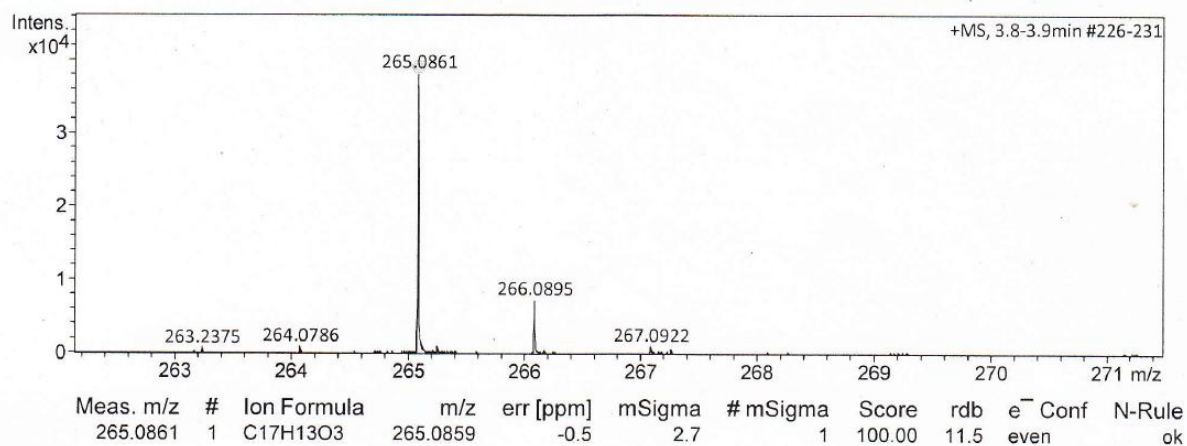

**Figure S33.** HRESIMS spectrum of compound **5**.

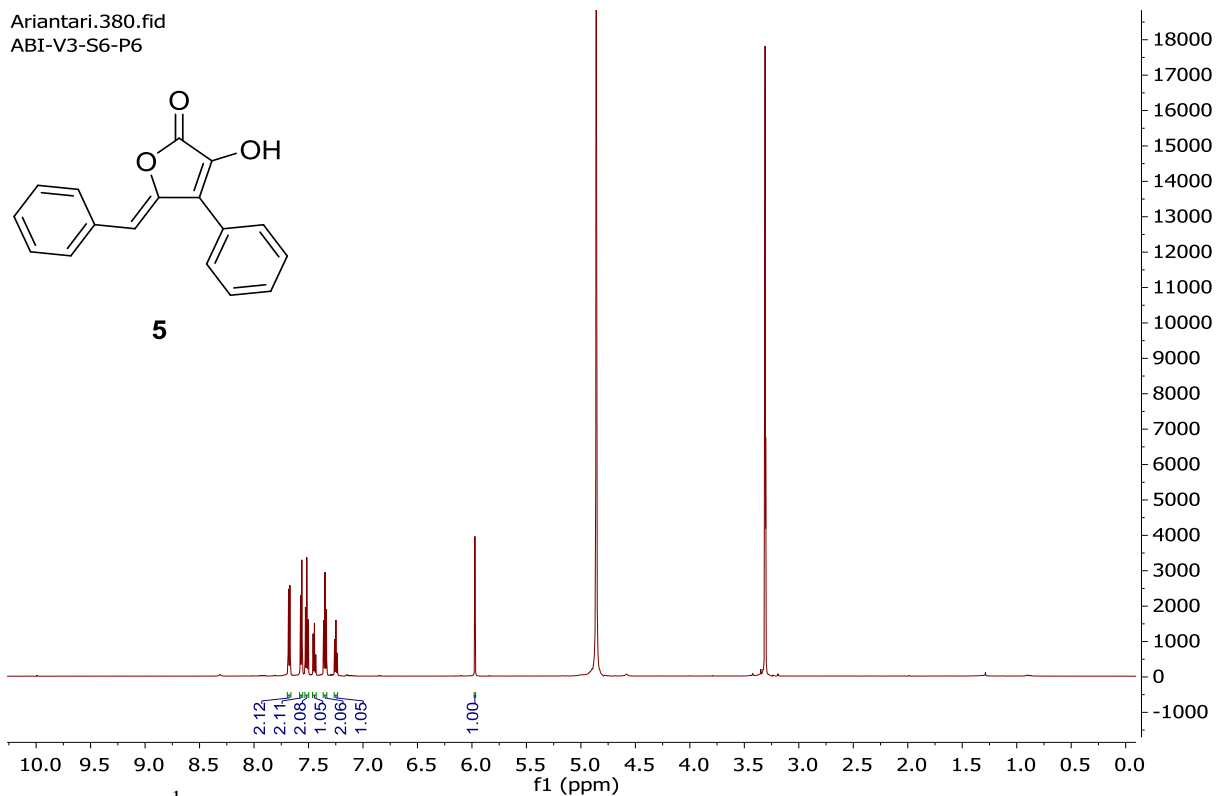

**Figure S34.**  $^1\text{H}$  NMR (600 MHz,  $\text{MeOH-}d_4$ ) spectrum of compound **5**.

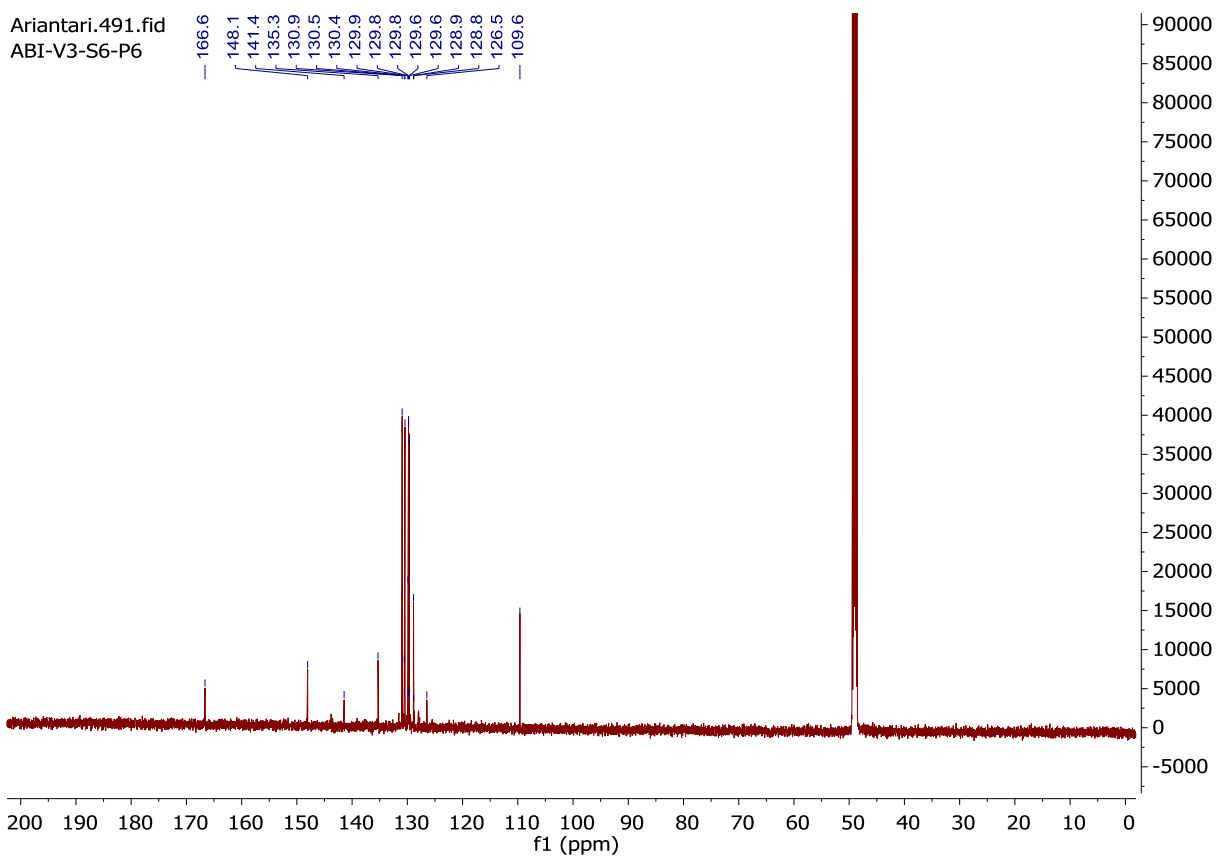

**Figure S35.**  $^{13}\text{C}$  NMR (150 MHz,  $\text{MeOH-}d_4$ ) spectrum of compound **5**.

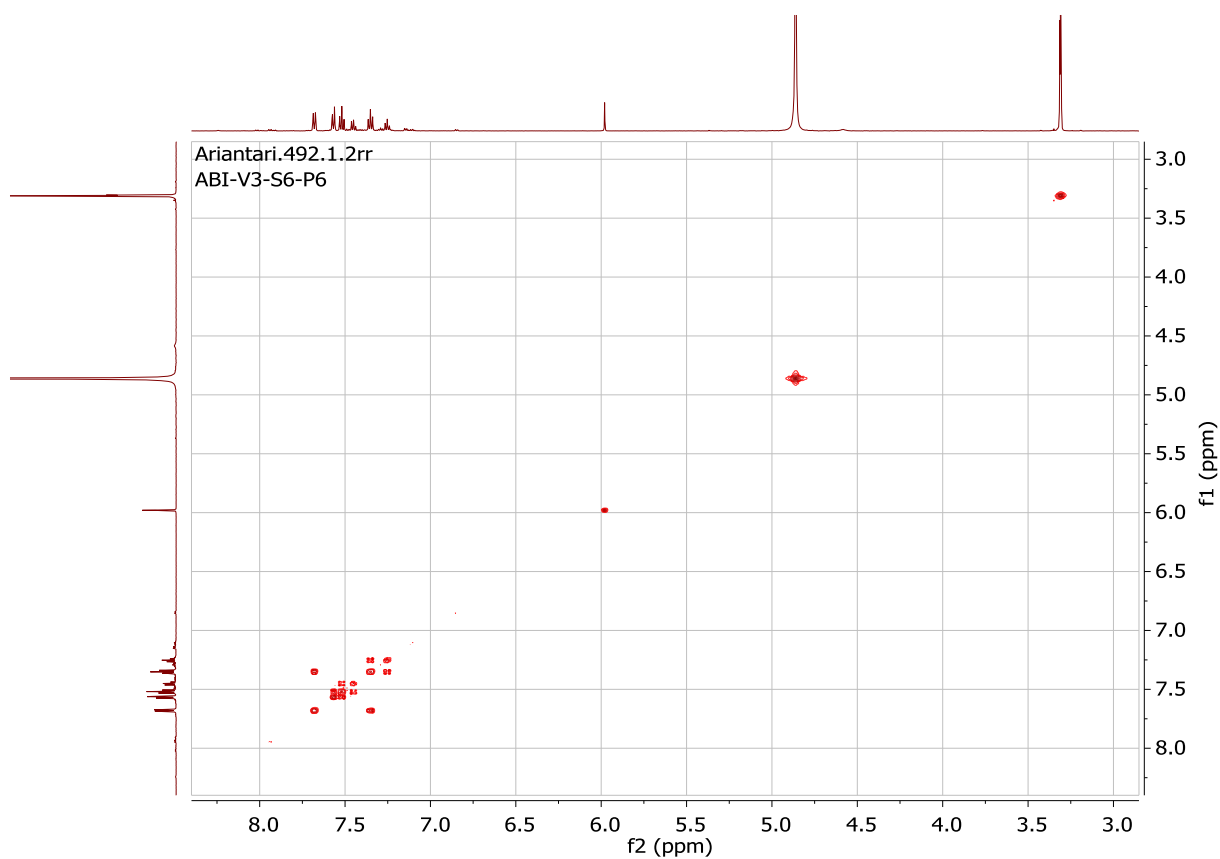

**Figure S36.**  $^1\text{H}$ - $^1\text{H}$  COSY (600 MHz,  $\text{MeOH-}d_4$ ) spectrum of compound **5**.

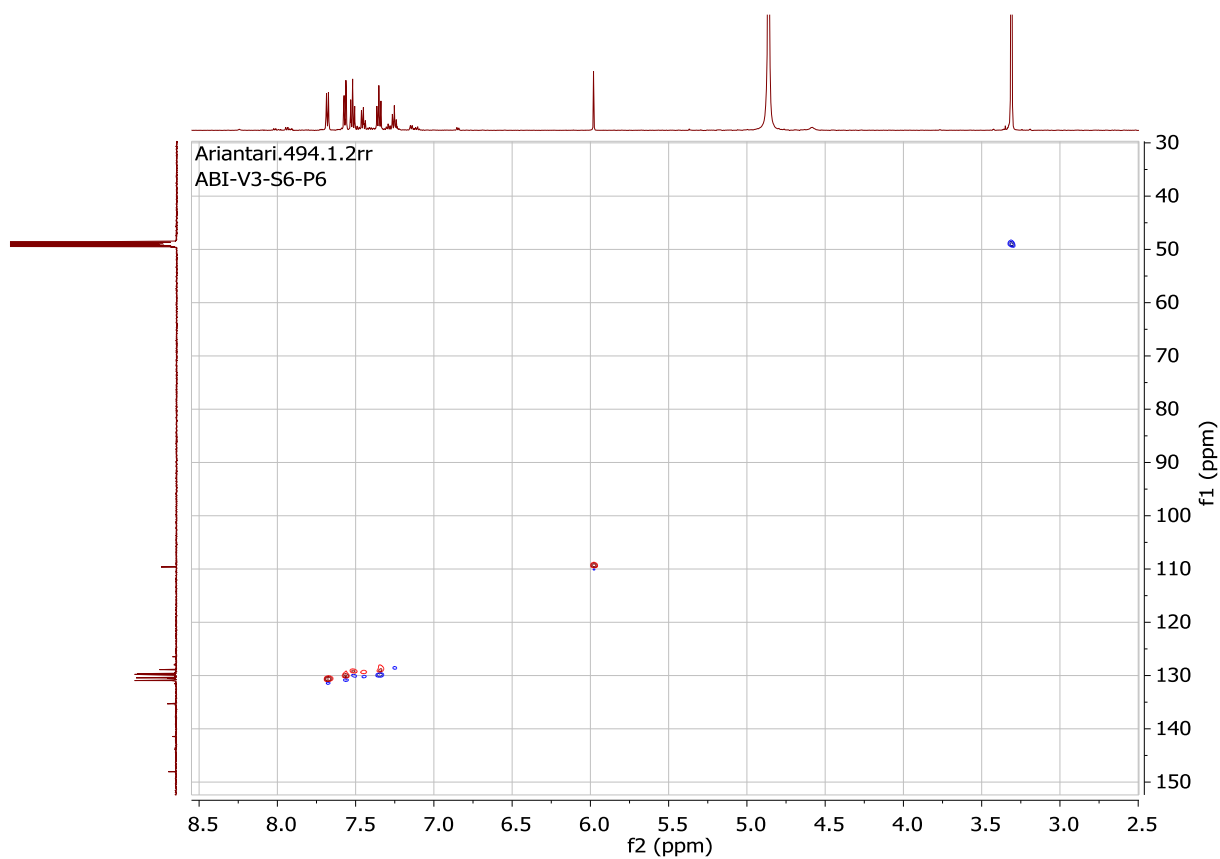

**Figure S37.** HSQC (600 and 150 MHz,  $\text{MeOH-}d_4$ ) spectrum of compound **5**.

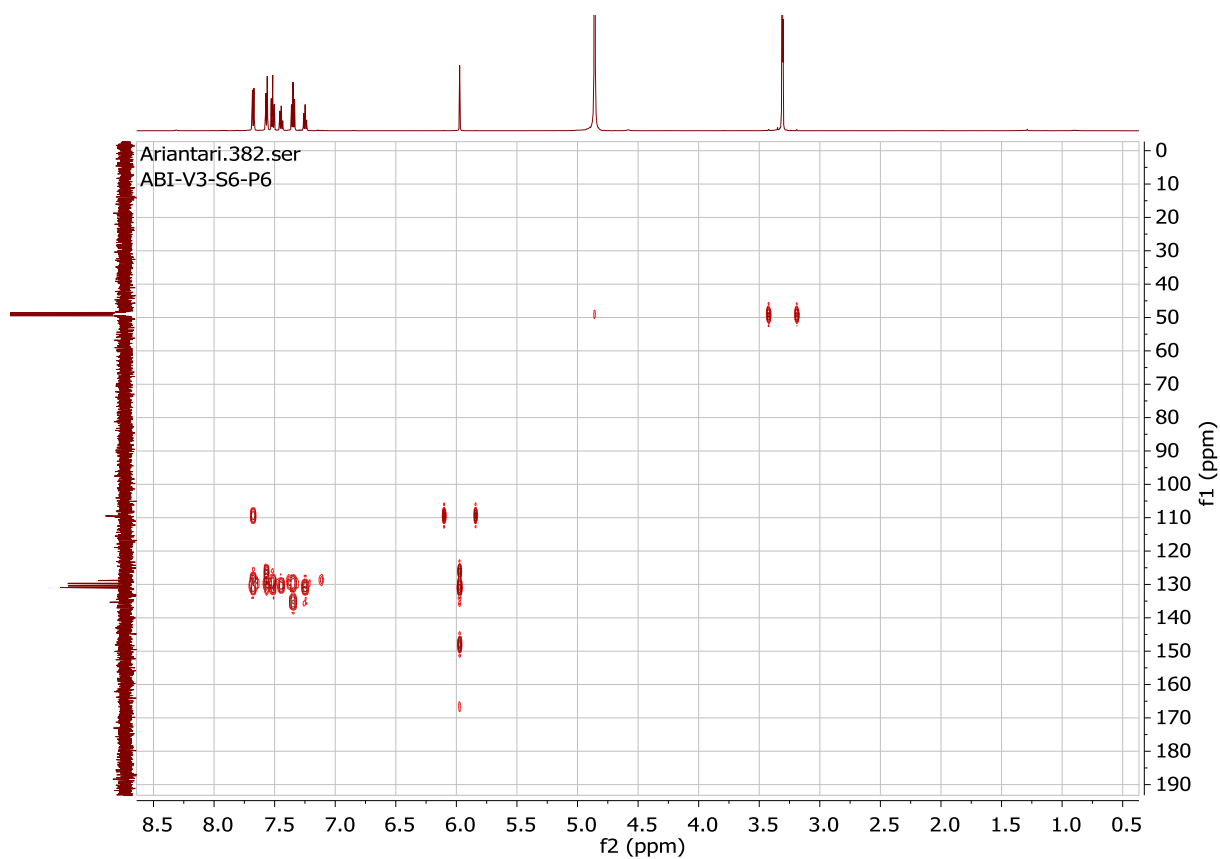

**Figure S38.** HMBC (600 and 150 MHz, MeOH- $d_4$ ) spectrum of compound **5**.

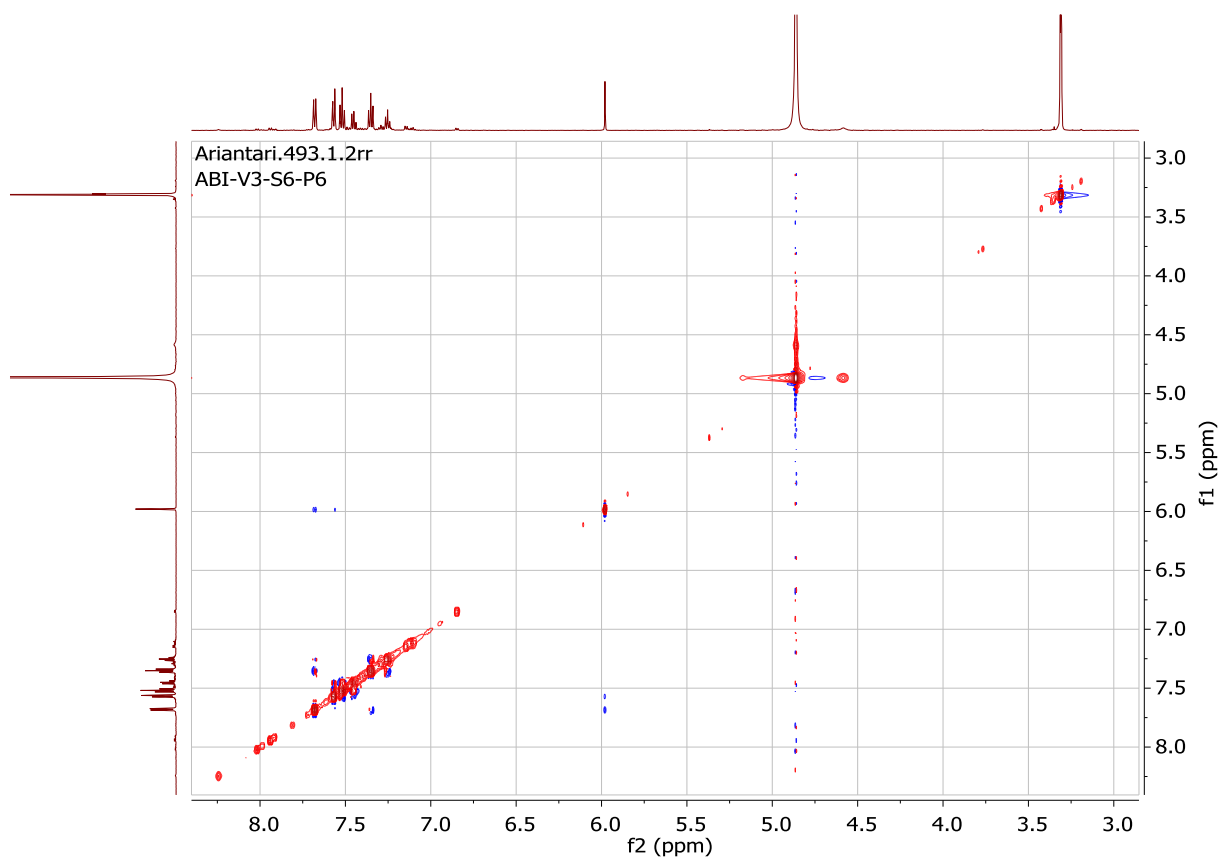

**Figure S39.** NOESY (600 MHz, MeOH- $d_4$ ) spectrum of compound **5**.



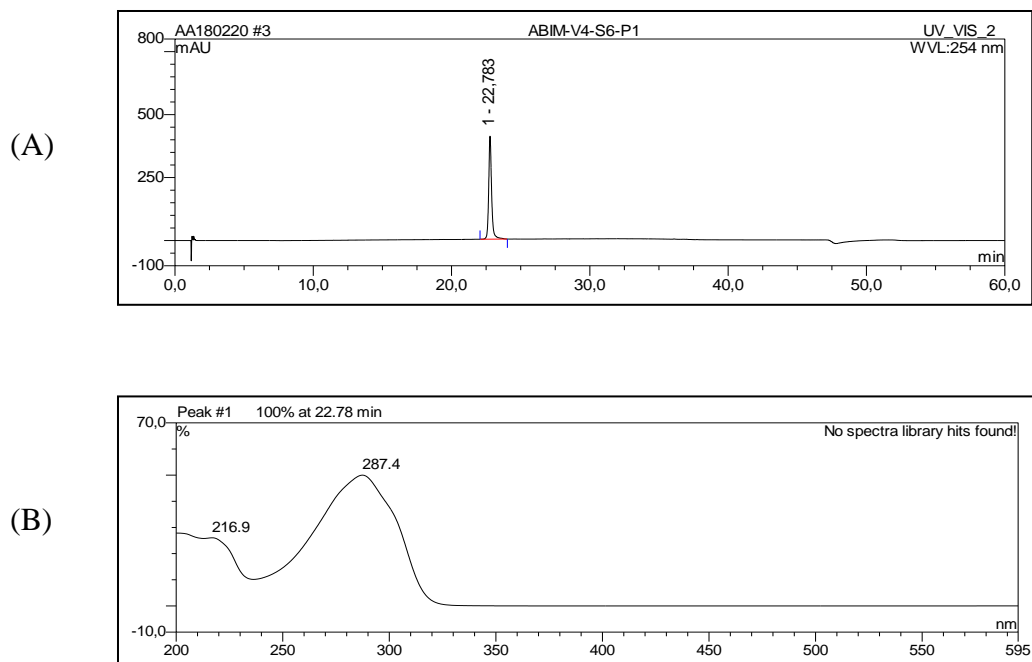

**Figure S40.** HPLC chromatogram (A) and UV spectrum (B) of compound **6**.

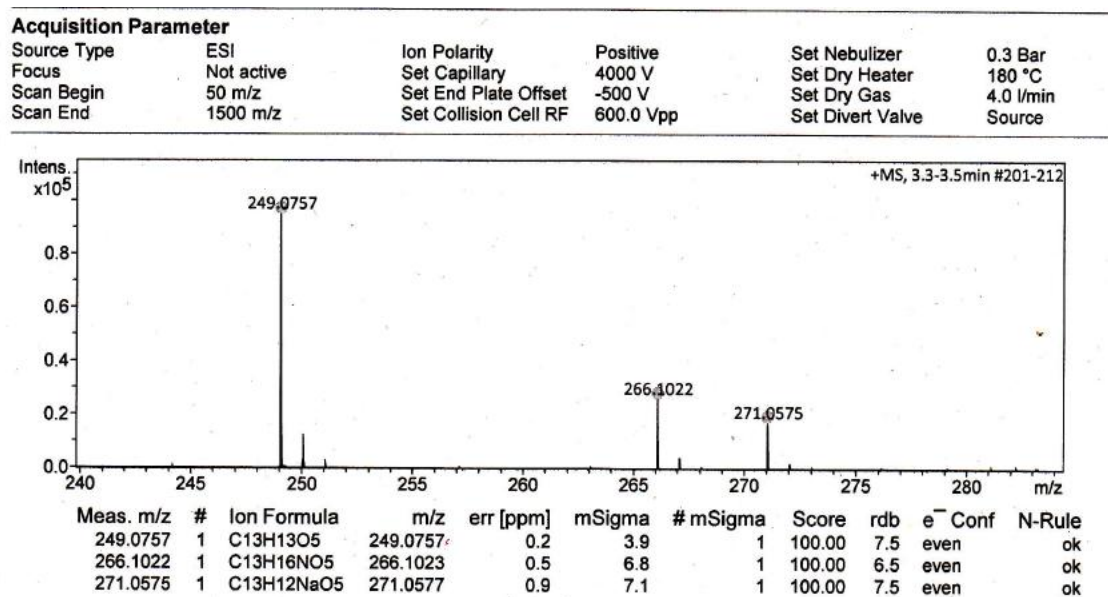

**Figure S41.** HRESIMS spectrum of compound **6**.

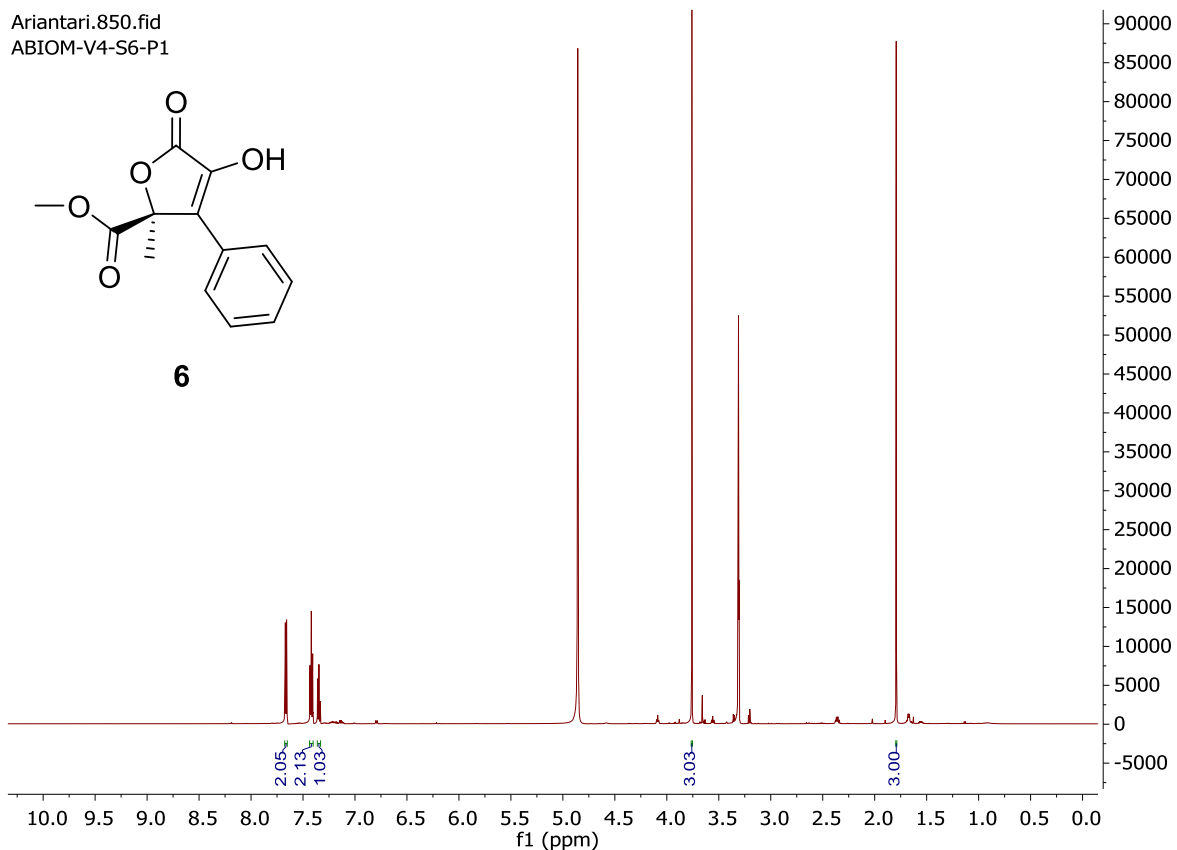

**Figure S42.**  $^1\text{H}$  NMR (600 MHz,  $\text{MeOH-}d_4$ ) spectrum of compound **6**.

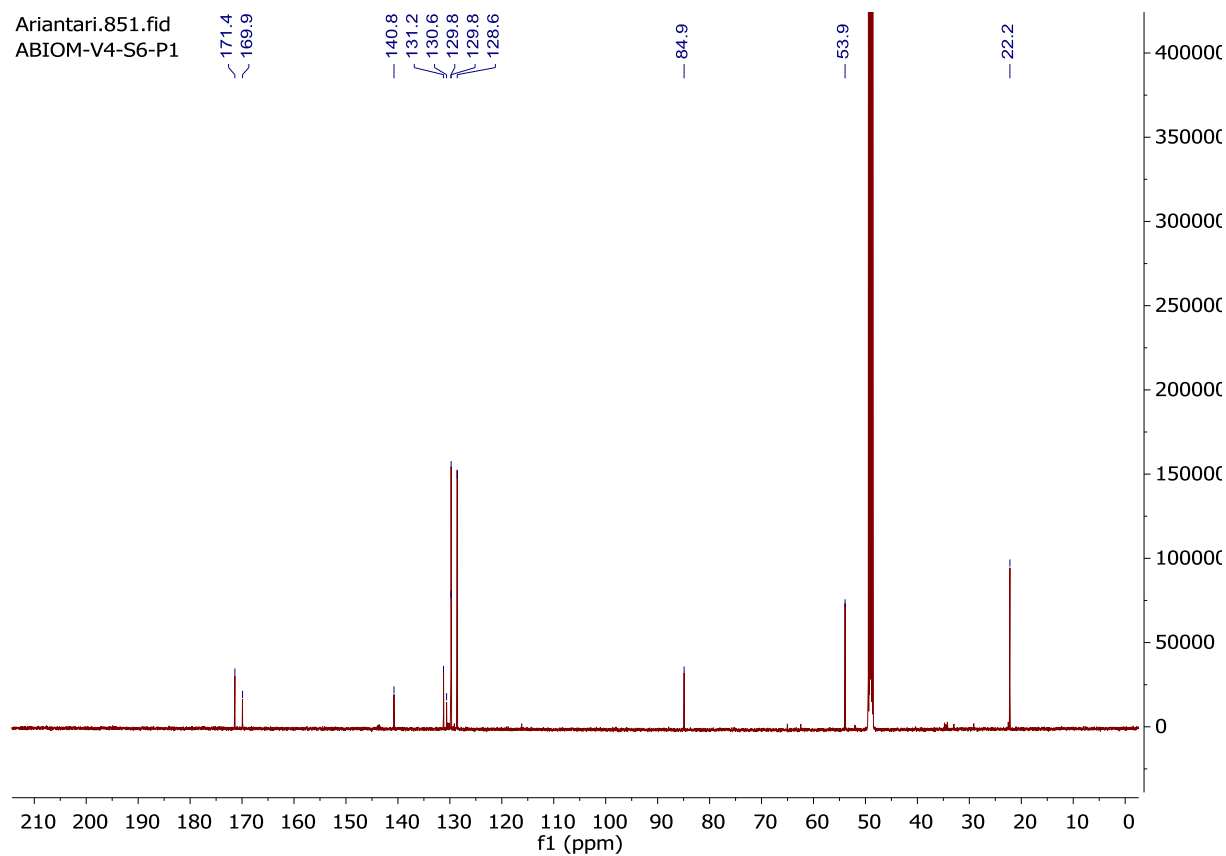

**Figure S43.**  $^{13}\text{C}$  NMR (150 MHz,  $\text{MeOH-}d_4$ ) spectrum of compound **6**.

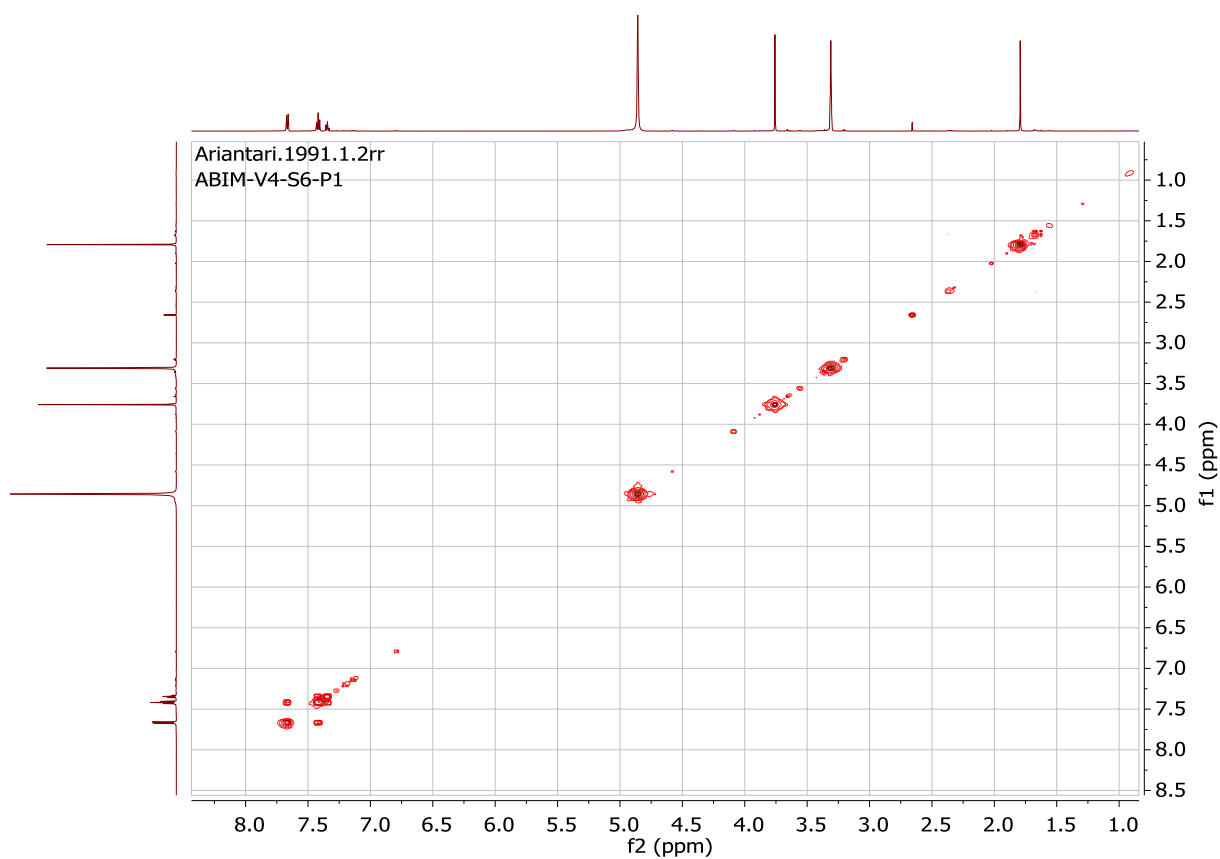

**Figure S44.** <sup>1</sup>H-<sup>1</sup>H COSY (600 MHz, MeOH-*d*<sub>4</sub>) spectrum of compound **6**.

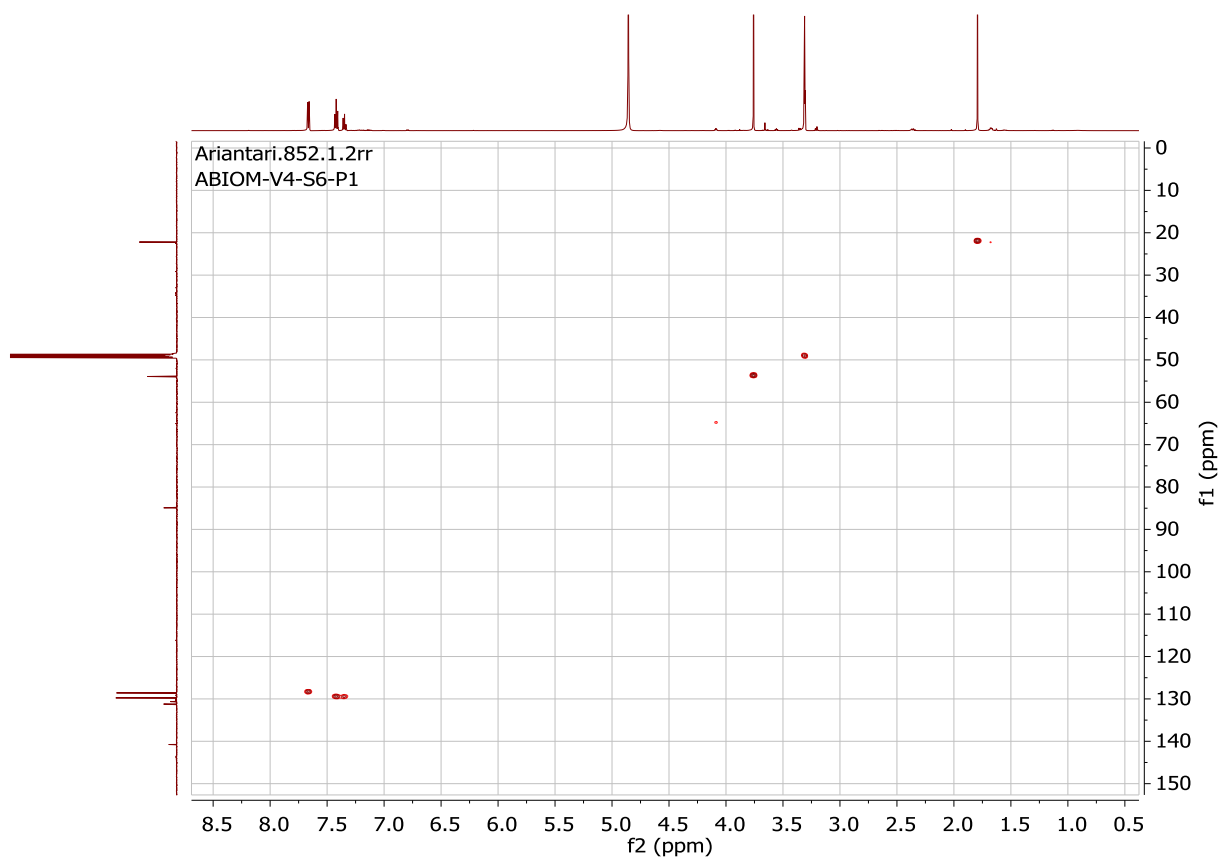

**Figure S45.** HSQC (600 and 150 MHz, MeOH-*d*<sub>4</sub>) spectrum of compound **6**.

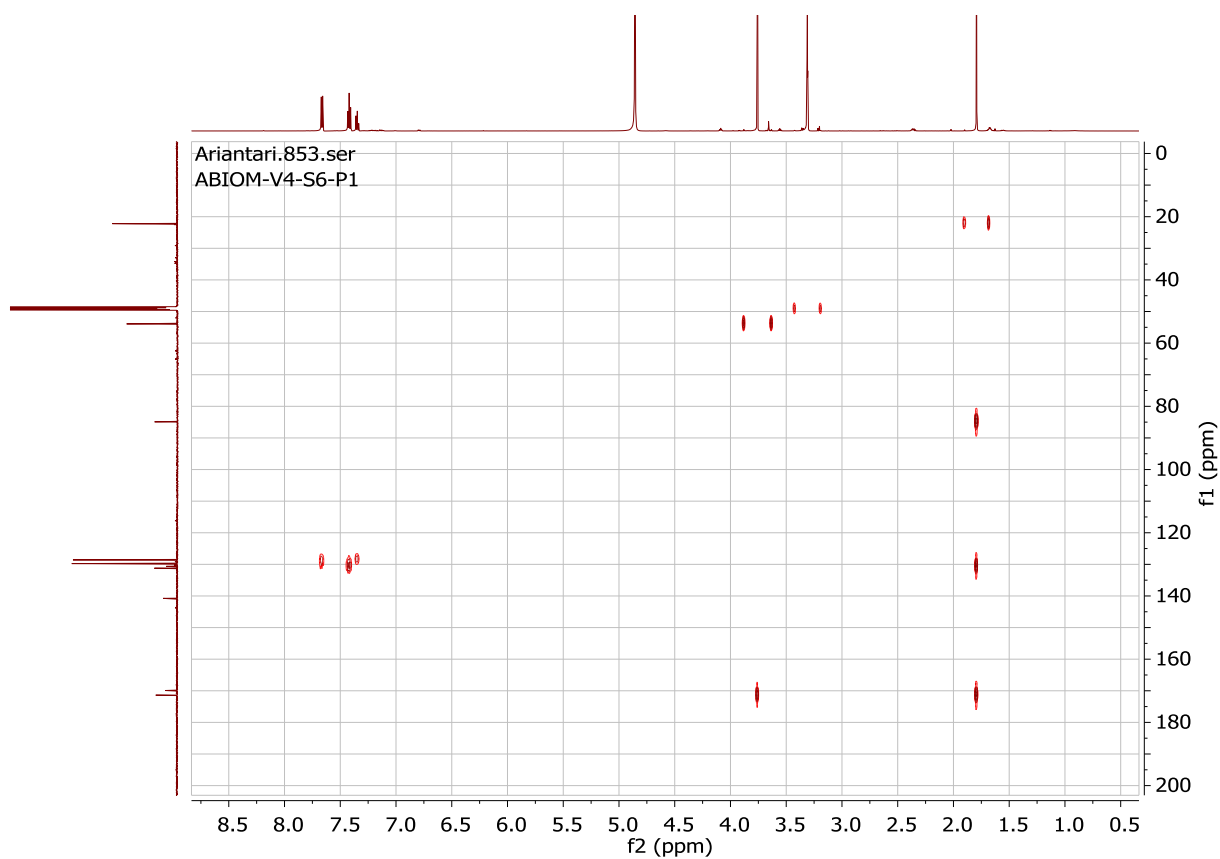

**Figure S46.** HMBC (600 and 150 MHz, MeOH-*d*<sub>4</sub>) spectrum of compound **6**.

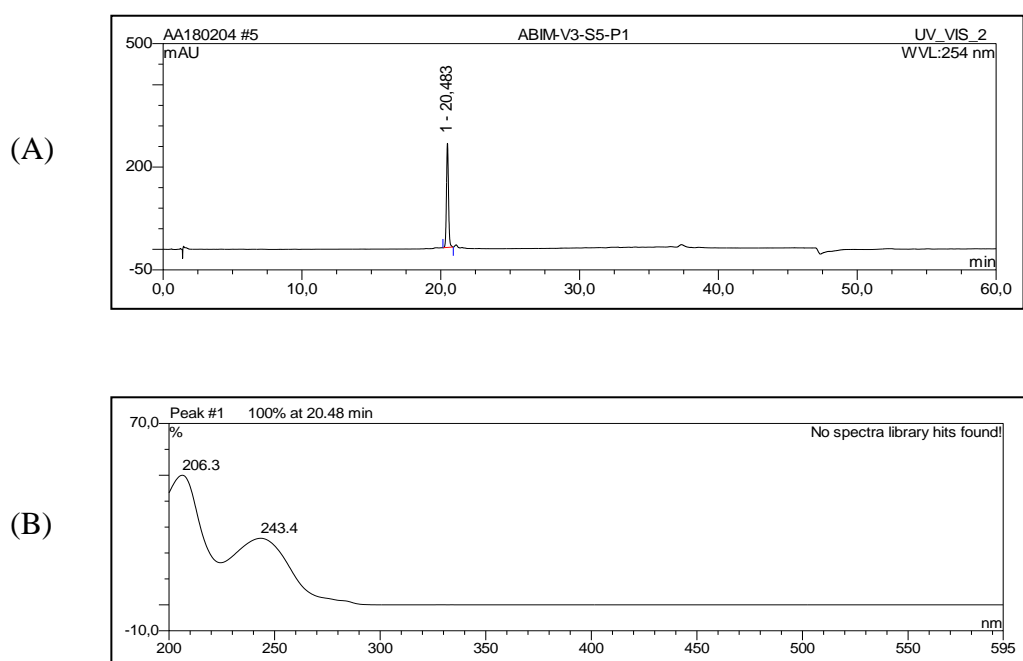

**Figure S47.** HPLC chromatogram (A) and UV spectrum (B) of compound **7**.

| Acquisition Parameter |            |                       |           |                  |           |
|-----------------------|------------|-----------------------|-----------|------------------|-----------|
| Source Type           | ESI        | Ion Polarity          | Positive  | Set Nebulizer    | 0.3 Bar   |
| Focus                 | Not active | Set Capillary         | 4000 V    | Set Dry Heater   | 180 °C    |
| Scan Begin            | 50 m/z     | Set End Plate Offset  | -500 V    | Set Dry Gas      | 4.0 l/min |
| Scan End              | 1500 m/z   | Set Collision Cell RF | 600.0 Vpp | Set Divert Valve | Source    |

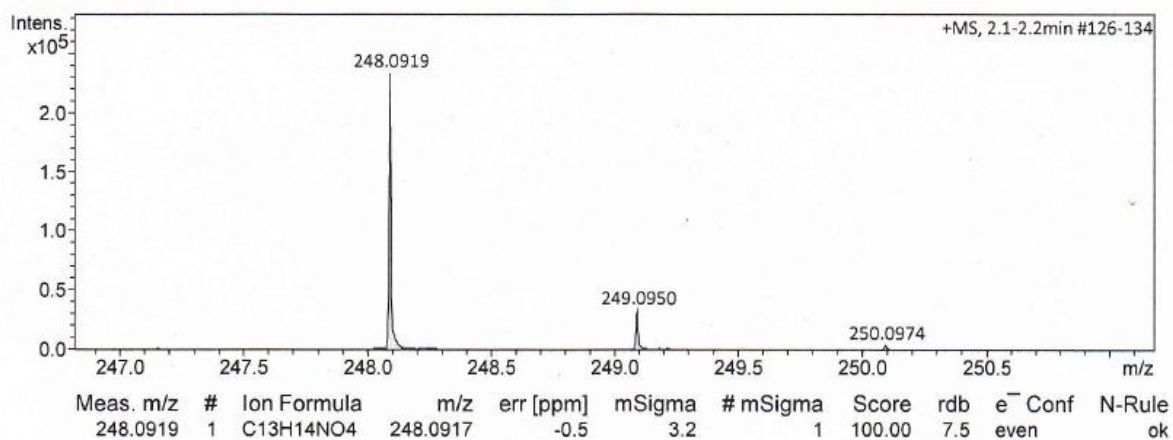

**Figure S48.** HRESIMS spectrum of compound **7**.

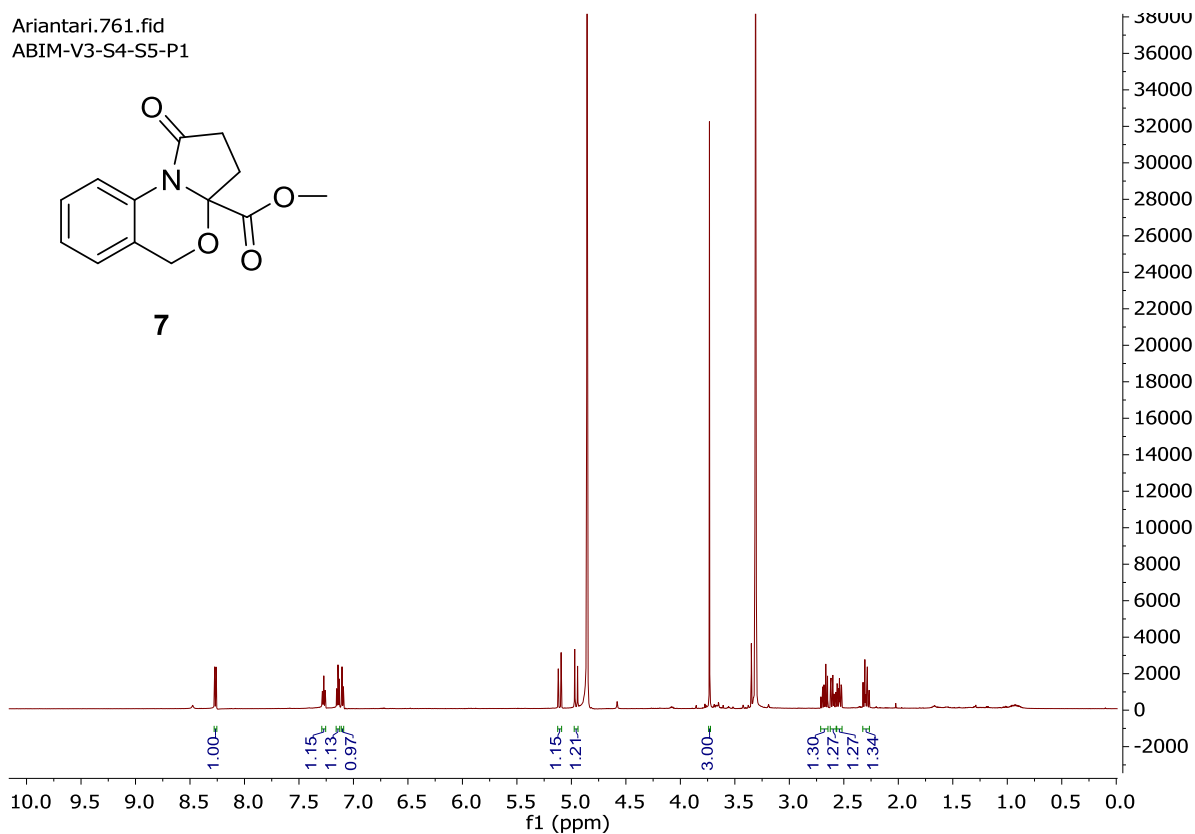

**Figure S49.** <sup>1</sup>H NMR (600 MHz, MeOH-*d*<sub>4</sub>) spectrum of compound **7**.

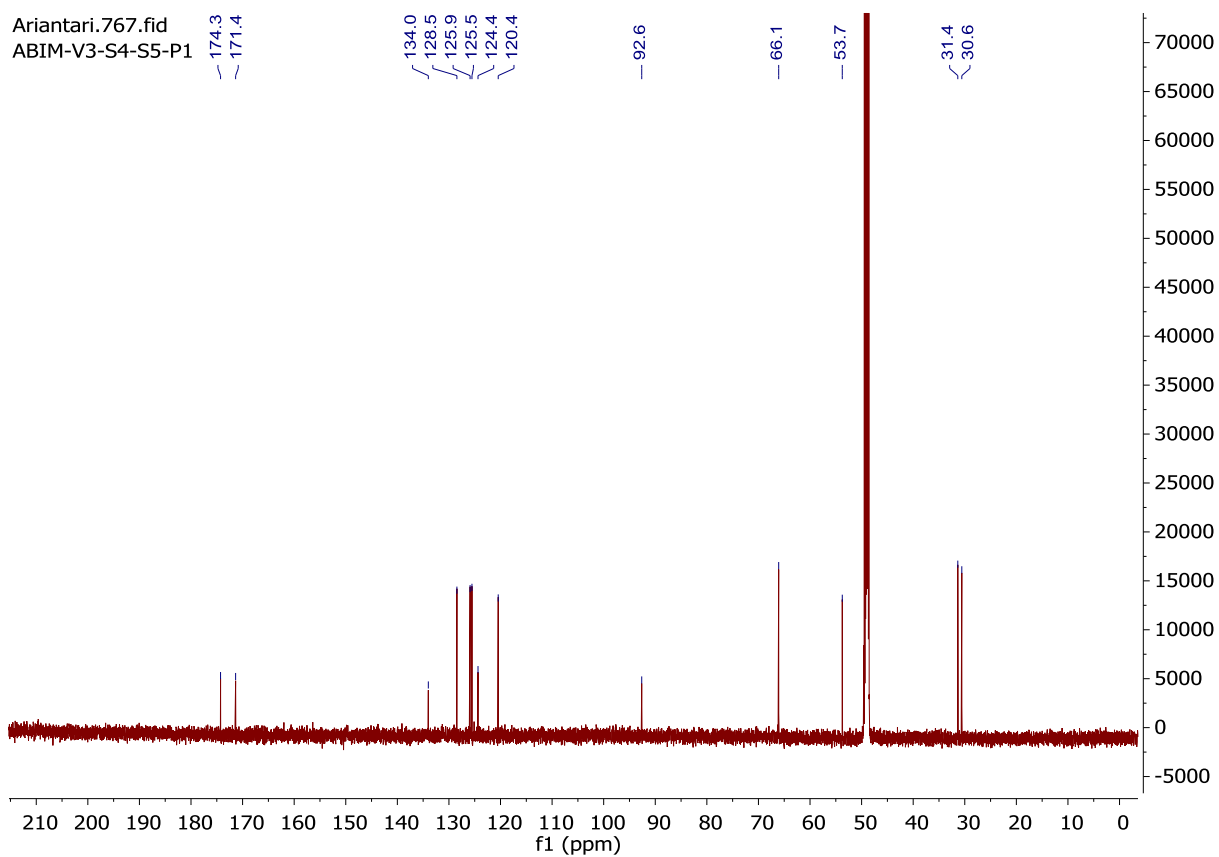

**Figure S50.**  $^{13}\text{C}$  NMR (150 MHz,  $\text{MeOH-}d_4$ ) spectrum of compound **7**.

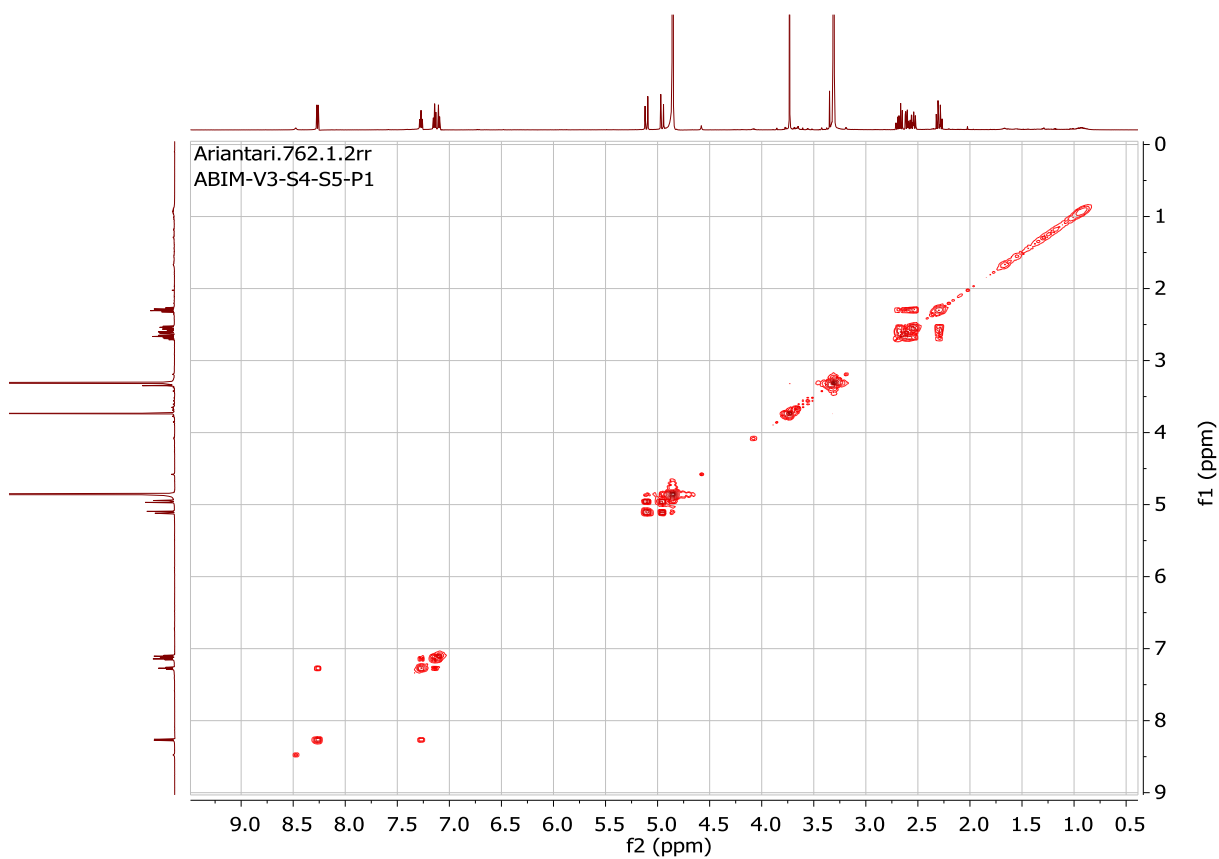

**Figure S51.**  $^1\text{H-}^1\text{H}$  COSY (600 MHz,  $\text{MeOH-}d_4$ ) spectrum of compound **7**.

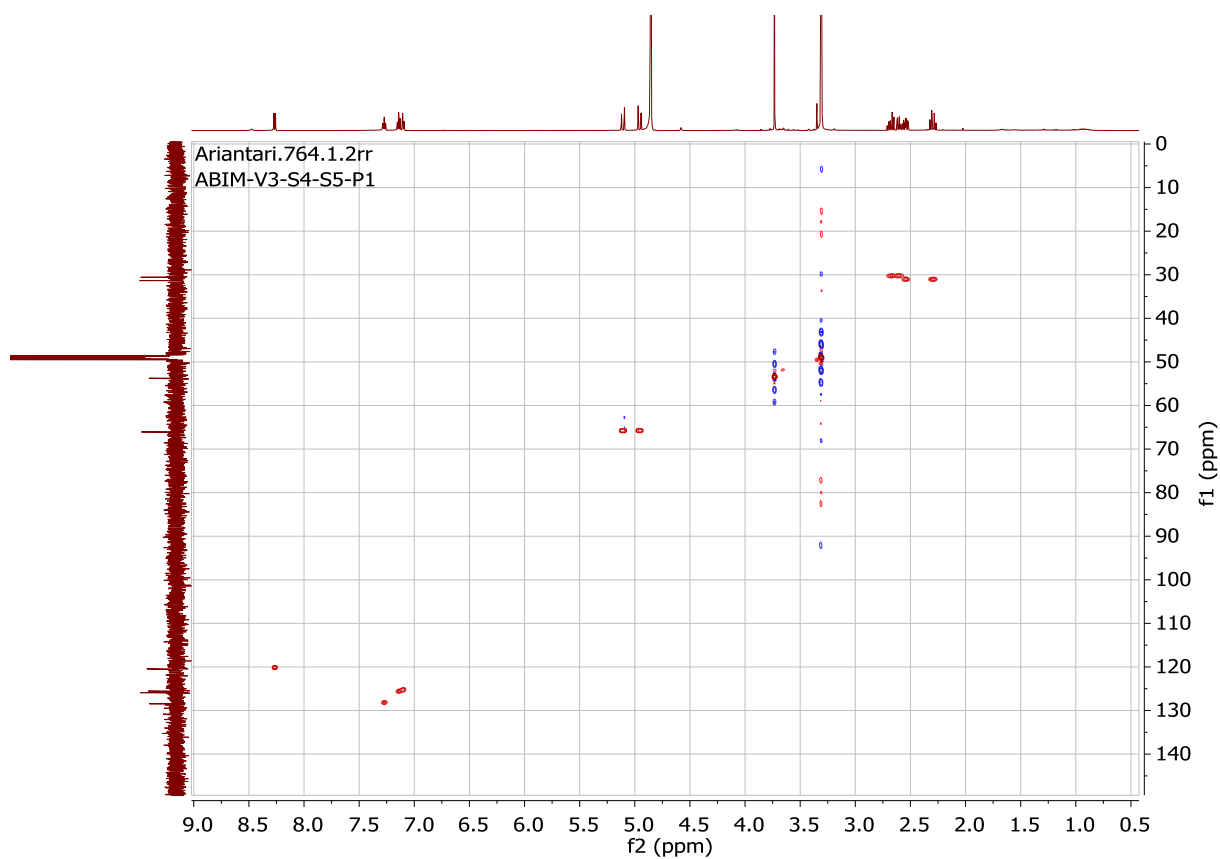

Figure S52. HSQC (600 and 150 MHz, MeOH- $d_4$ ) spectrum of compound 7.

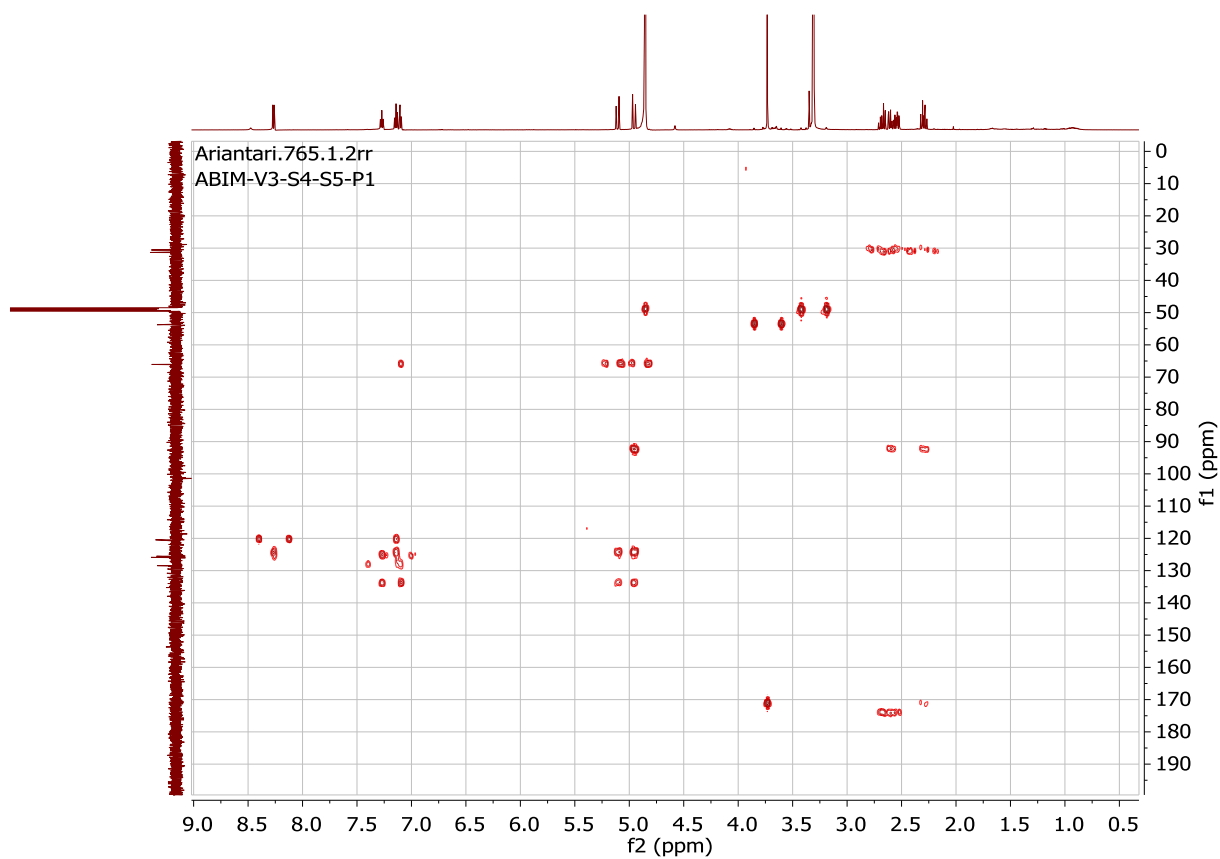

Figure S53. HMBC (600 and 150 MHz, MeOH- $d_4$ ) spectrum of compound 7.

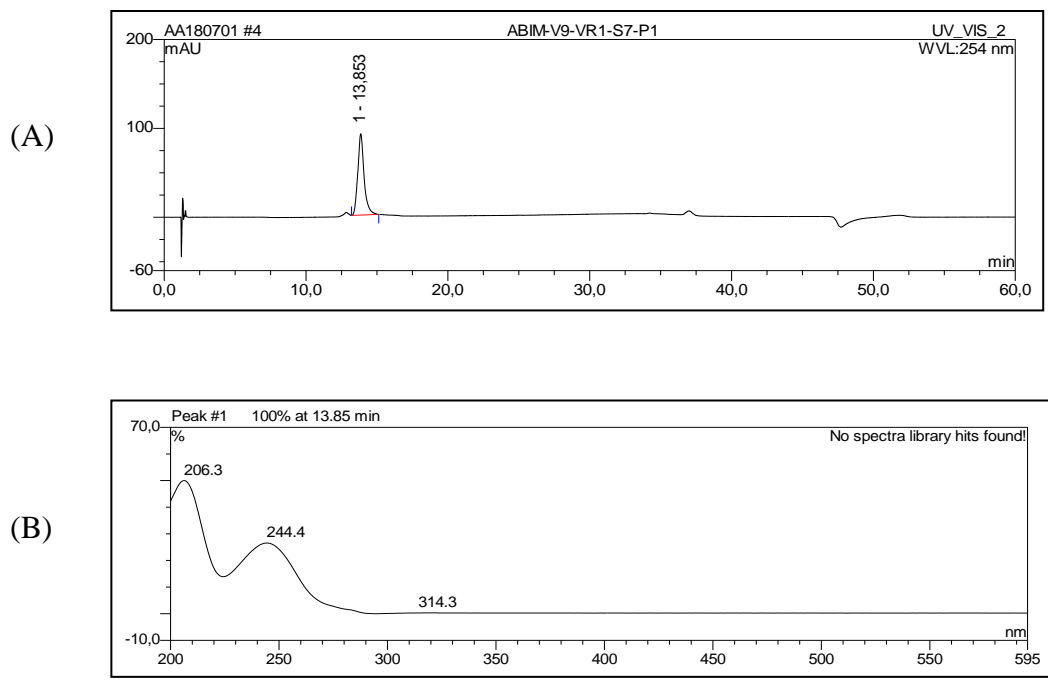

**Figure S54.** HPLC chromatogram (A) and UV spectrum (B) of compound **8**.

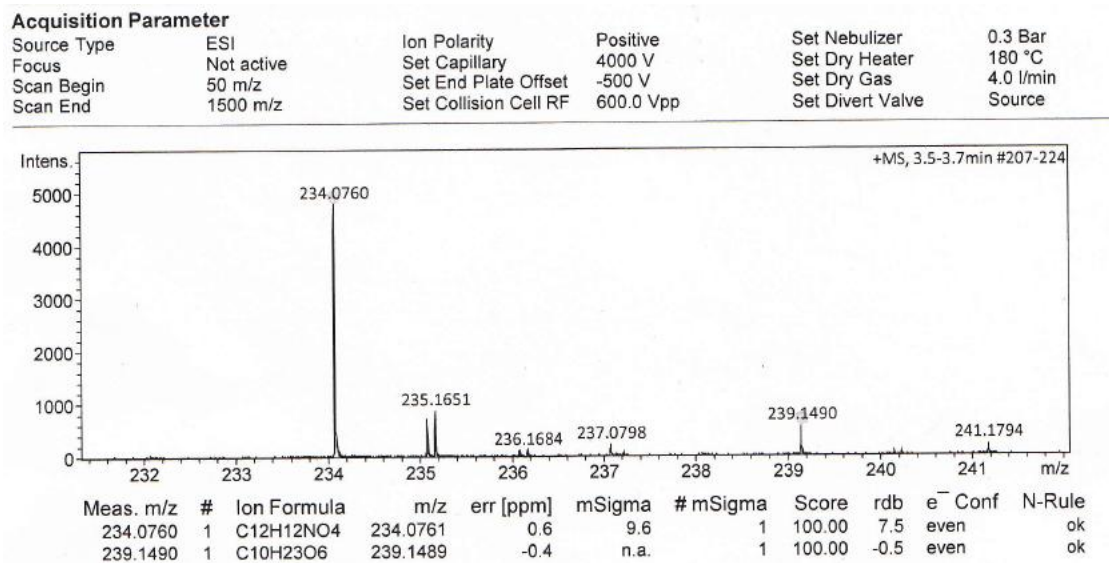

**Figure S55.** HRESIMS spectrum of compound **8**.



Ariantari.960.1.1r  
ABIM-V9-VR1-S7-P1

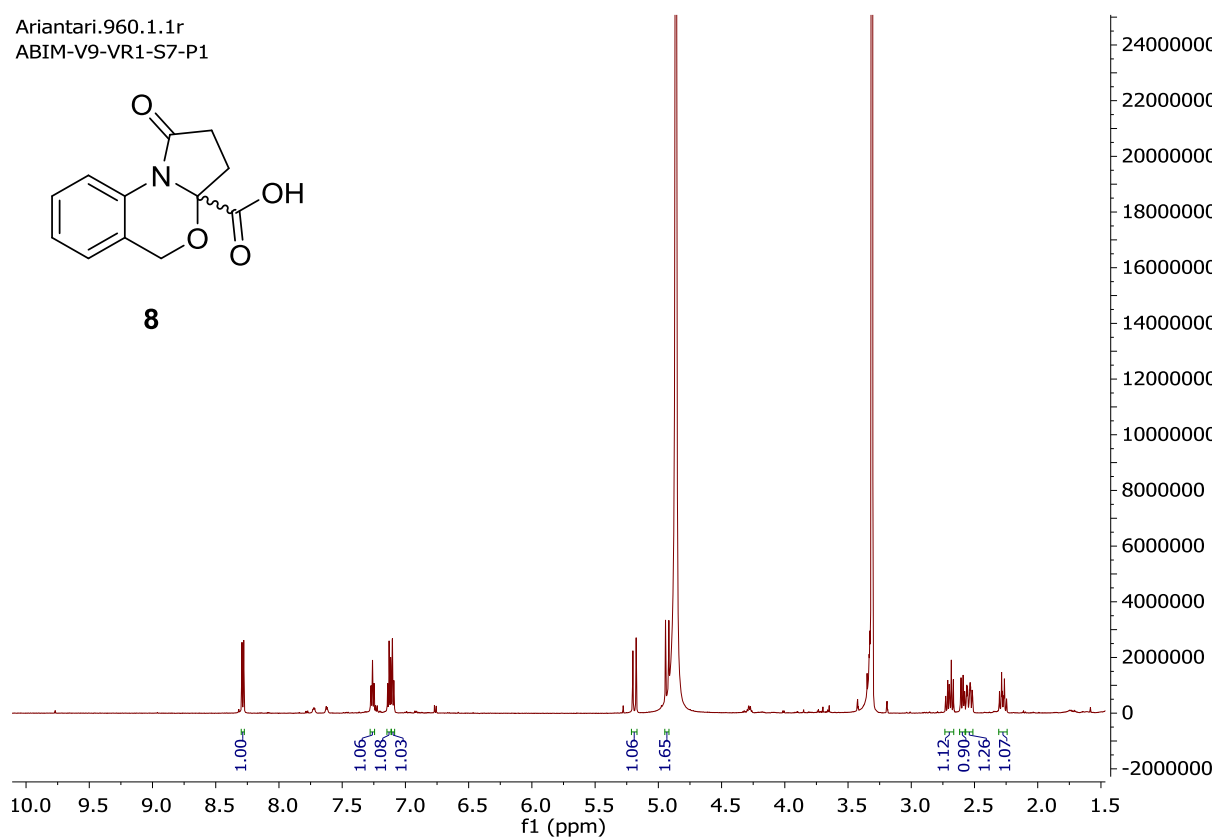

**Figure S56.**  $^1\text{H}$  NMR (600 MHz,  $\text{MeOH-}d_4$ ) spectrum of compound **8**.

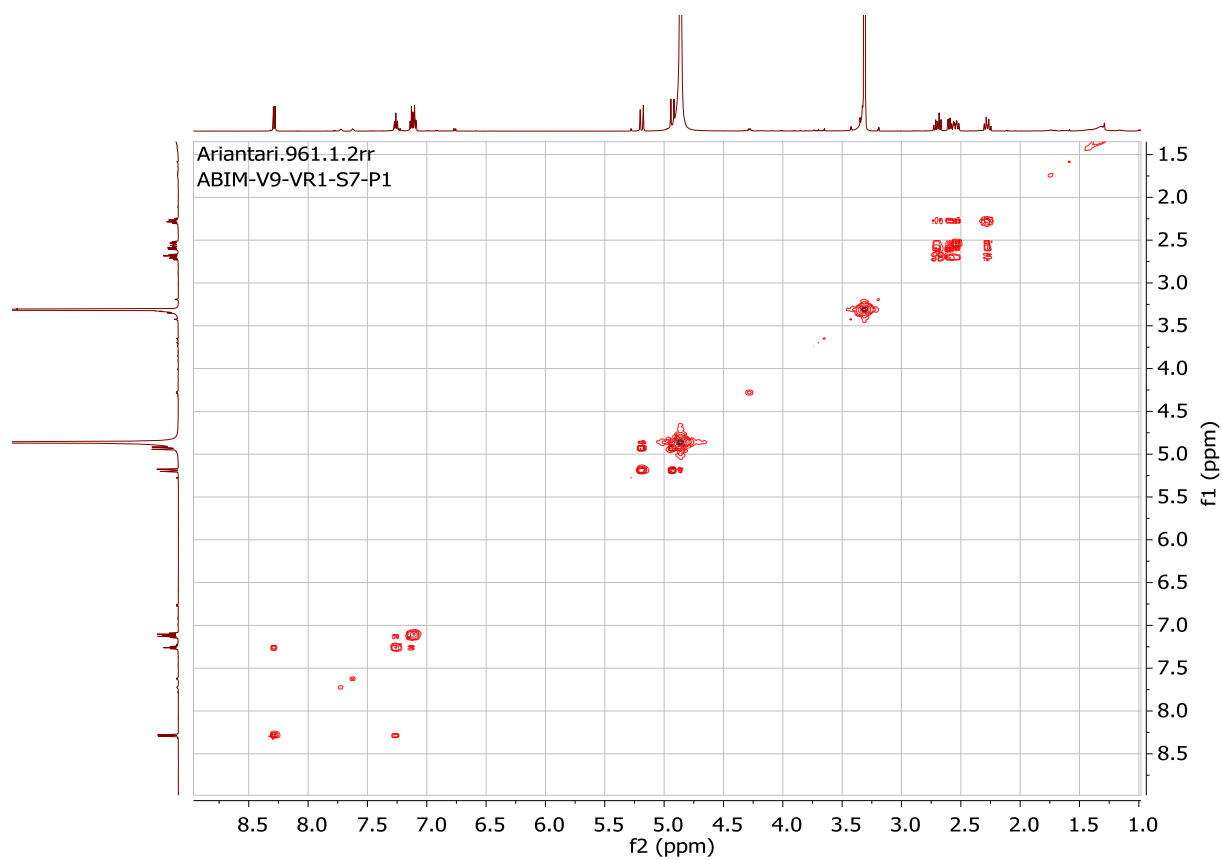

**Figure S57.**  $^1\text{H}$ - $^1\text{H}$  COSY (600 MHz,  $\text{MeOH-}d_4$ ) spectrum of compound **8**.

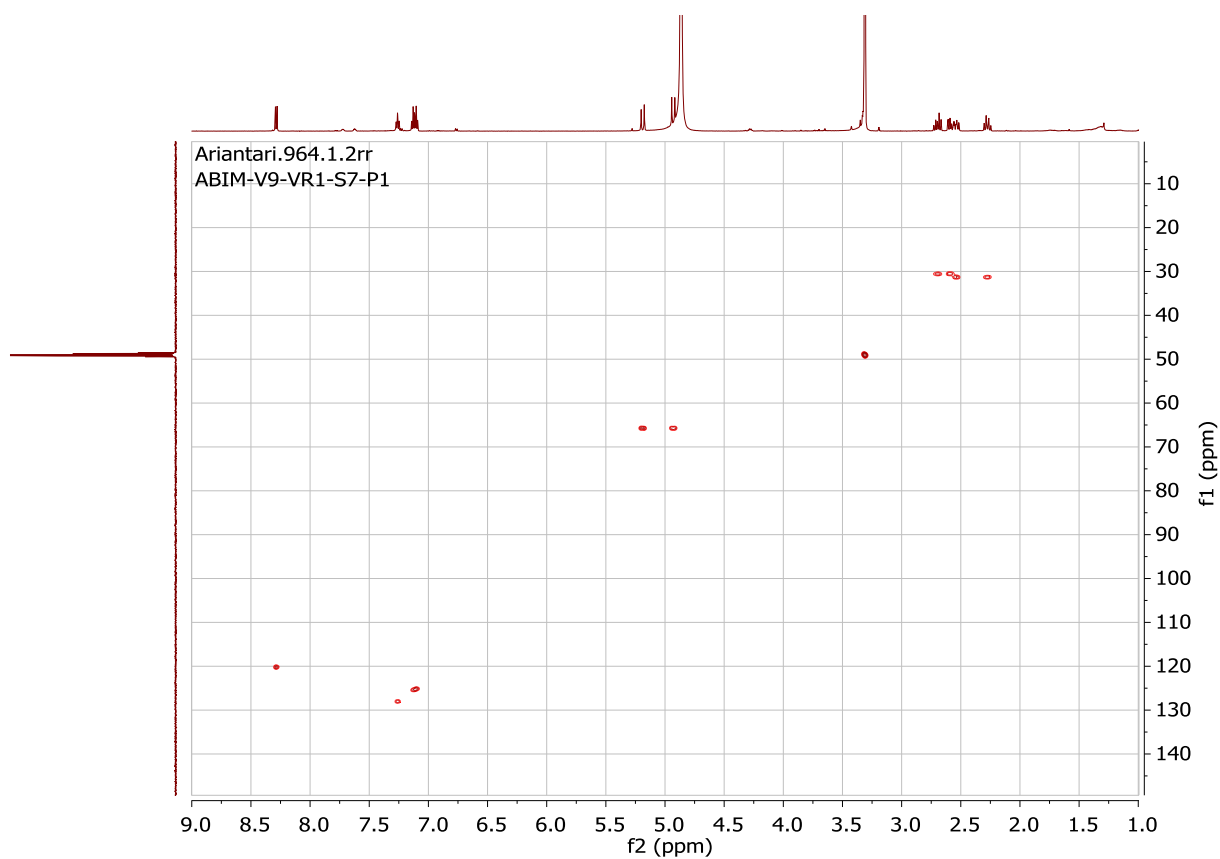

**Figure S58.** HSQC (600 and 150 MHz, MeOH- $d_4$ ) spectrum of compound **8**.

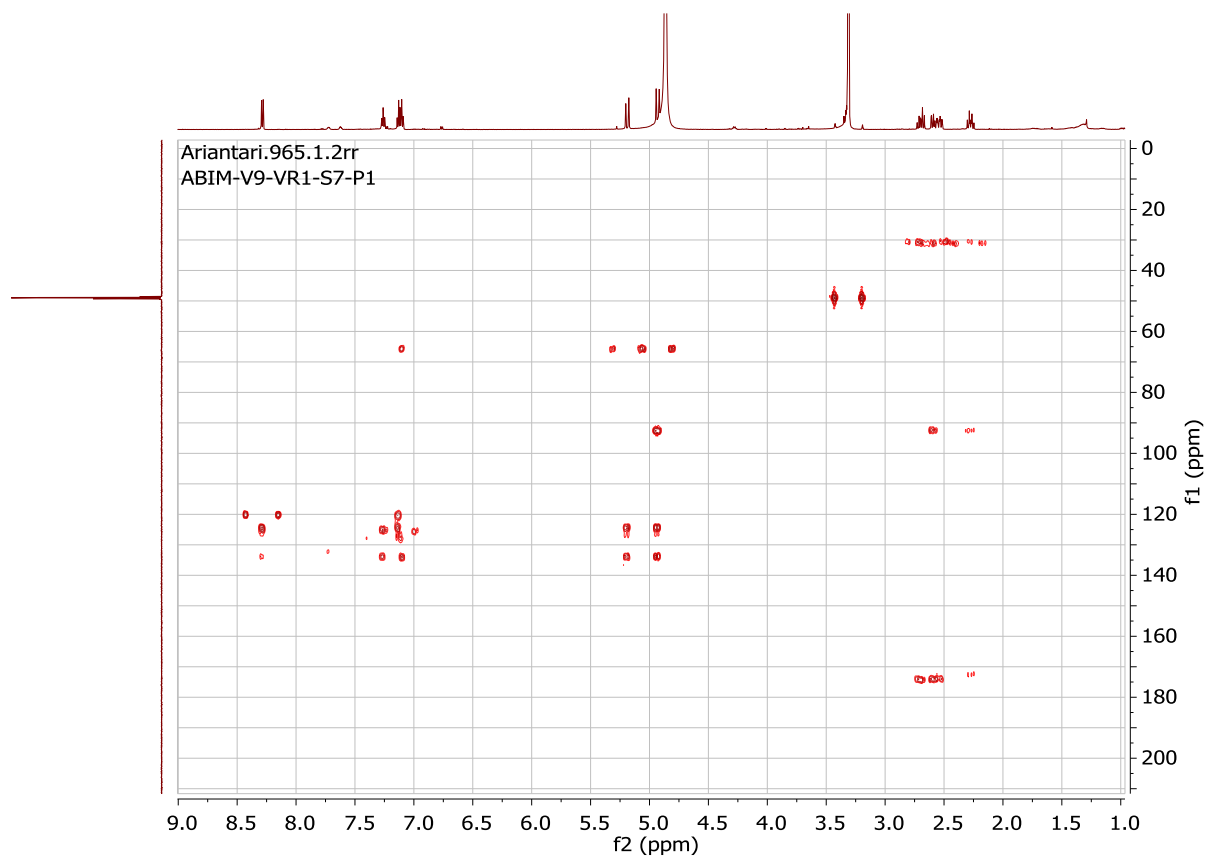

**Figure S59.** HMBC (600 and 150 MHz, MeOH- $d_4$ ) spectrum of compound **8**.

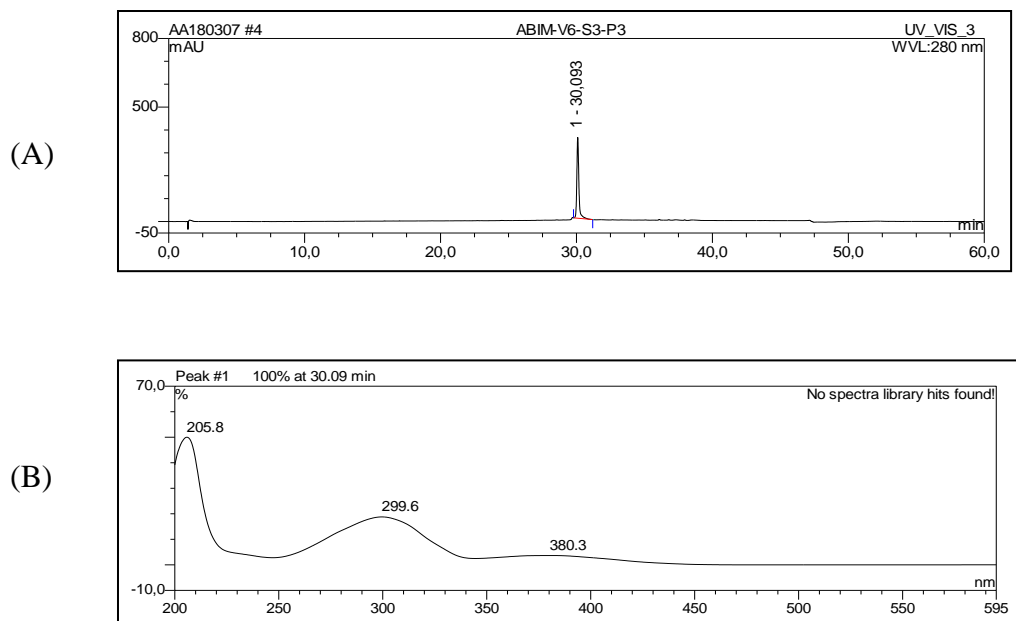

**Figure S60.** HPLC chromatogram (A) and UV spectrum (B) of compound **9**.

**Acquisition Parameter**

|             |            |                       |           |                  |           |
|-------------|------------|-----------------------|-----------|------------------|-----------|
| Source Type | ESI        | Ion Polarity          | Positive  | Set Nebulizer    | 0.3 Bar   |
| Focus       | Not active | Set Capillary         | 4000 V    | Set Dry Heater   | 180 °C    |
| Scan Begin  | 50 m/z     | Set End Plate Offset  | -500 V    | Set Dry Gas      | 4.0 l/min |
| Scan End    | 1500 m/z   | Set Collision Cell RF | 600.0 Vpp | Set Divert Valve | Source    |

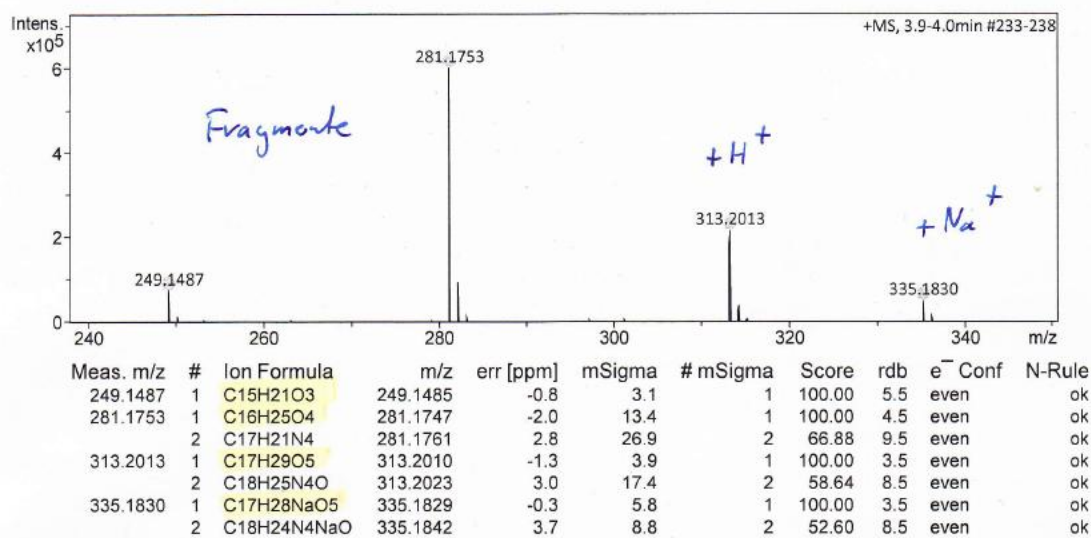

**Figure S61.** HRESIMS spectrum of compound **9**.

Ariantari.870.1.1r  
ABIM-V6-S3-P3

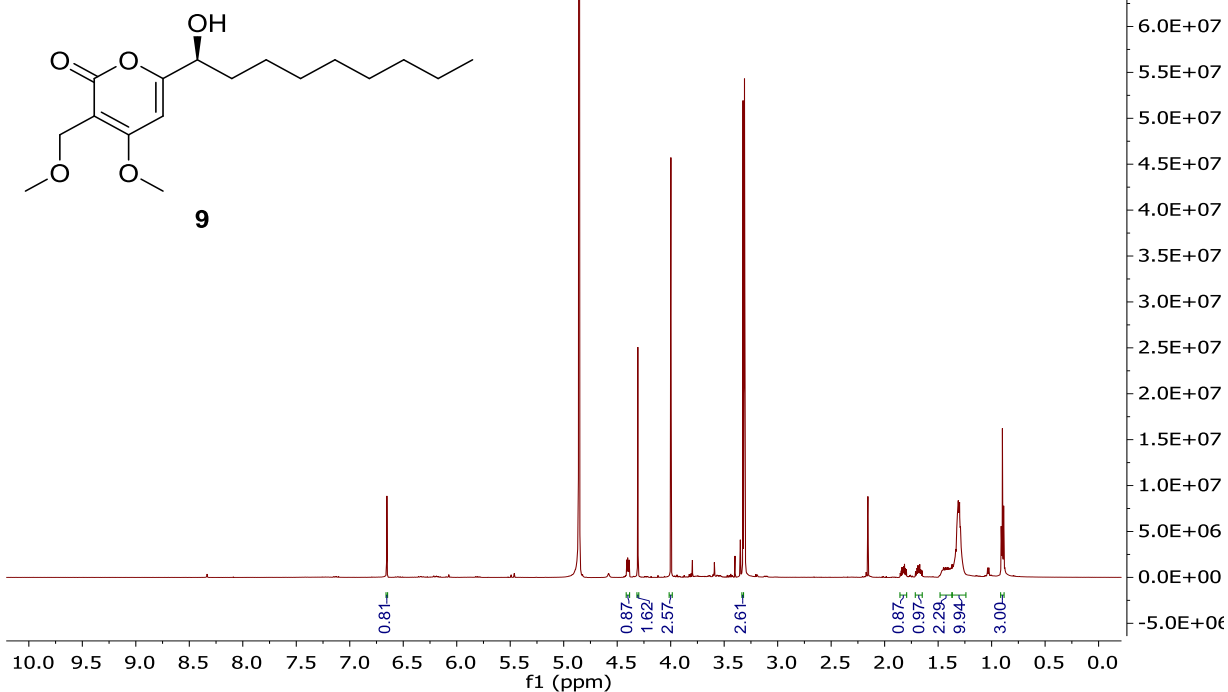

Figure S62.  $^1\text{H}$  NMR (600 MHz,  $\text{MeOH-}d_4$ ) spectrum of compound **9**.

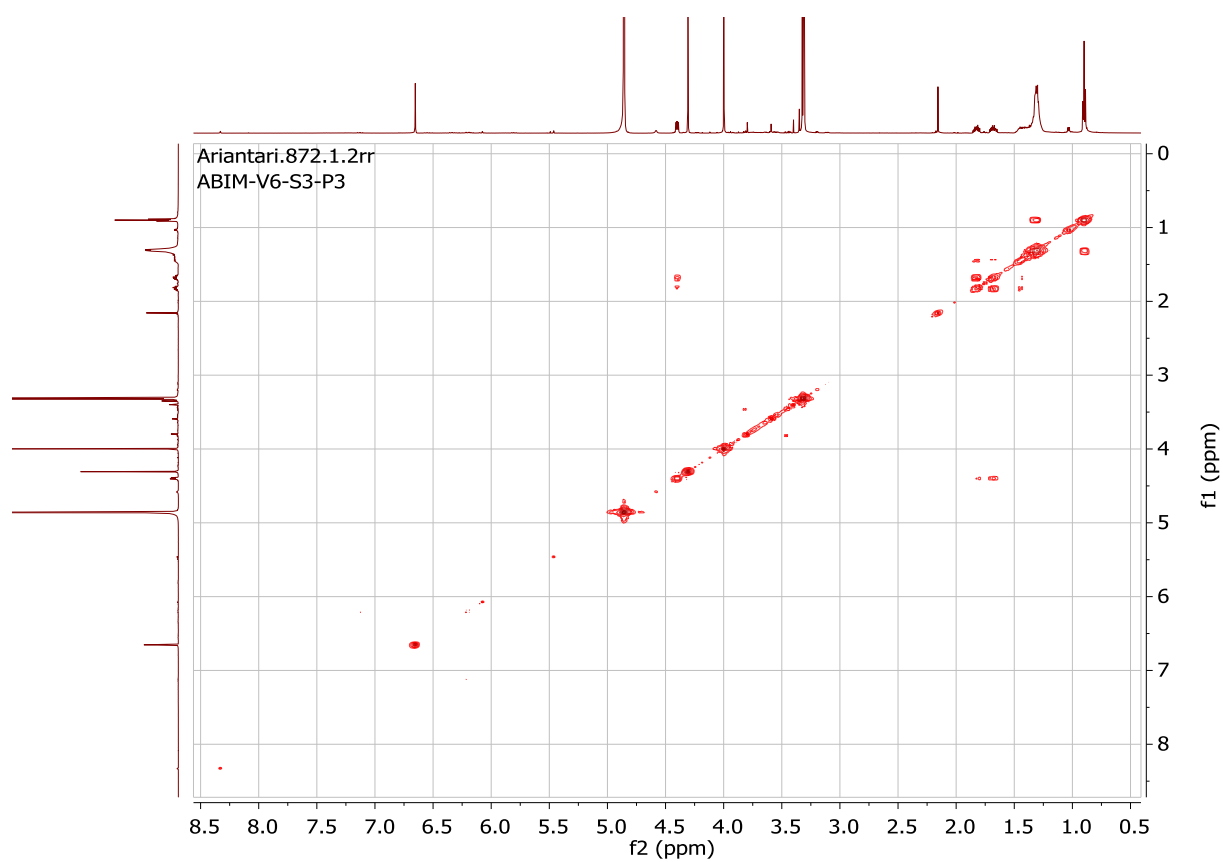

Figure S63.  $^1\text{H-}^1\text{H}$  COSY (600 MHz,  $\text{MeOH-}d_4$ ) spectrum of compound **9**.

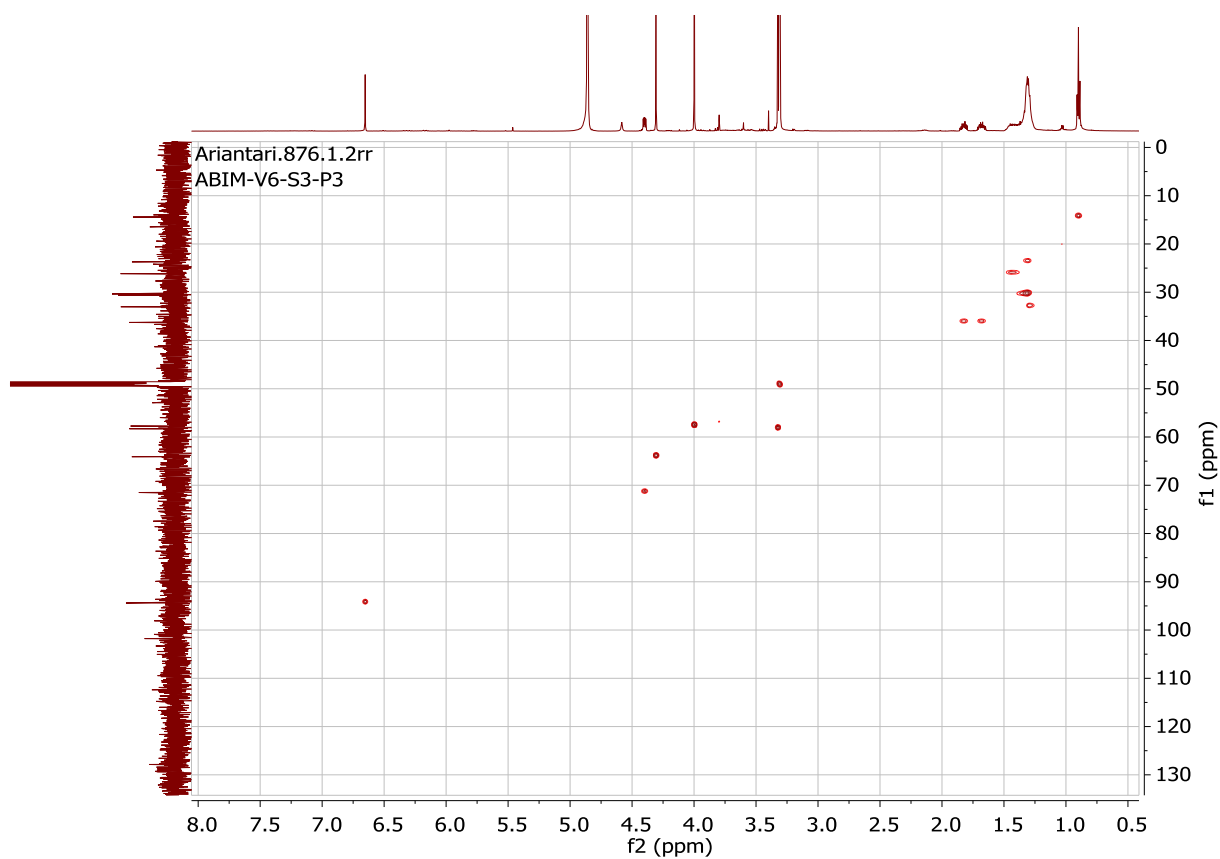

**Figure S64.** HSQC (600 and 150 MHz, MeOH- $d_4$ ) spectrum of compound **9**.

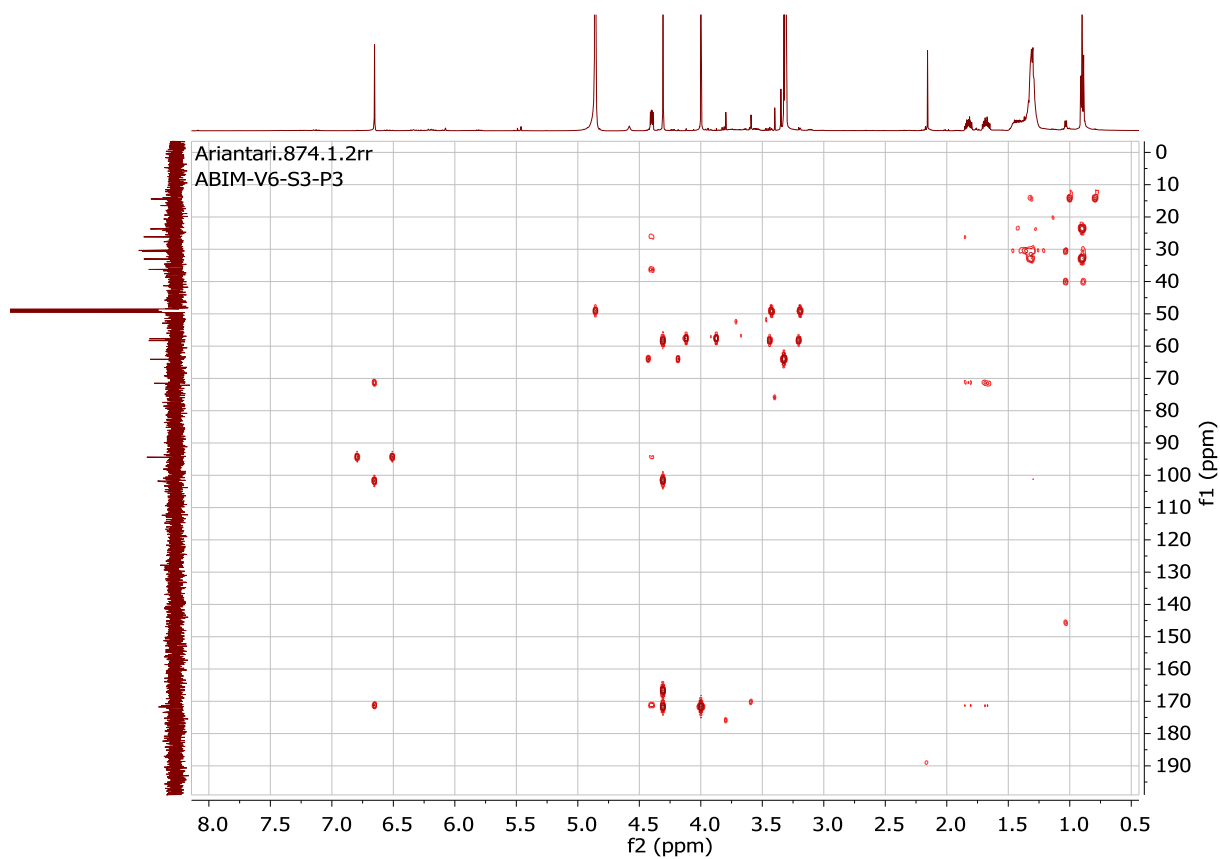

**Figure S65.** HMBC (600 and 150 MHz, MeOH- $d_4$ ) spectrum of compound **9**.

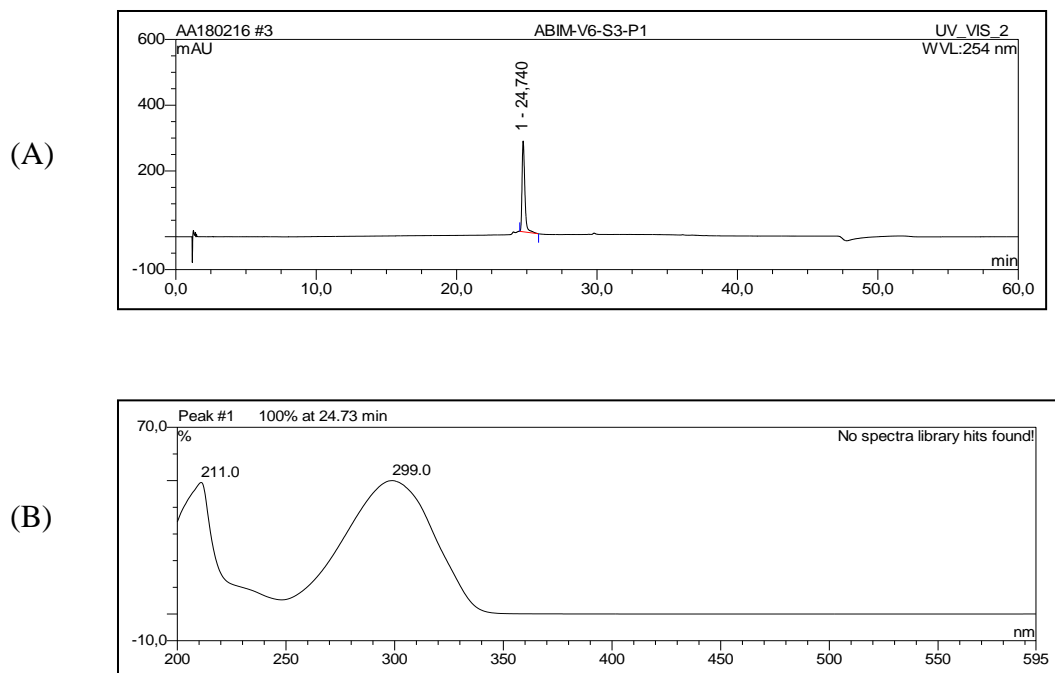

**Figure S66.** HPLC chromatogram (A) and UV spectrum (B) of compound **10**.

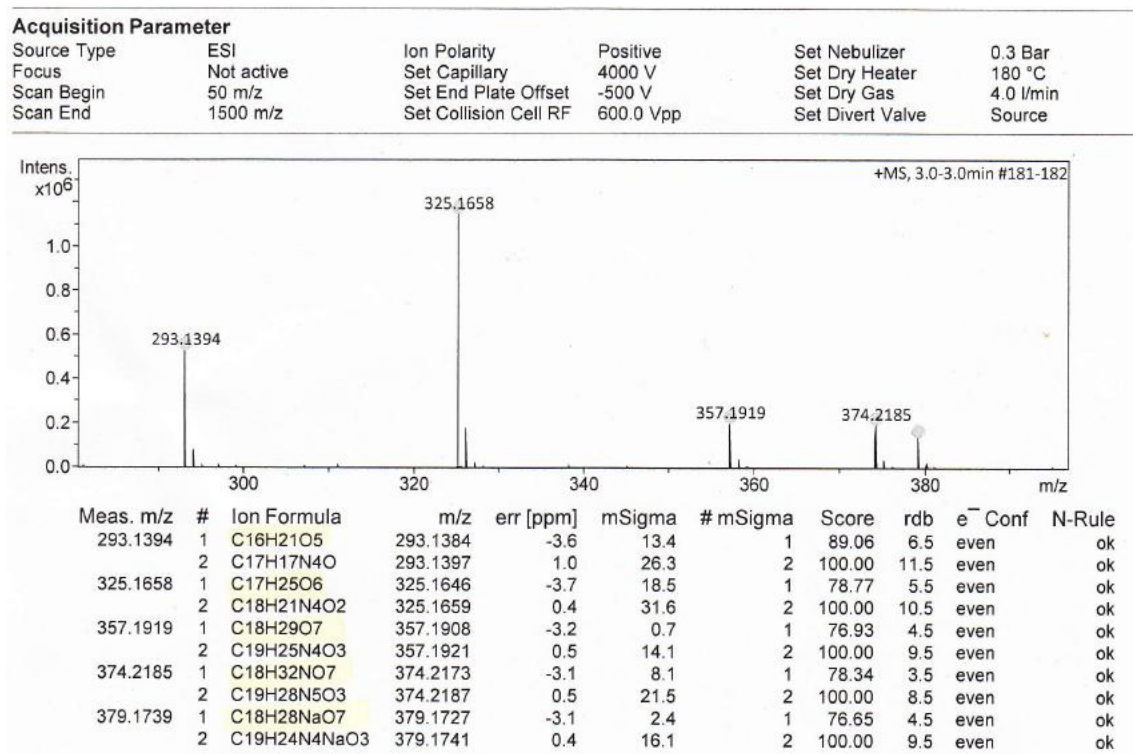

**Figure S67.** HRESIMS spectrum of compound **10**.

Ariantari.780.fid  
ABIM-V6-S3-P1

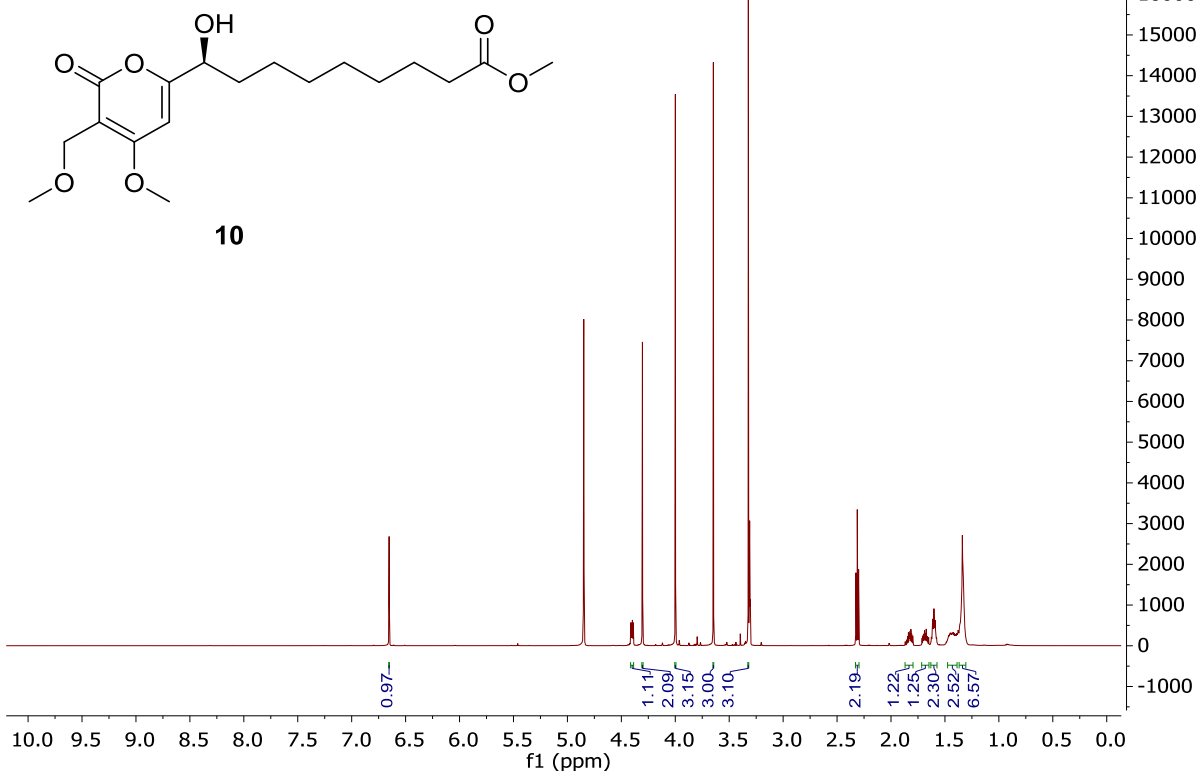

**Figure S68.**  $^1\text{H}$  NMR (600 MHz,  $\text{MeOH-}d_4$ ) spectrum of compound **10**.

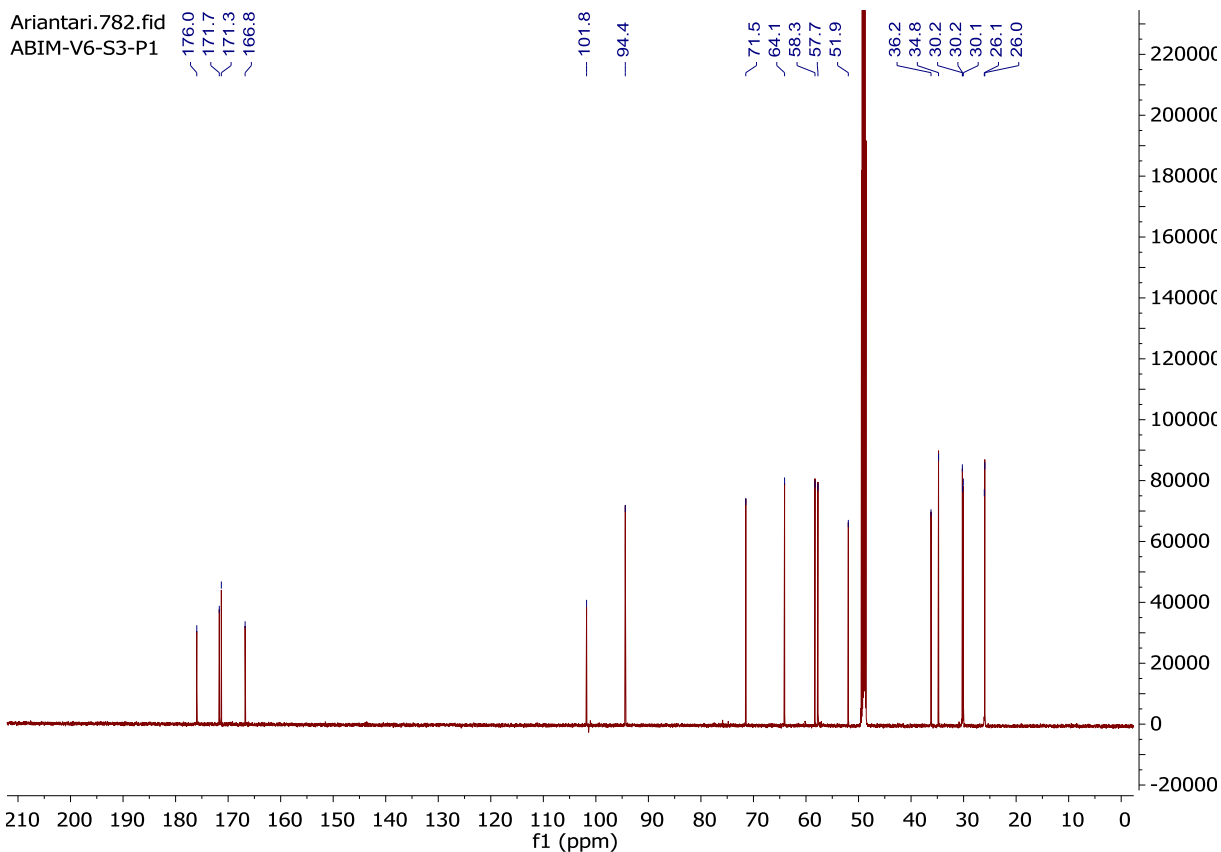

**Figure S69.**  $^{13}\text{C}$  NMR (150 MHz,  $\text{MeOH-}d_4$ ) spectrum of compound **10**.

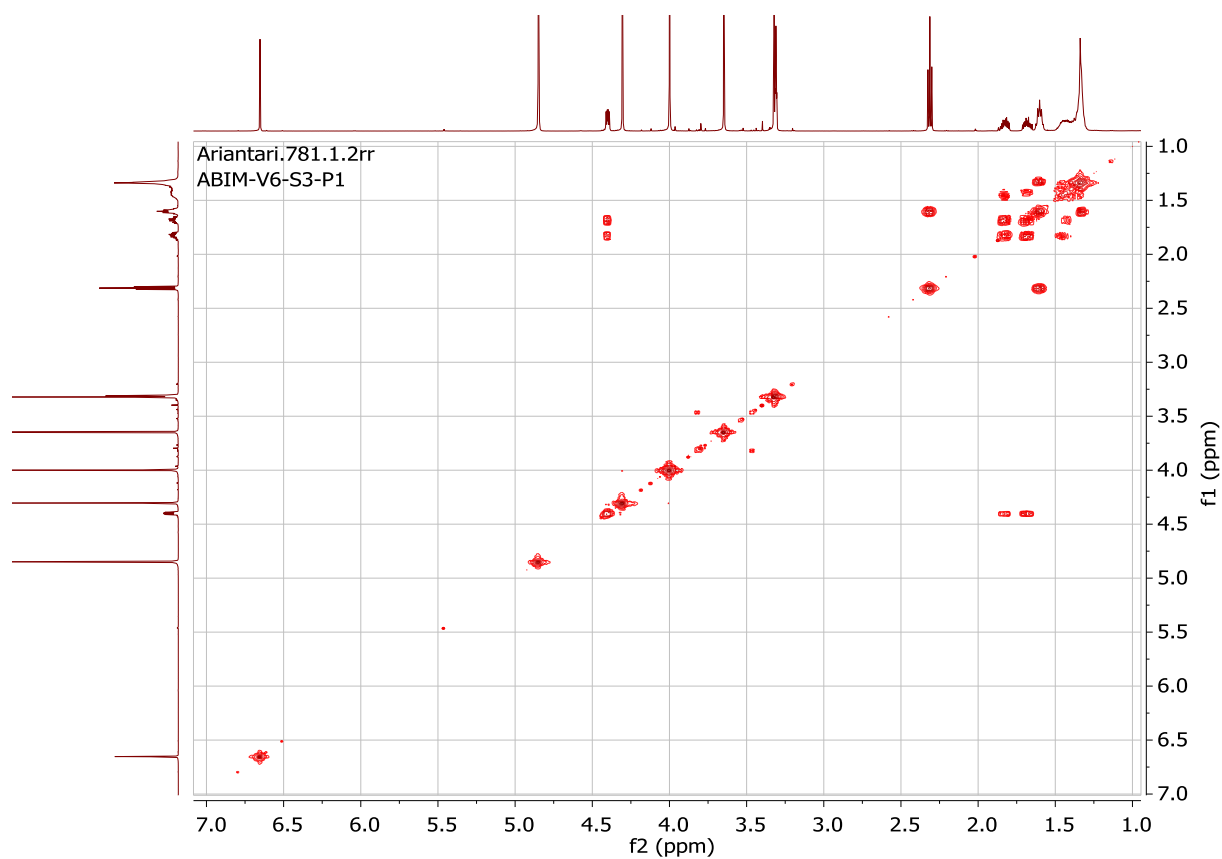

**Figure S70.**  $^1\text{H}$ - $^1\text{H}$  COSY (600 MHz,  $\text{MeOH-}d_4$ ) spectrum of compound **10**.

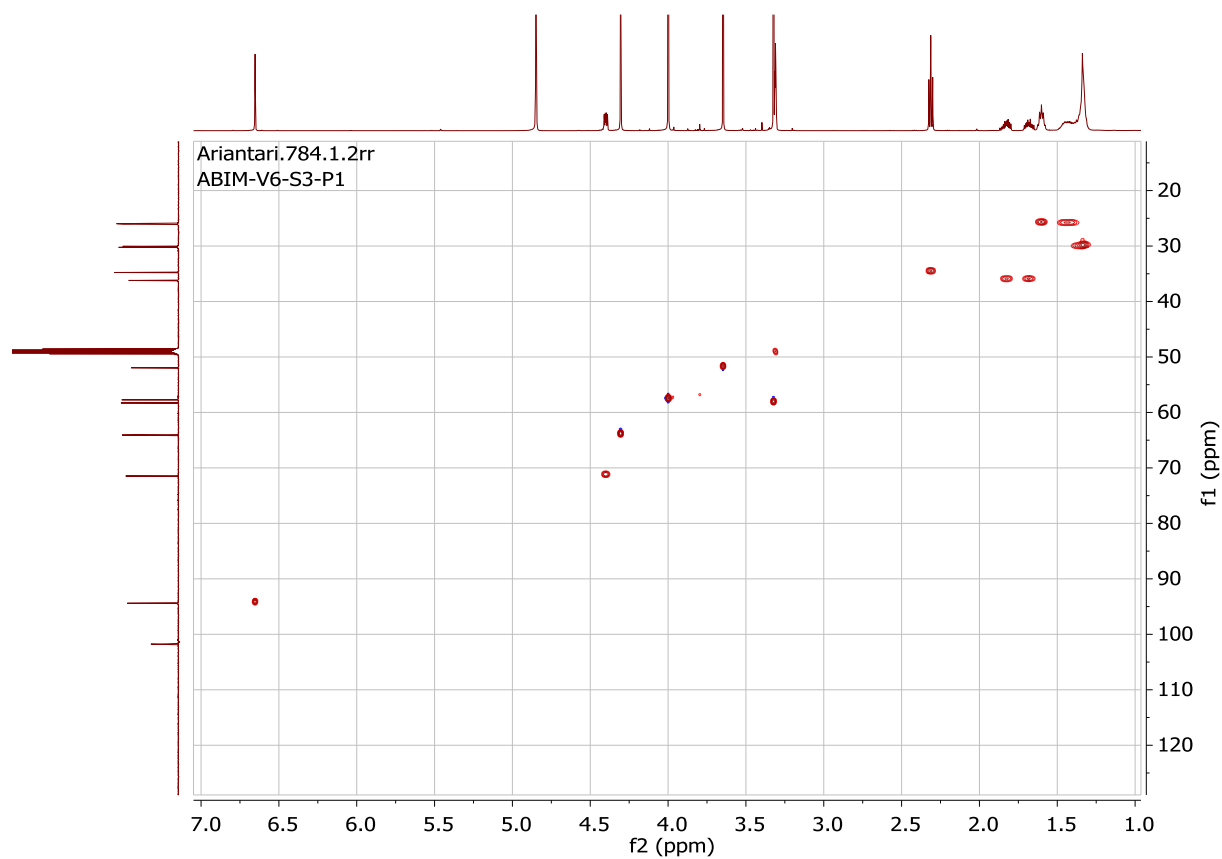

**Figure S71.** HSQC (600 and 150 MHz,  $\text{MeOH-}d_4$ ) spectrum of compound **10**.



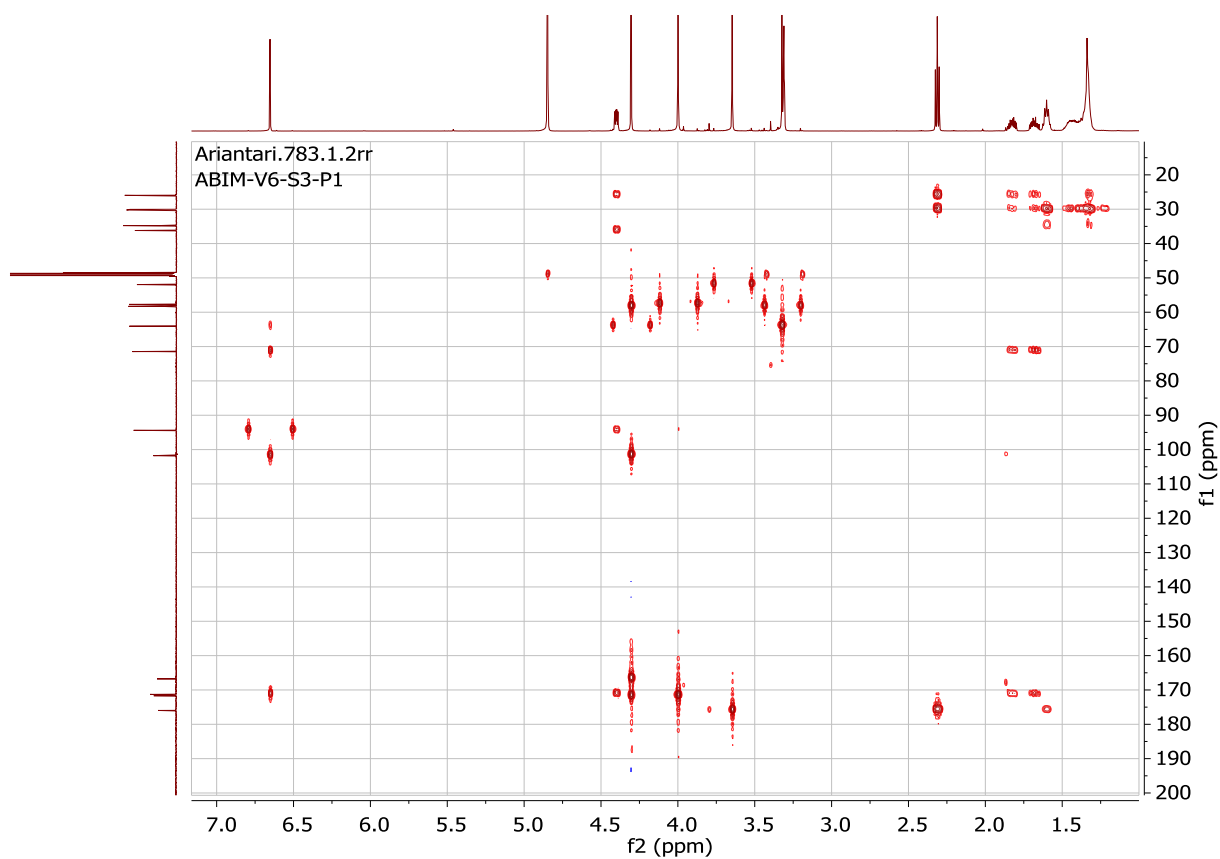

**Figure S72.** HMBC (600 and 150 MHz, MeOH- $d_4$ ) spectrum of compound **10**.

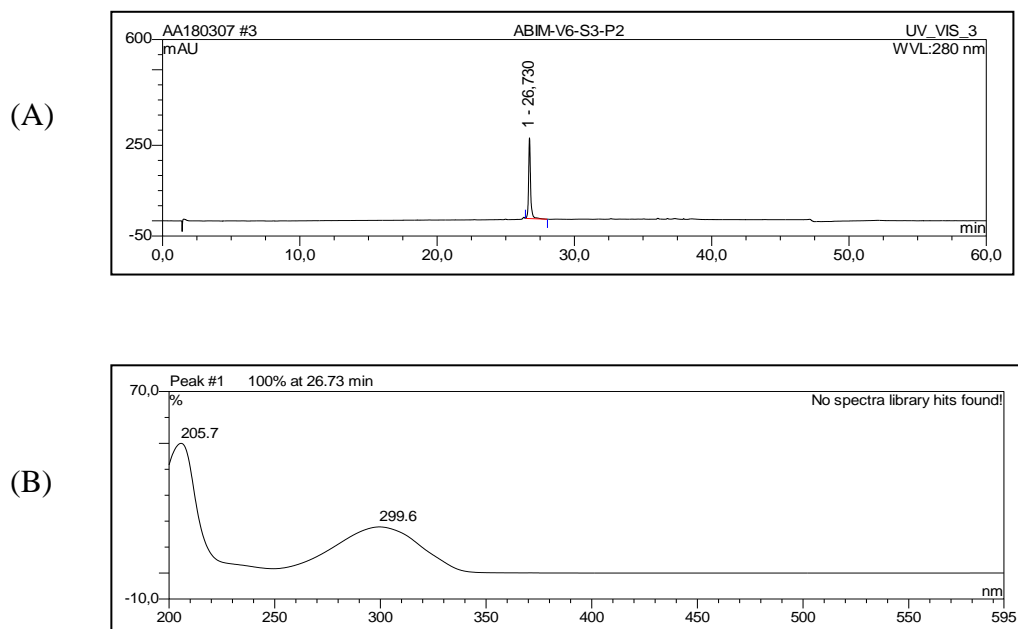

**Figure S73.** HPLC chromatogram (A) and UV spectrum (B) of compound **11**.

**Acquisition Parameter**

|             |            |                       |           |                  |           |
|-------------|------------|-----------------------|-----------|------------------|-----------|
| Source Type | ESI        | Ion Polarity          | Positive  | Set Nebulizer    | 0.3 Bar   |
| Focus       | Not active | Set Capillary         | 4000 V    | Set Dry Heater   | 180 °C    |
| Scan Begin  | 50 m/z     | Set End Plate Offset  | -500 V    | Set Dry Gas      | 4.0 l/min |
| Scan End    | 1500 m/z   | Set Collision Cell RF | 600.0 Vpp | Set Divert Valve | Source    |

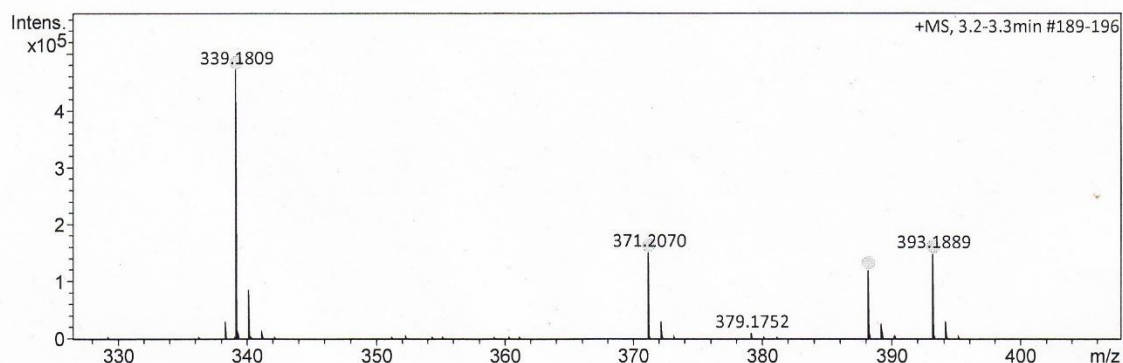

| Meas. m/z | # | Ion Formula  | m/z      | err [ppm] | mSigma | # mSigma | Score  | rdb  | e <sup>-</sup> Conf | N-Rule |
|-----------|---|--------------|----------|-----------|--------|----------|--------|------|---------------------|--------|
| 339.1809  | 1 | C18H27O6     | 339.1802 | -2.0      | 11.6   | 1        | 100.00 | 5.5  | even                | ok     |
|           | 2 | C19H23N4O2   | 339.1816 | 2.0       | 25.1   | 2        | 75.40  | 10.5 | even                | ok     |
| 371.2070  | 1 | C19H31O7     | 371.2064 | -1.4      | 4.6    | 1        | 100.00 | 4.5  | even                | ok     |
| 388.2334  | 1 | C19H34NO7    | 388.2330 | -1.1      | 1.9    | 1        | 100.00 | 3.5  | even                | ok     |
| 393.1889  | 1 | C19H30NaO7   | 393.1884 | -1.3      | 2.0    | 1        | 100.00 | 4.5  | even                | ok     |
|           | 2 | C20H26N4NaO3 | 393.1897 | 2.1       | 15.2   | 2        | 67.19  | 9.5  | even                | ok     |

**Figure S74.** HRESIMS spectrum of compound **11**.

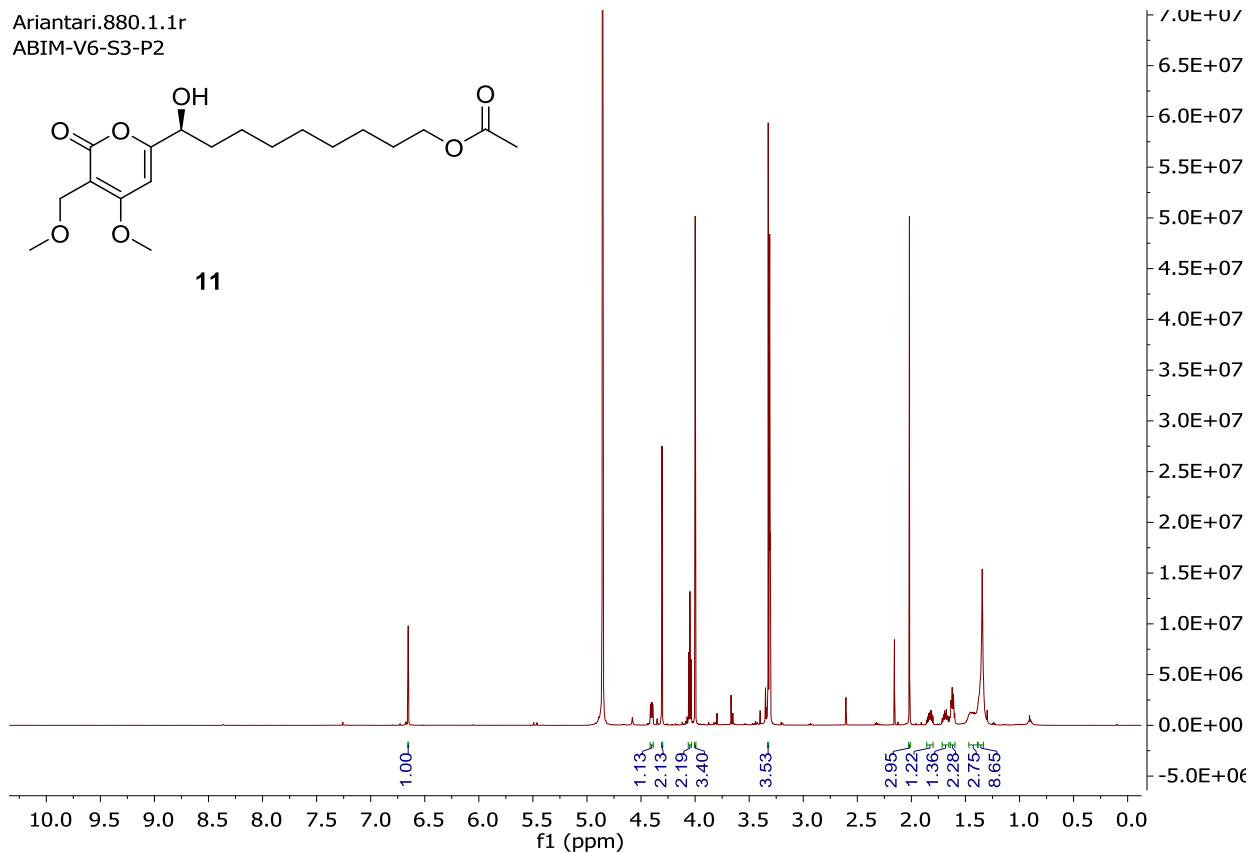

**Figure S75.** <sup>1</sup>H NMR (600 MHz, MeOH-*d*<sub>4</sub>) spectrum of compound **11**.

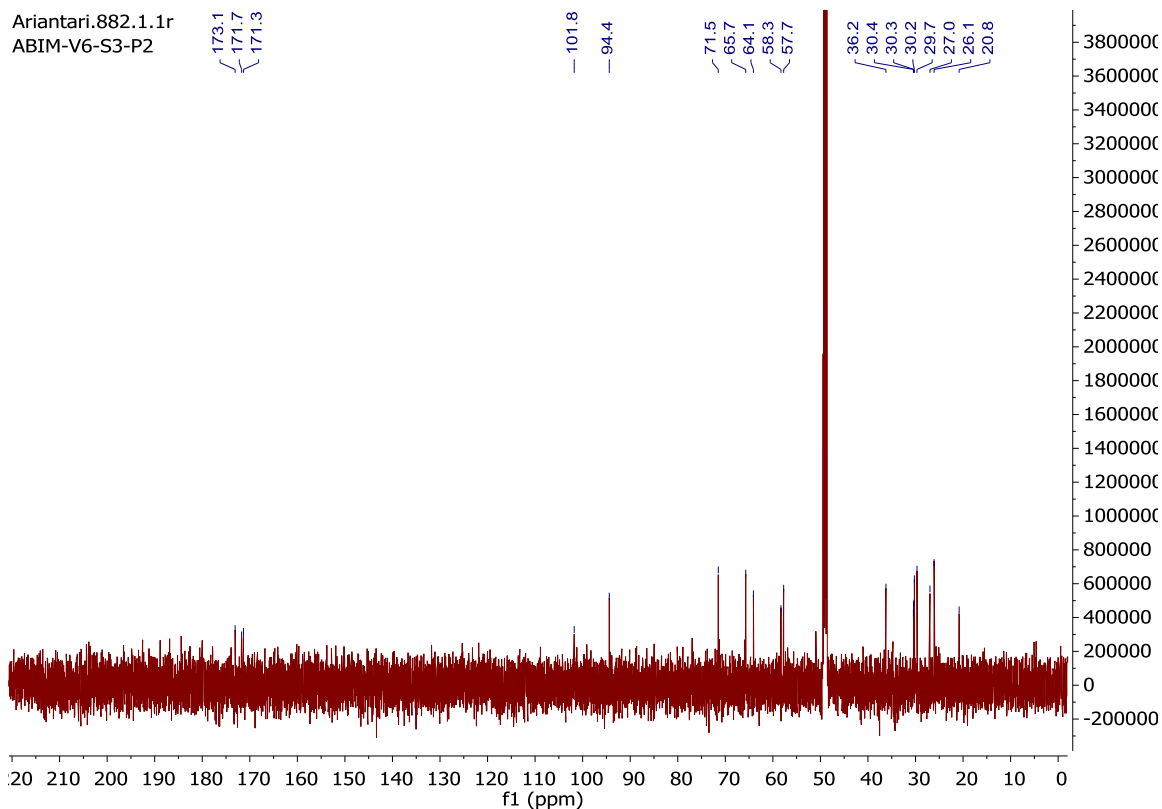

**Figure S76.**  $^{13}\text{C}$  NMR (150 MHz,  $\text{MeOH-}d_4$ ) spectrum of compound **11**.  
Note:  $\delta_{\text{C}}$  166.7 was hidden in the baseline, but could be extracted from the HMBC spectrum.

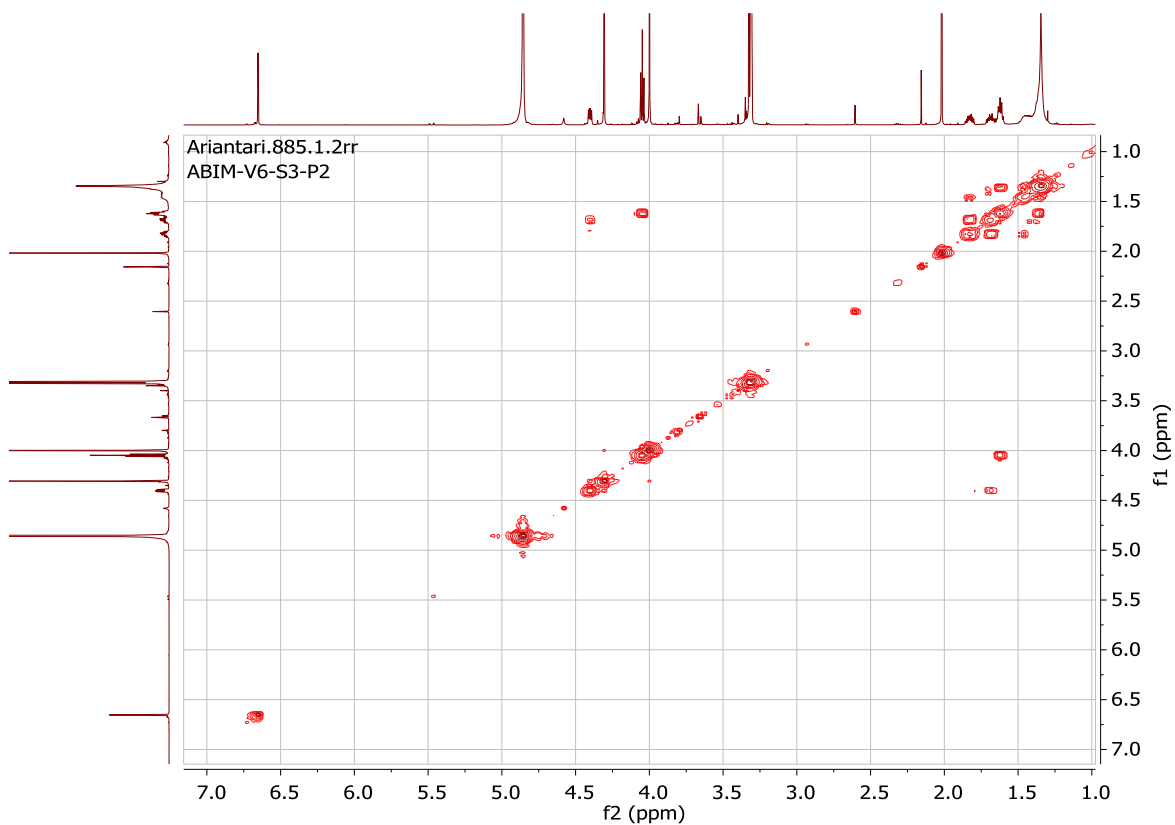

**Figure S77.**  $^1\text{H-}^1\text{H}$  COSY (600 MHz,  $\text{MeOH-}d_4$ ) spectrum of compound **11**.

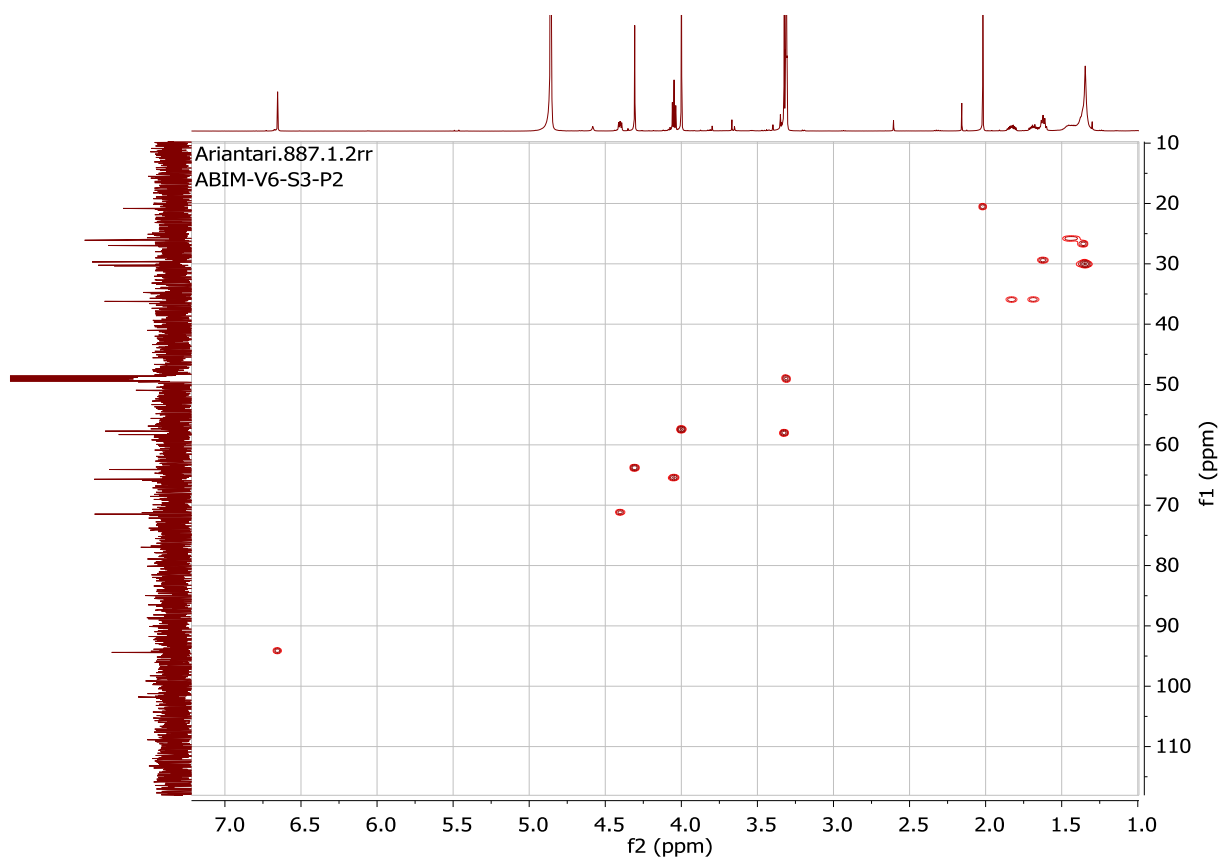

**Figure S78.** HSQC (600 and 150 MHz, MeOH- $d_4$ ) spectrum of compound **11**.

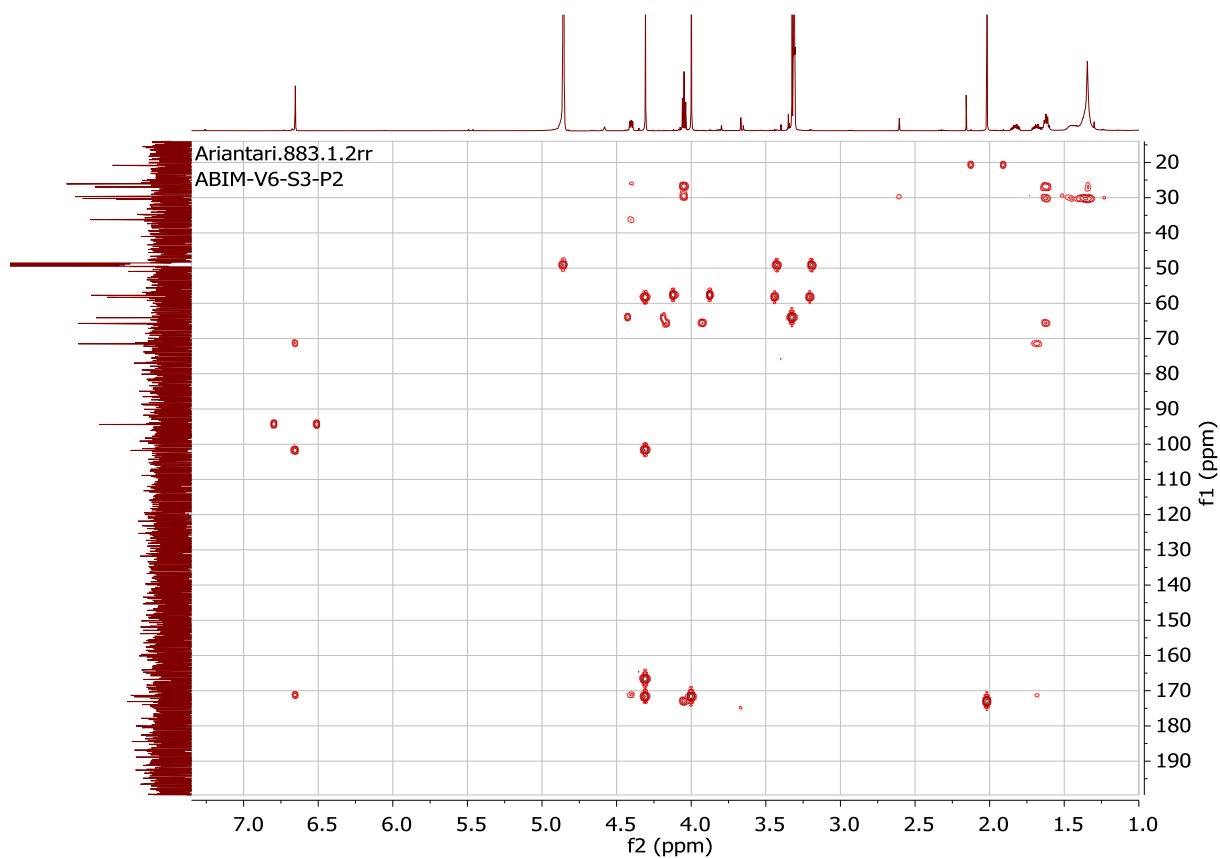

**Figure S79.** HMBC (600 and 150 MHz, MeOH- $d_4$ ) spectrum of compound **11**.

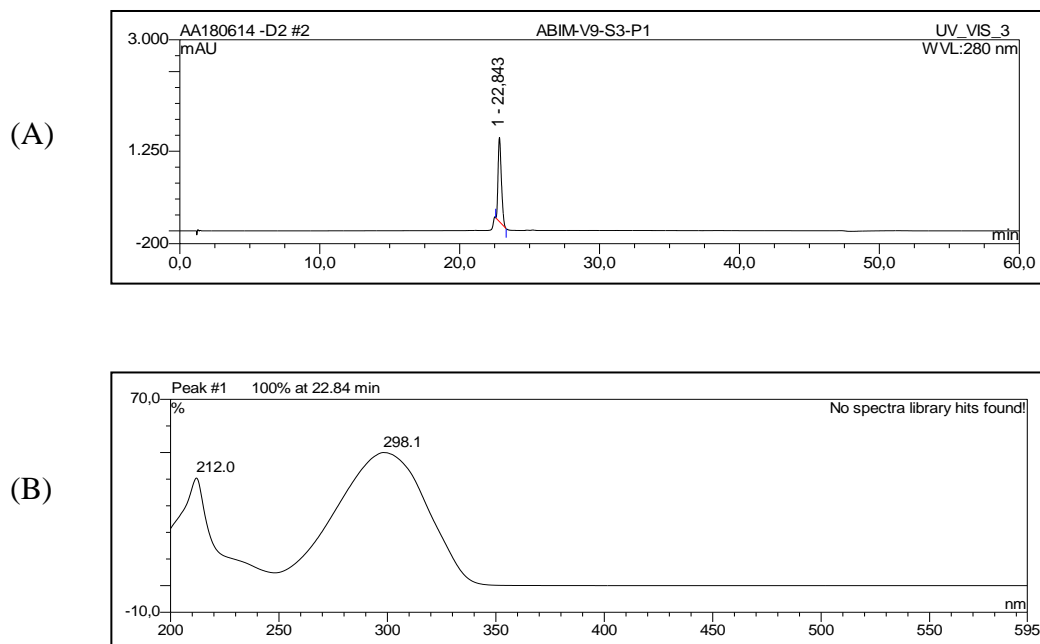

**Figure S80.** HPLC chromatogram (A) and UV spectrum (B) of compound **12**.

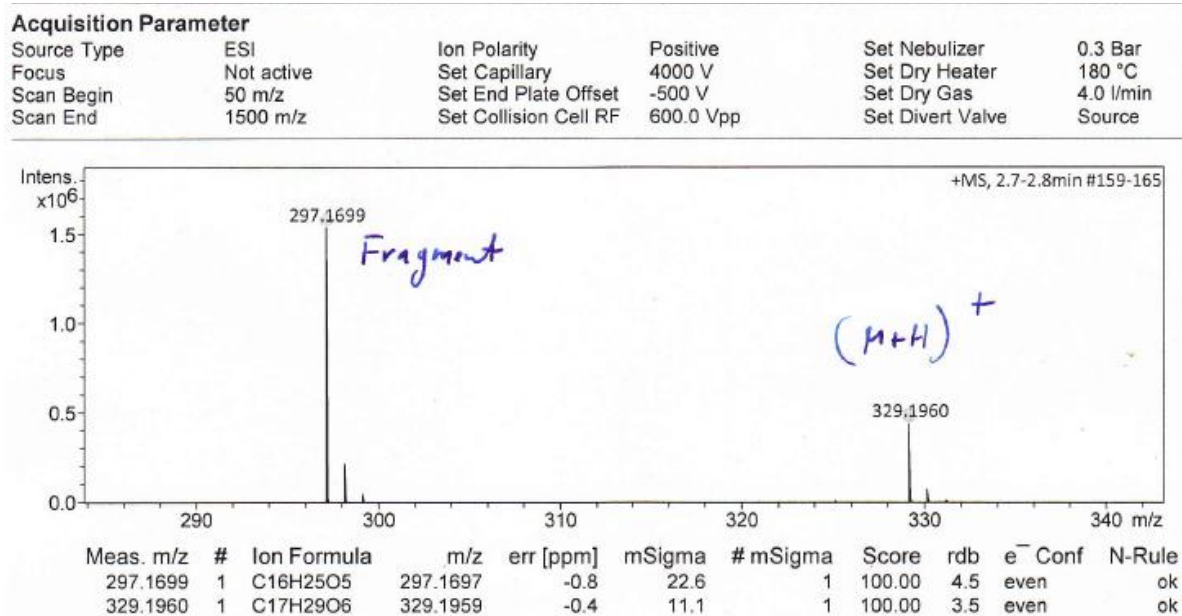

**Figure S81.** HRESIMS spectrum of compound **12**.

Ariantari.900.1.1r  
ABIM-V9-S3-P1

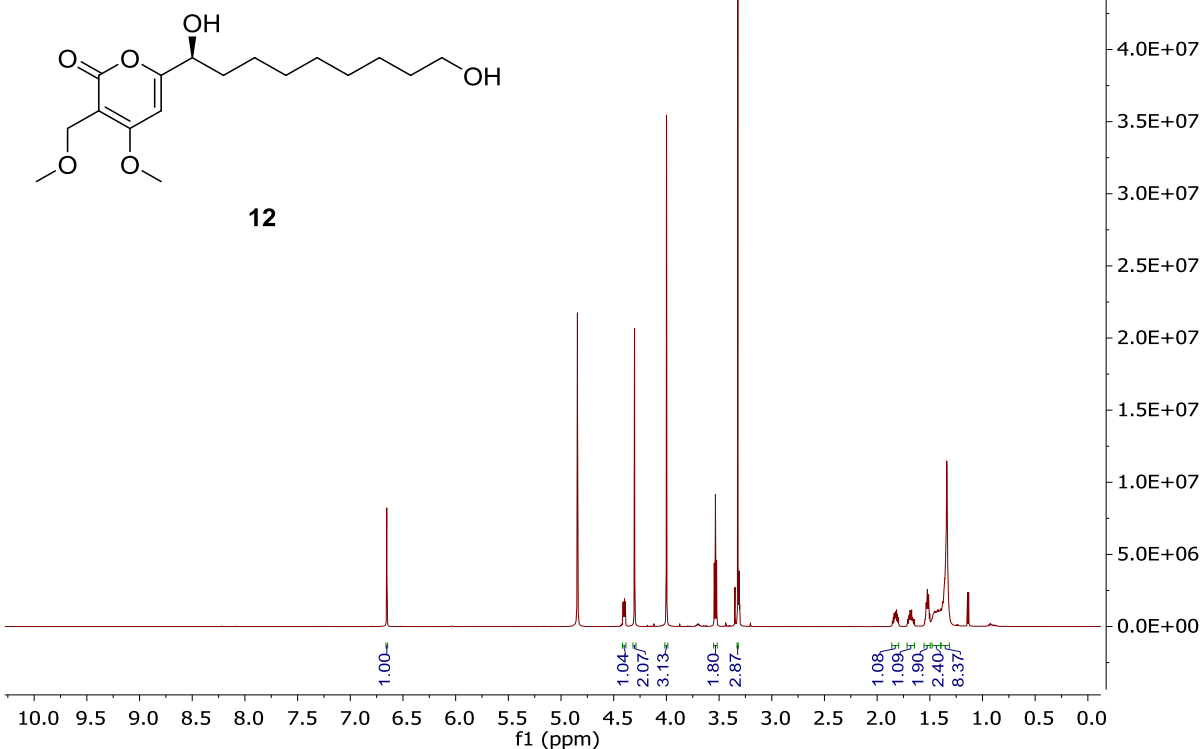

**Figure S82.**  $^1\text{H}$  NMR (600 MHz,  $\text{MeOH-}d_4$ ) spectrum of compound **12**.

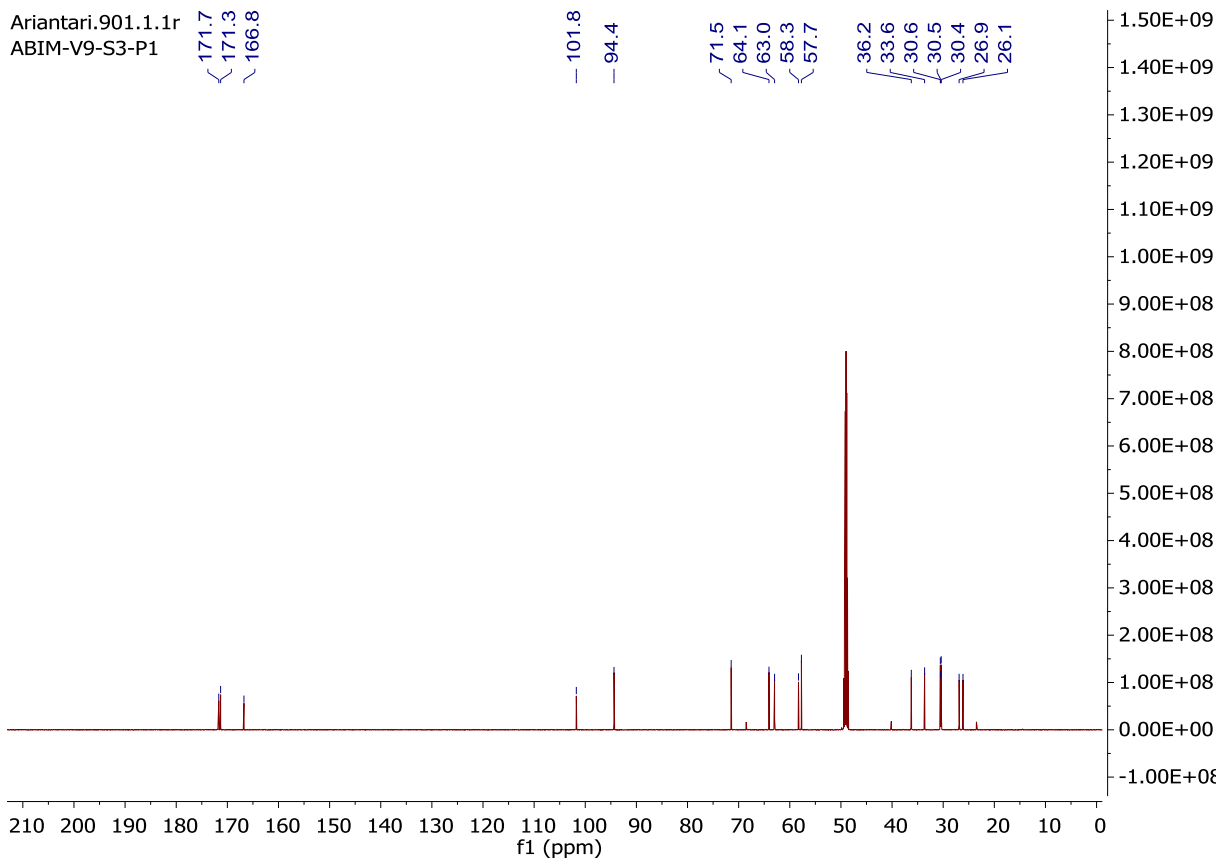

**Figure S83.**  $^{13}\text{C}$  NMR (150 MHz,  $\text{MeOH-}d_4$ ) spectrum of compound **12**.

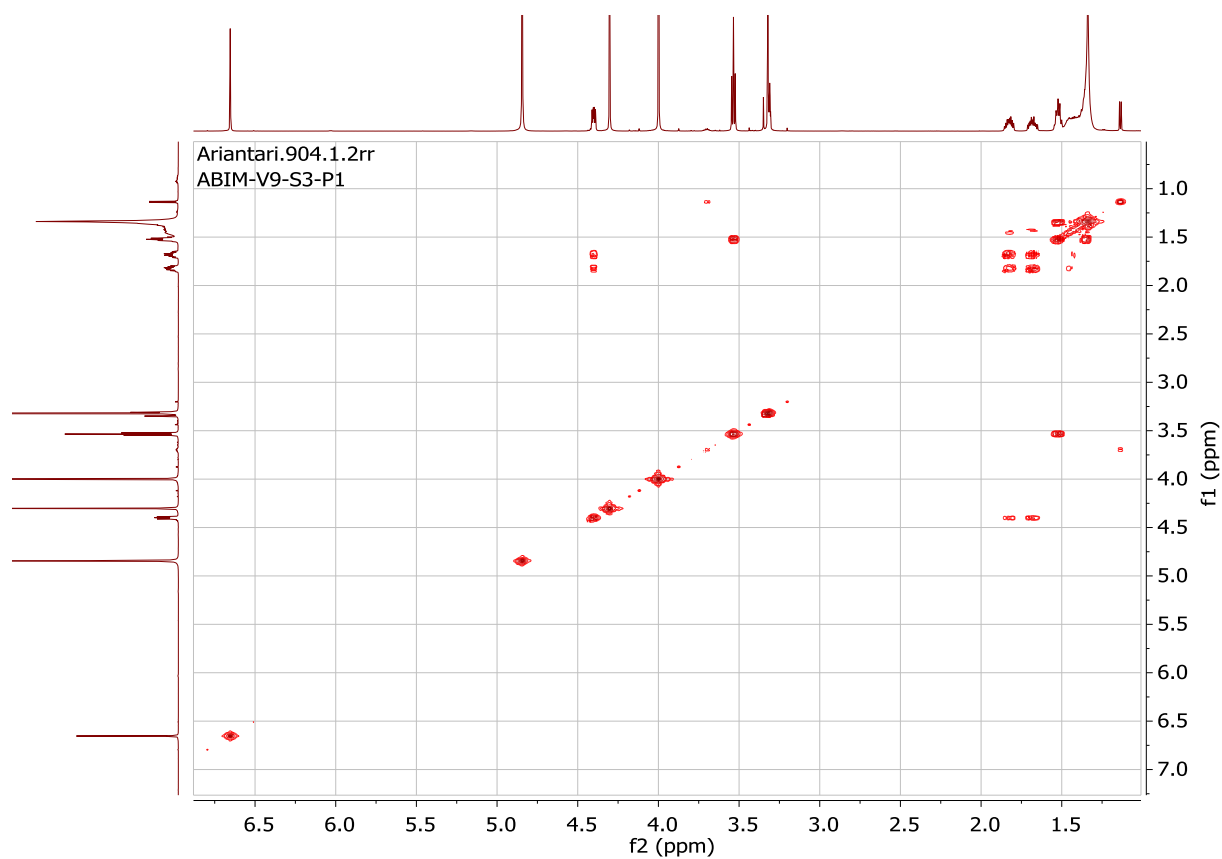

**Figure S84.**  $^1\text{H}$ - $^1\text{H}$  COSY (600 MHz,  $\text{MeOH-}d_4$ ) spectrum of compound **12**.

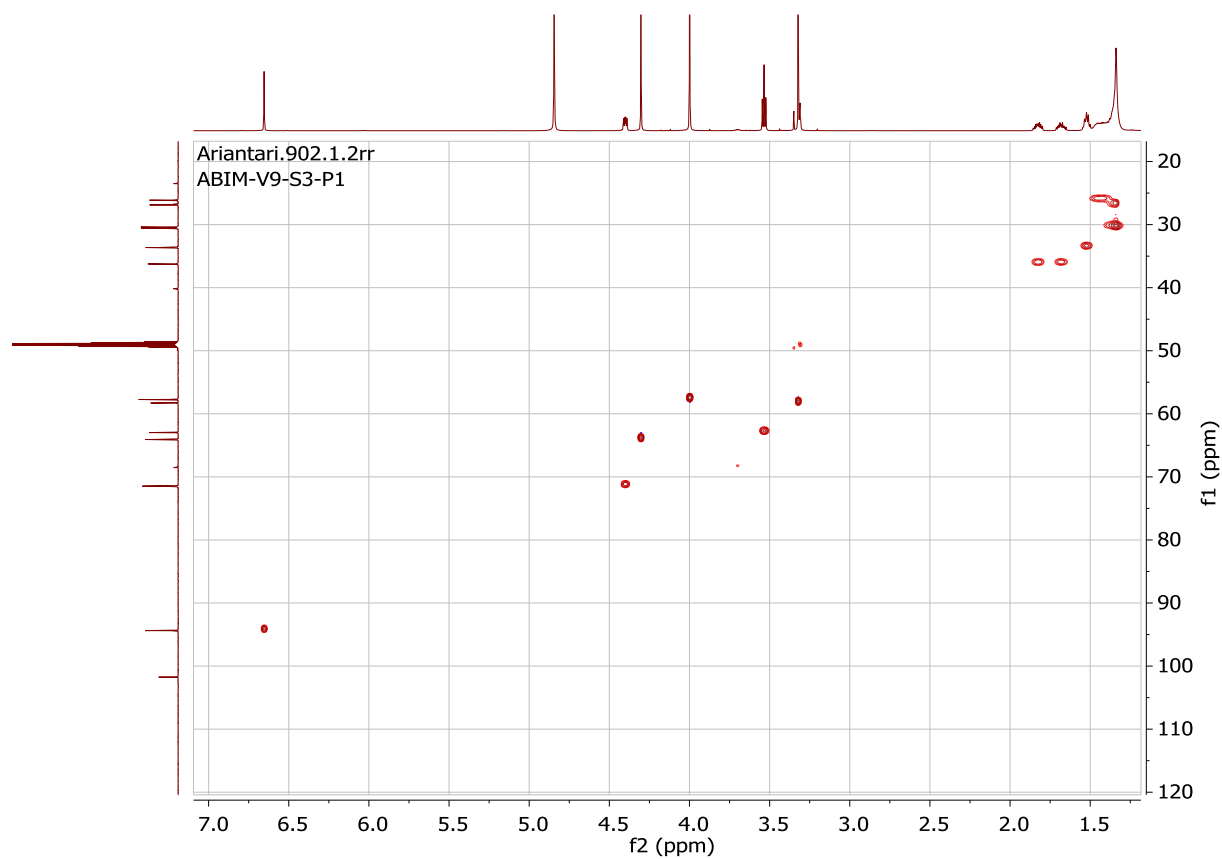

**Figure S85.** HSQC (600 and 150 MHz,  $\text{MeOH-}d_4$ ) spectrum of compound **12**.

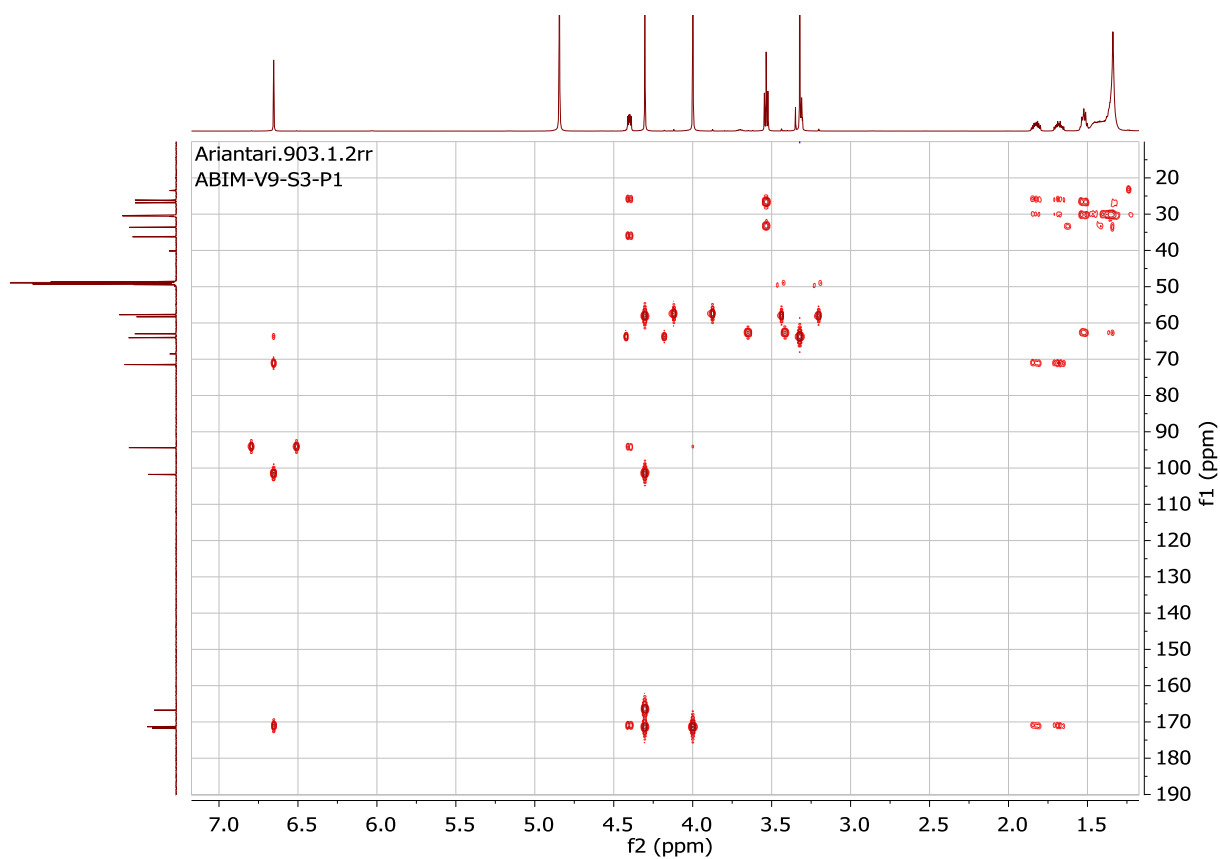

**Figure S86.** HMBC (600 and 150 MHz, MeOH- $d_4$ ) spectrum of compound **12**.

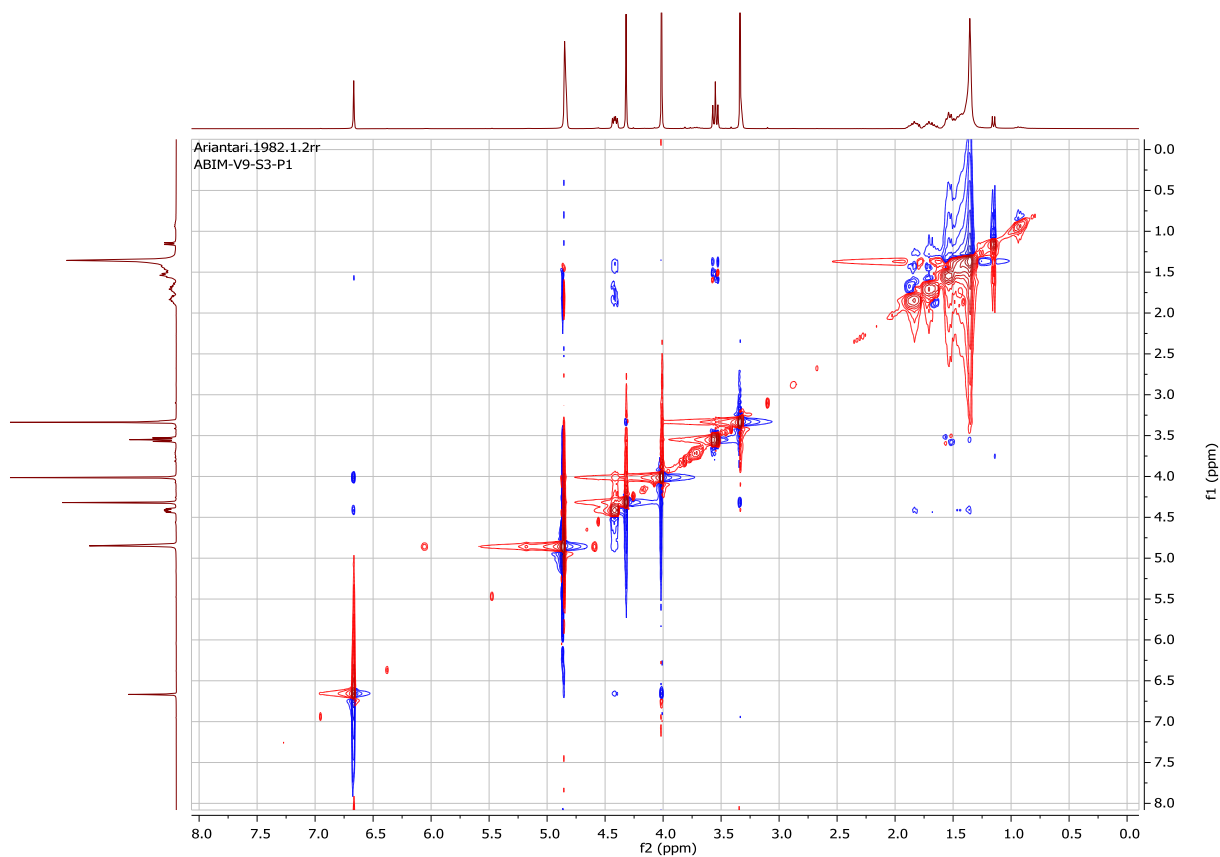

**Figure S87.** NOESY (300 MHz, MeOH- $d_4$ ) spectrum of compound **12**.



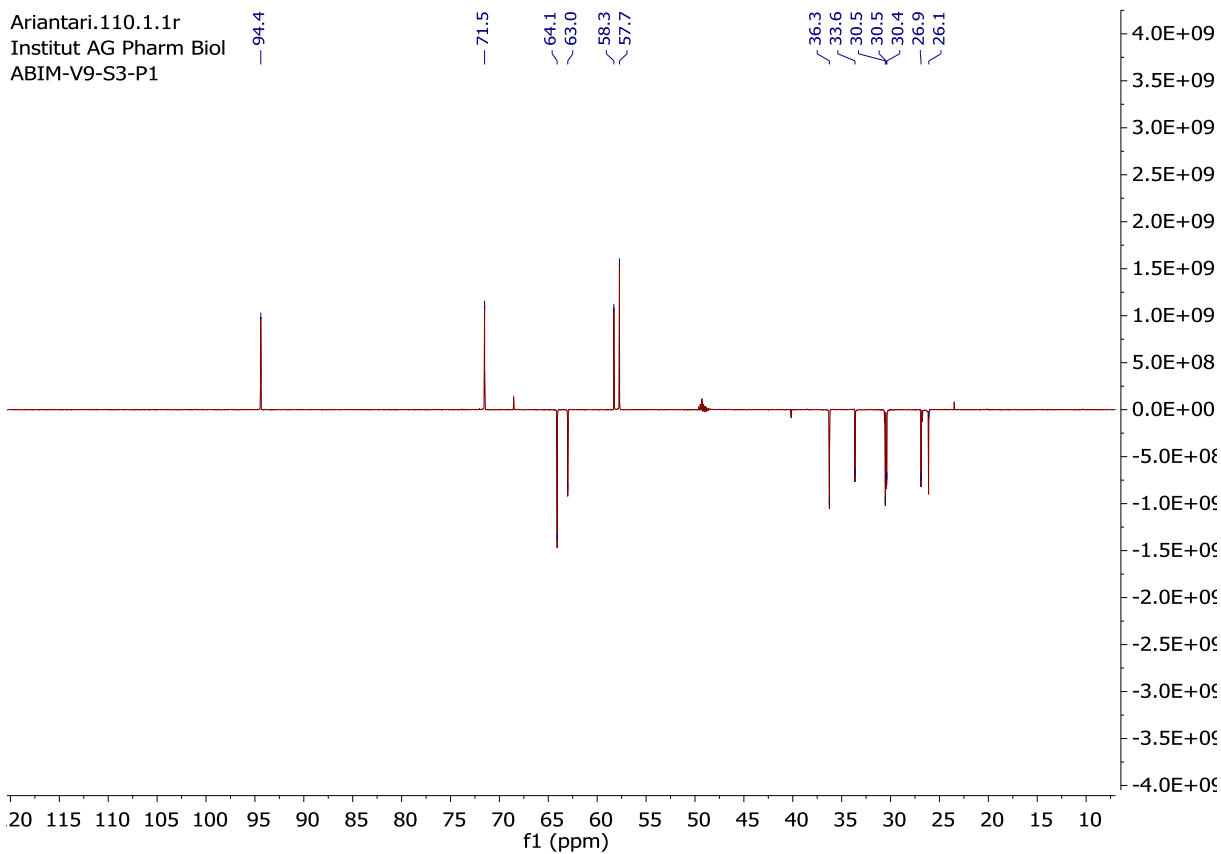

**Figure S88.** DEPT 135 (125 MHz, MeOH-*d*<sub>4</sub>) spectrum of compound **12**.

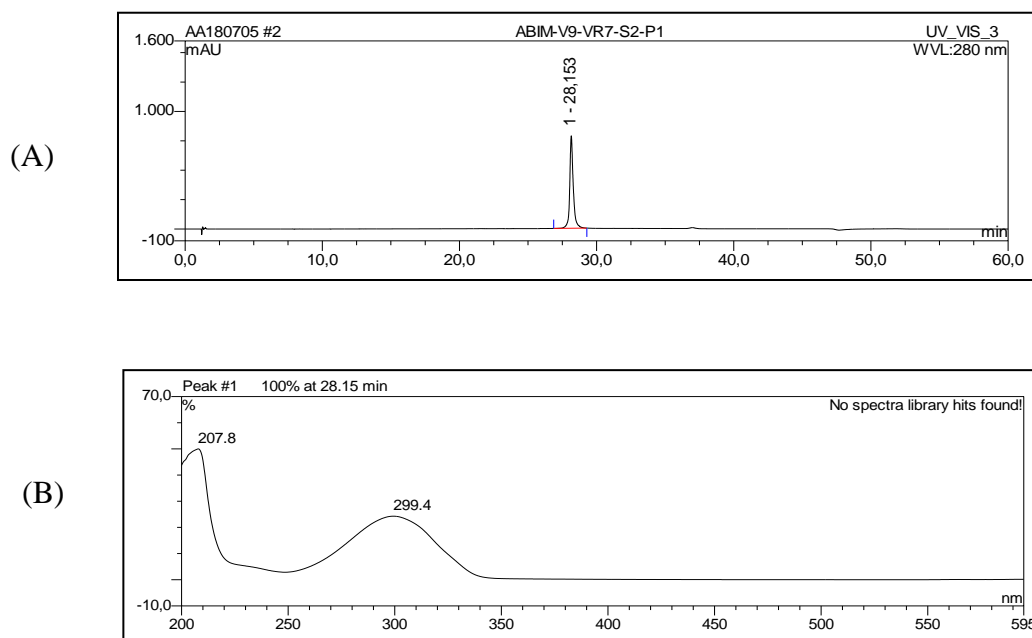

**Figure S89.** HPLC chromatogram (A) and UV spectrum (B) of compound **13**.

| Acquisition Parameter |            | Ion Polarity          | Positive  | Set Nebulizer    | 0.3 Bar   |
|-----------------------|------------|-----------------------|-----------|------------------|-----------|
| Source Type           | ESI        | Set Capillary         | 4000 V    | Set Dry Heater   | 180 °C    |
| Focus                 | Not active | Set End Plate Offset  | -500 V    | Set Dry Gas      | 4.0 l/min |
| Scan Begin            | 50 m/z     | Set Collision Cell RF | 600.0 Vpp | Set Divert Valve | Source    |
| Scan End              | 1500 m/z   |                       |           |                  |           |

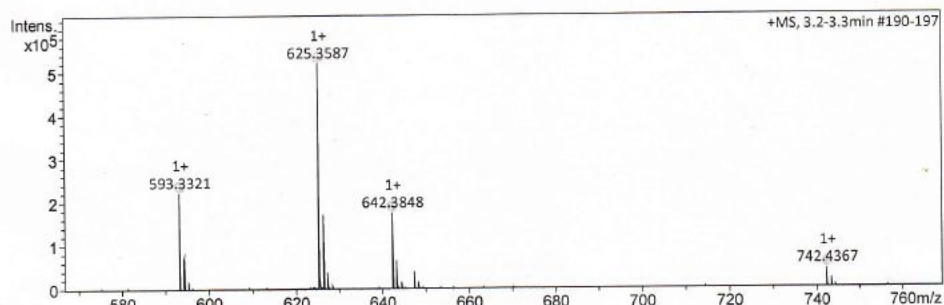

| Meas. m/z | # | Ion Formula | m/z      | err [ppm] | mSigma | # mSigma | Score  | rdb  | e <sup>-</sup> Conf | N-Rule |
|-----------|---|-------------|----------|-----------|--------|----------|--------|------|---------------------|--------|
| 297.1696  | 1 | C16H25O5    | 297.1697 | 0.2       | 3.9    | 1        | 100.00 | 4.5  | even                | ok     |
| 329.1958  | 1 | C17H29O6    | 329.1959 | 0.3       | 17.1   | 1        | 100.00 | 3.5  | even                | ok     |
| 371.3155  | 1 | C22H43O4    | 371.3156 | 0.2       | 21.4   | 1        | 100.00 | 1.5  | even                | ok     |
| 388.3418  | 1 | C22H46NO4   | 388.3421 | 0.9       | 23.2   | 1        | 100.00 | 0.5  | even                | ok     |
| 419.3154  | 1 | C20H43O4    | 419.3156 | 0.6       | 2.6    | 1        | 100.00 | 5.5  | even                | ok     |
| 593.3321  | 1 | C32H49O10   | 593.3320 | -0.2      | 7.0    | 1        | 100.00 | 8.5  | even                | ok     |
|           | 2 | C33H45N4O6  | 593.3334 | 2.1       | 18.7   | 2        | 44.83  | 13.5 | even                | ok     |
|           | 3 | C30H37N14   | 593.3320 | -0.2      | 20.3   | 3        | 76.73  | 19.5 | even                | ok     |
| 625.3587  | 1 | C33H53O11   | 625.3582 | -0.7      | 19.9   | 1        | 100.00 | 7.5  | even                | ok     |
|           | 2 | C31H41N14O  | 625.3582 | -0.7      | 31.0   | 2        | 77.04  | 18.5 | even                | ok     |
|           | 3 | C34H49N4O7  | 625.3596 | 1.5       | 31.3   | 3        | 59.82  | 12.5 | even                | ok     |
|           | 4 | C46H45N2    | 625.3577 | -1.5      | 93.9   | 4        | 6.71   | 25.5 | even                | ok     |
| 642.3848  | 1 | C33H56NO11  | 642.3848 | -0.1      | 3.6    | 1        | 100.00 | 6.5  | even                | ok     |
|           | 2 | C34H52N5O7  | 642.3861 | 2.0       | 8.9    | 2        | 47.50  | 11.5 | even                | ok     |
|           | 3 | C31H44N15O  | 642.3848 | -0.1      | 12.2   | 3        | 85.16  | 17.5 | even                | ok     |
|           | 4 | C46H48N3    | 642.3843 | -0.9      | 70.8   | 4        | 13.24  | 24.5 | even                | ok     |
| 742.4367  | 1 | C36H52N15O3 | 742.4372 | 0.7       | 10.0   | 1        | 100.00 | 18.5 | even                | ok     |
|           | 2 | C38H64NO13  | 742.4372 | 0.7       | 14.2   | 2        | 91.91  | 7.5  | even                | ok     |
|           | 3 | C35H56N11O7 | 742.4359 | -1.1      | 16.8   | 3        | 77.02  | 13.5 | even                | ok     |
|           | 4 | C51H56N3O2  | 742.4367 | 0.1       | 61.3   | 4        | 32.79  | 25.5 | even                | ok     |

Figure S90. HRESIMS spectrum of compound 13.

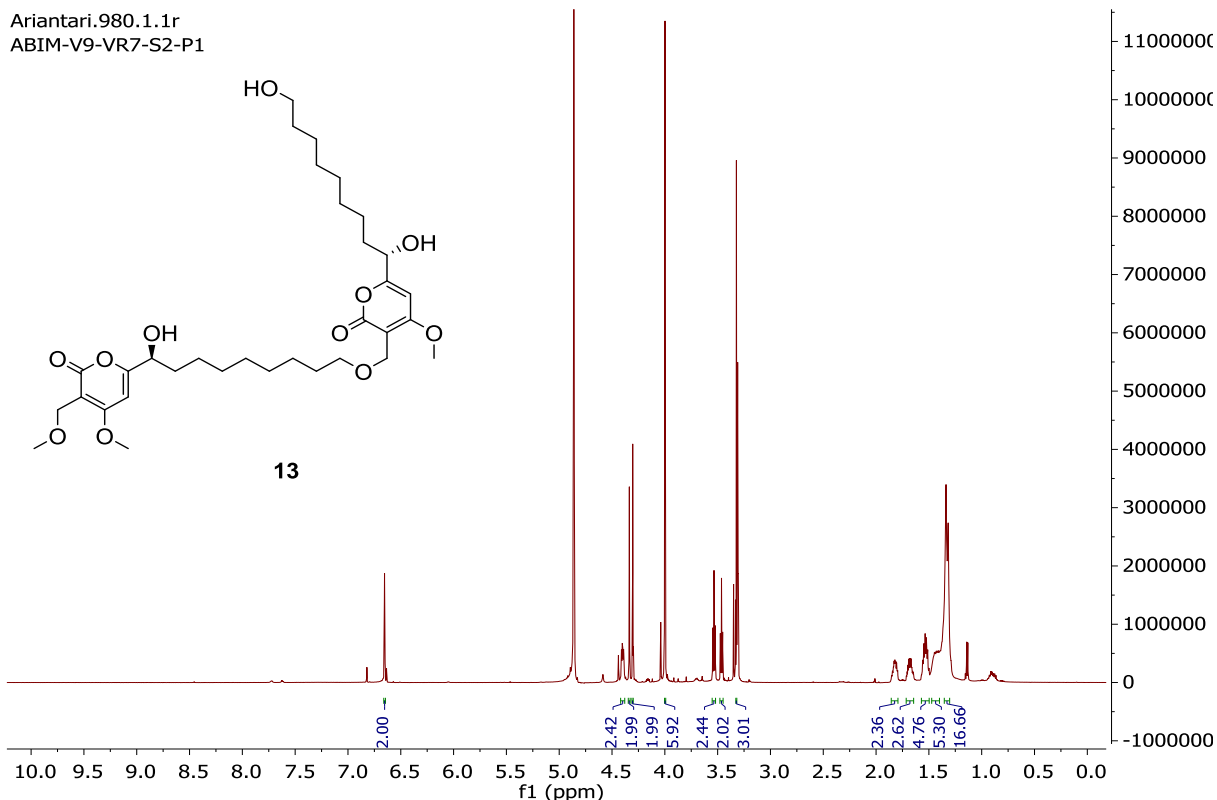

Figure S91. <sup>1</sup>H NMR (600 MHz, MeOH-*d*<sub>4</sub>) spectrum of compound 13.

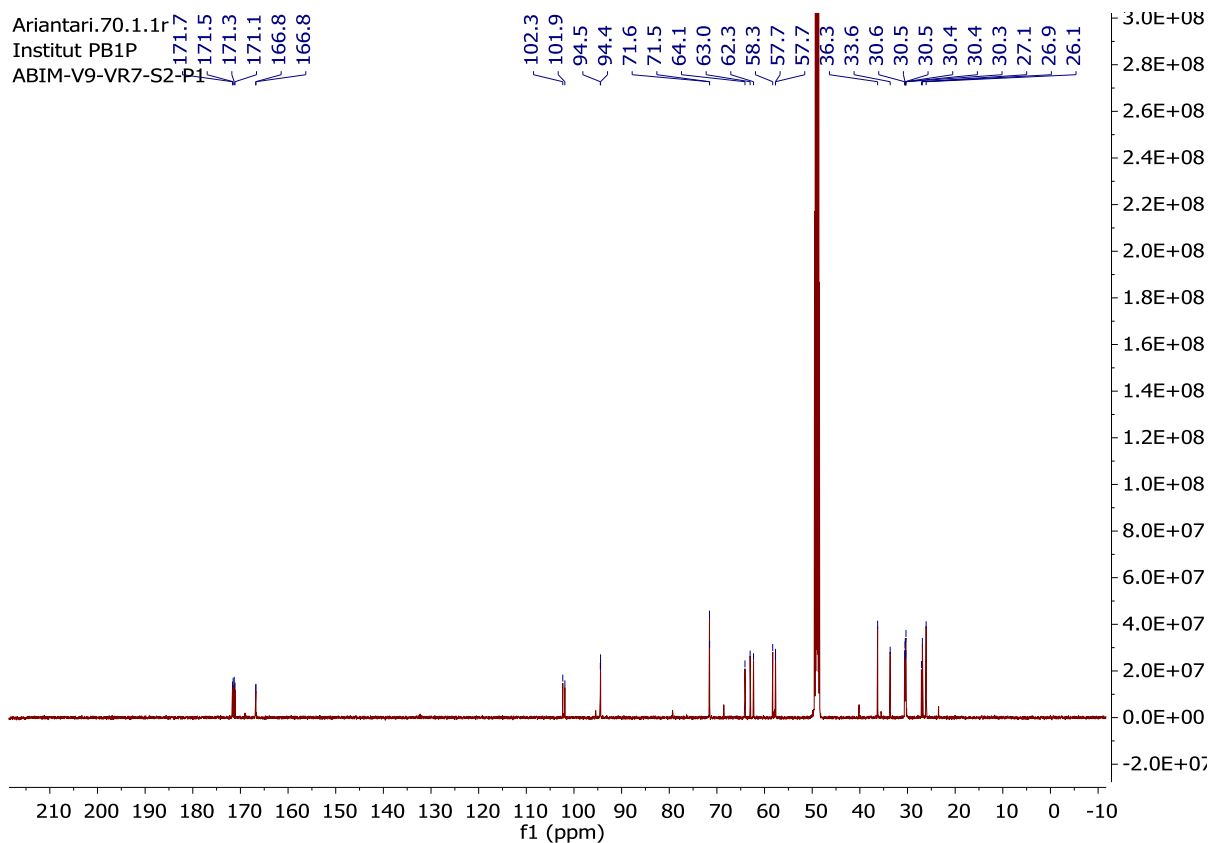

**Figure S92.**  $^{13}\text{C}$  NMR (125 MHz,  $\text{MeOH-}d_4$ ) spectrum of compound **13**.

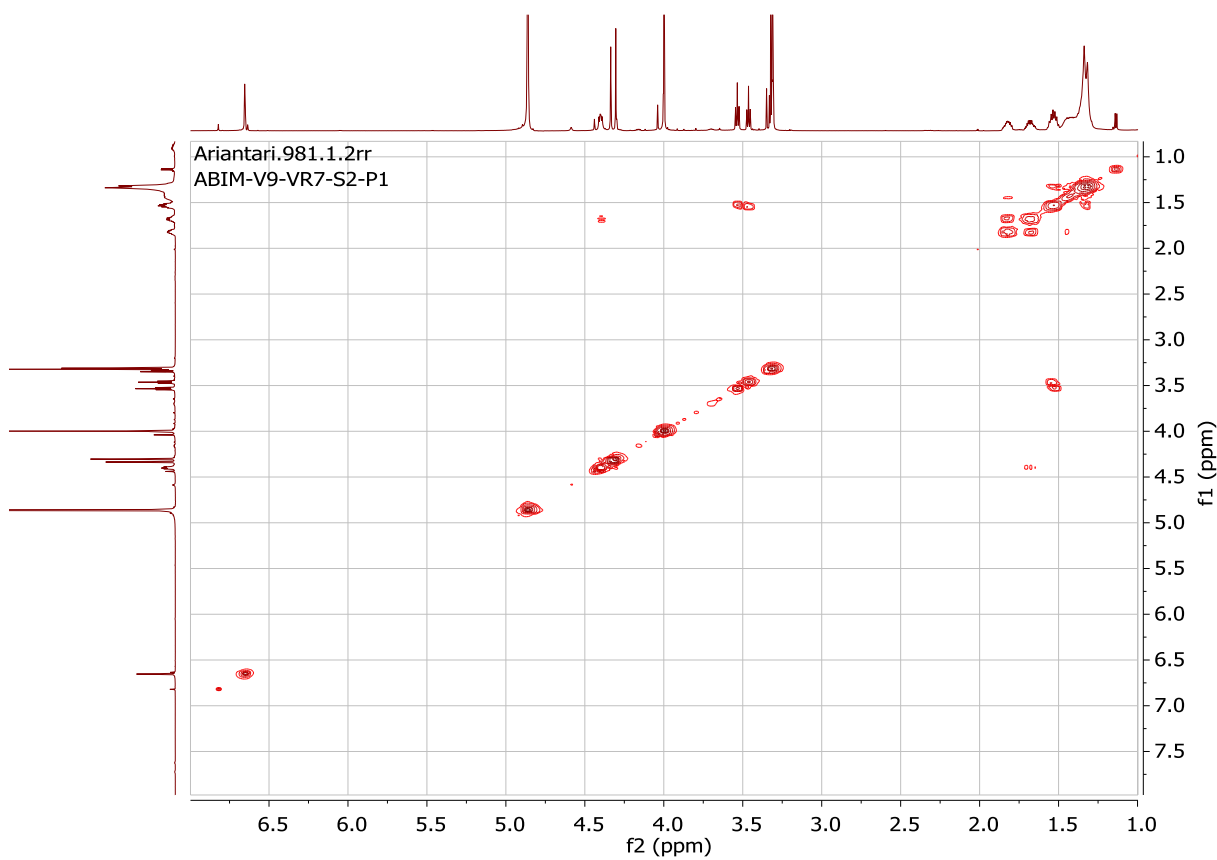

**Figure S93.**  $^1\text{H-}^1\text{H}$  COSY (600 MHz,  $\text{MeOH-}d_4$ ) spectrum of compound **13**.

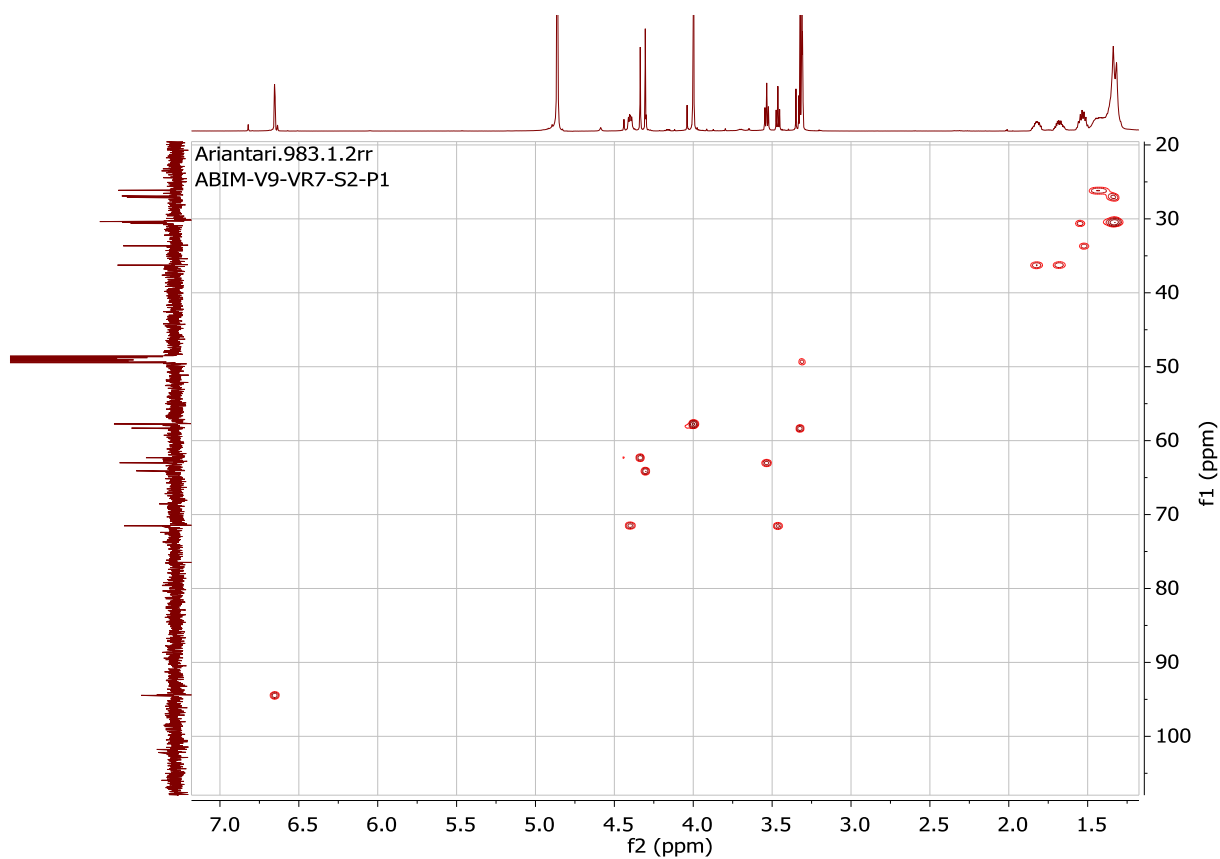

Figure S94. HSQC (600 and 150 MHz, MeOH-*d*<sub>4</sub>) spectrum of compound **13**.

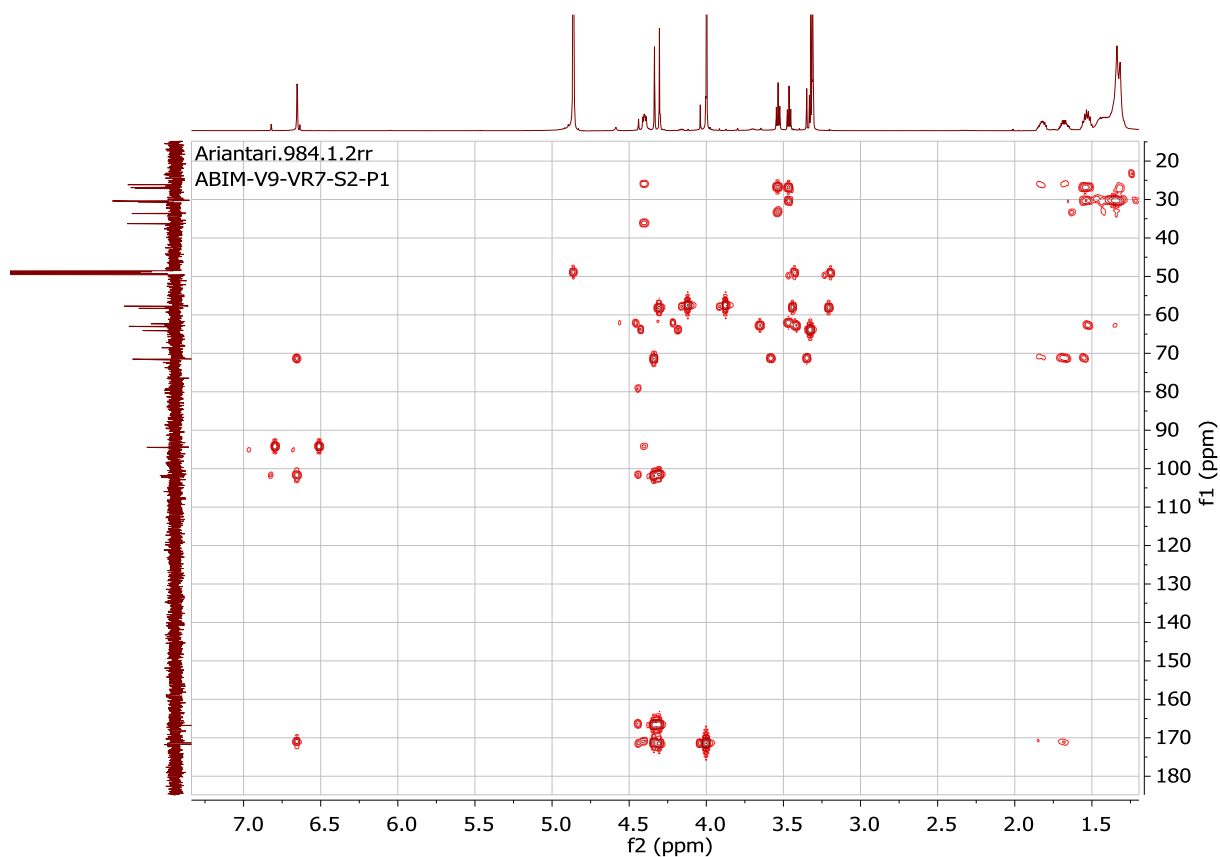

Figure S95. HMBC (600 and 150 MHz, MeOH-*d*<sub>4</sub>) spectrum of compound **13**.

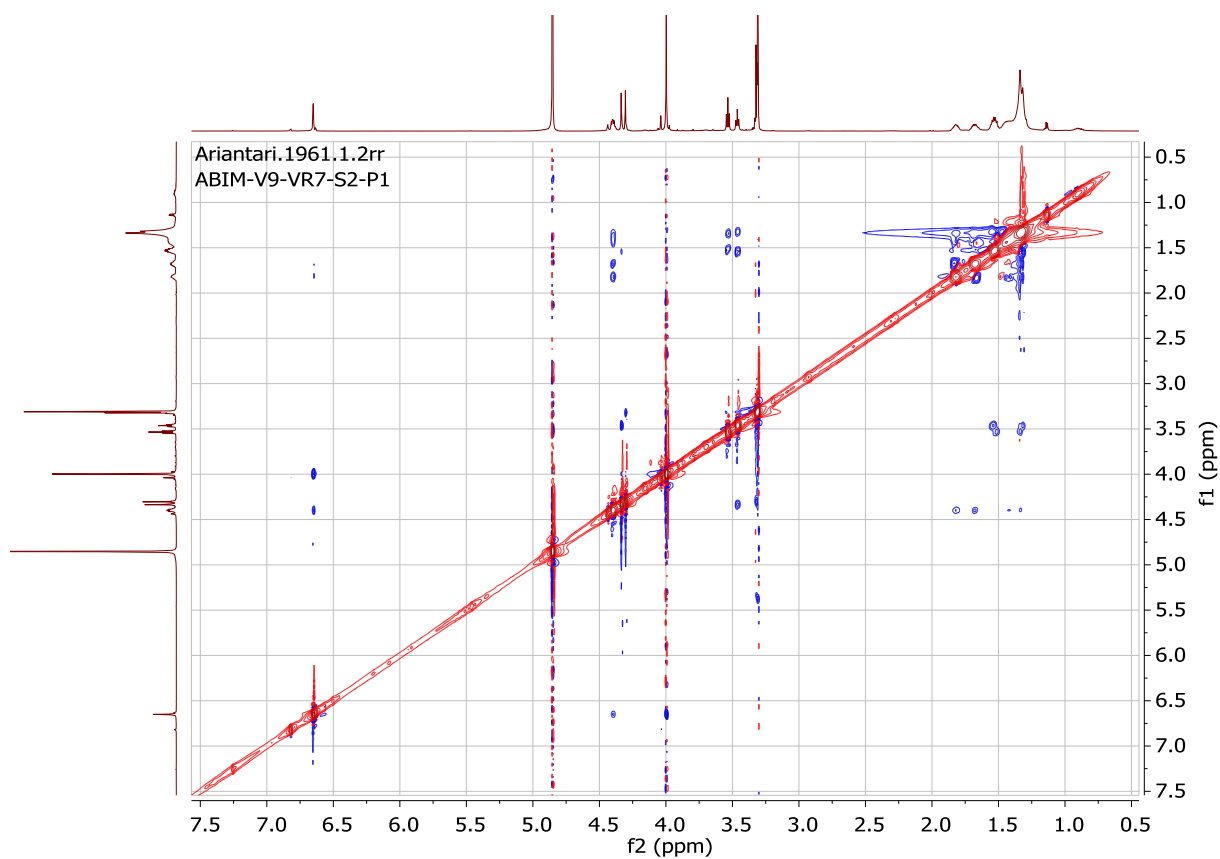

**Figure S96.** NOESY (600 MHz, MeOH- $d_4$ ) spectrum of compound **13**.

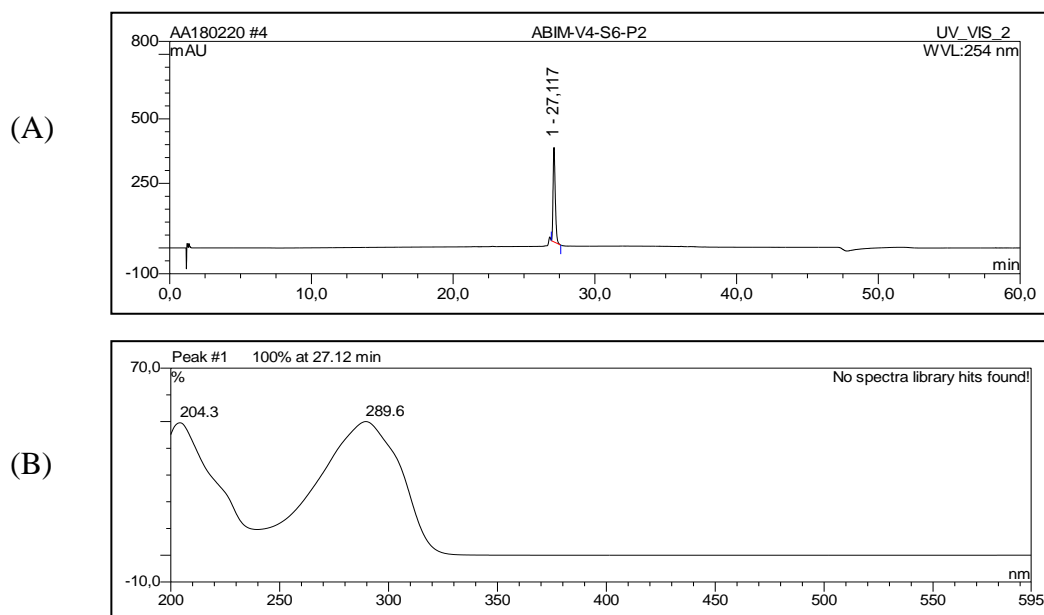

**Figure S97.** HPLC chromatogram (A) and UV spectrum (B) of compound **16**.

**Acquisition Parameter**

|             |            |                       |           |                  |           |
|-------------|------------|-----------------------|-----------|------------------|-----------|
| Source Type | ESI        | Ion Polarity          | Positive  | Set Nebulizer    | 0.3 Bar   |
| Focus       | Not active | Set Capillary         | 4000 V    | Set Dry Heater   | 180 °C    |
| Scan Begin  | 50 m/z     | Set End Plate Offset  | -500 V    | Set Dry Gas      | 4.0 l/min |
| Scan End    | 1500 m/z   | Set Collision Cell RF | 600.0 Vpp | Set Divert Valve | Source    |

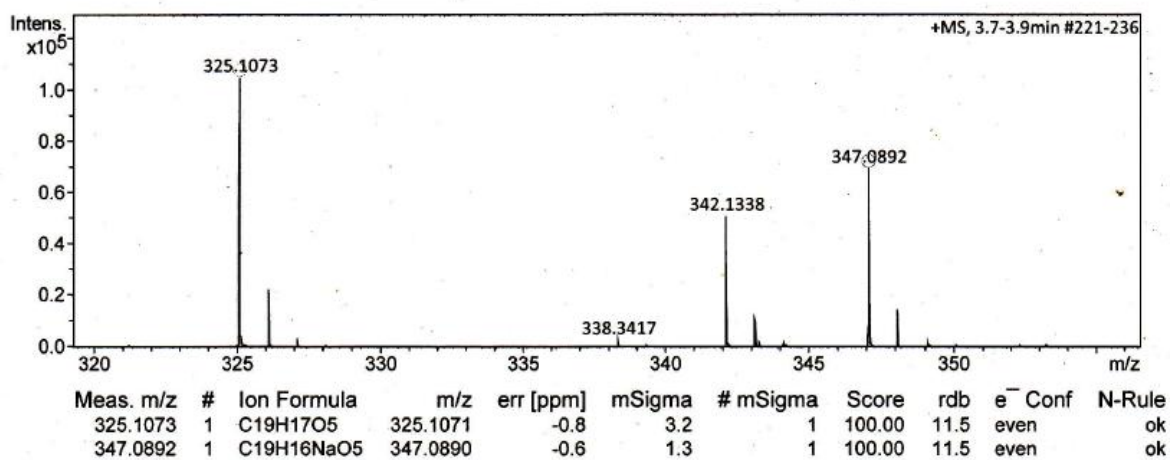

**Figure S98.** HRESIMS spectrum of compound **16**.

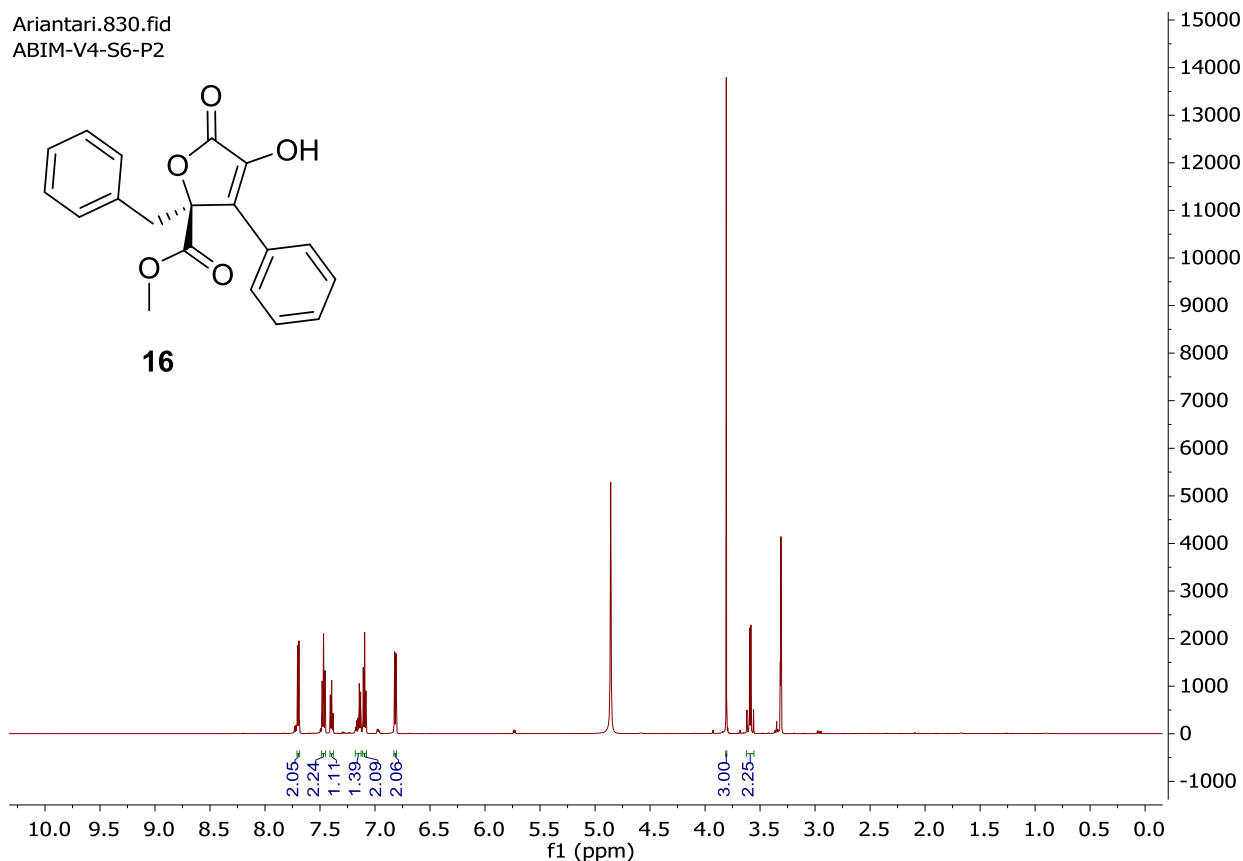

**Figure S99.** <sup>1</sup>H NMR (600 MHz, MeOH-*d*<sub>4</sub>) spectrum of compound **16**.

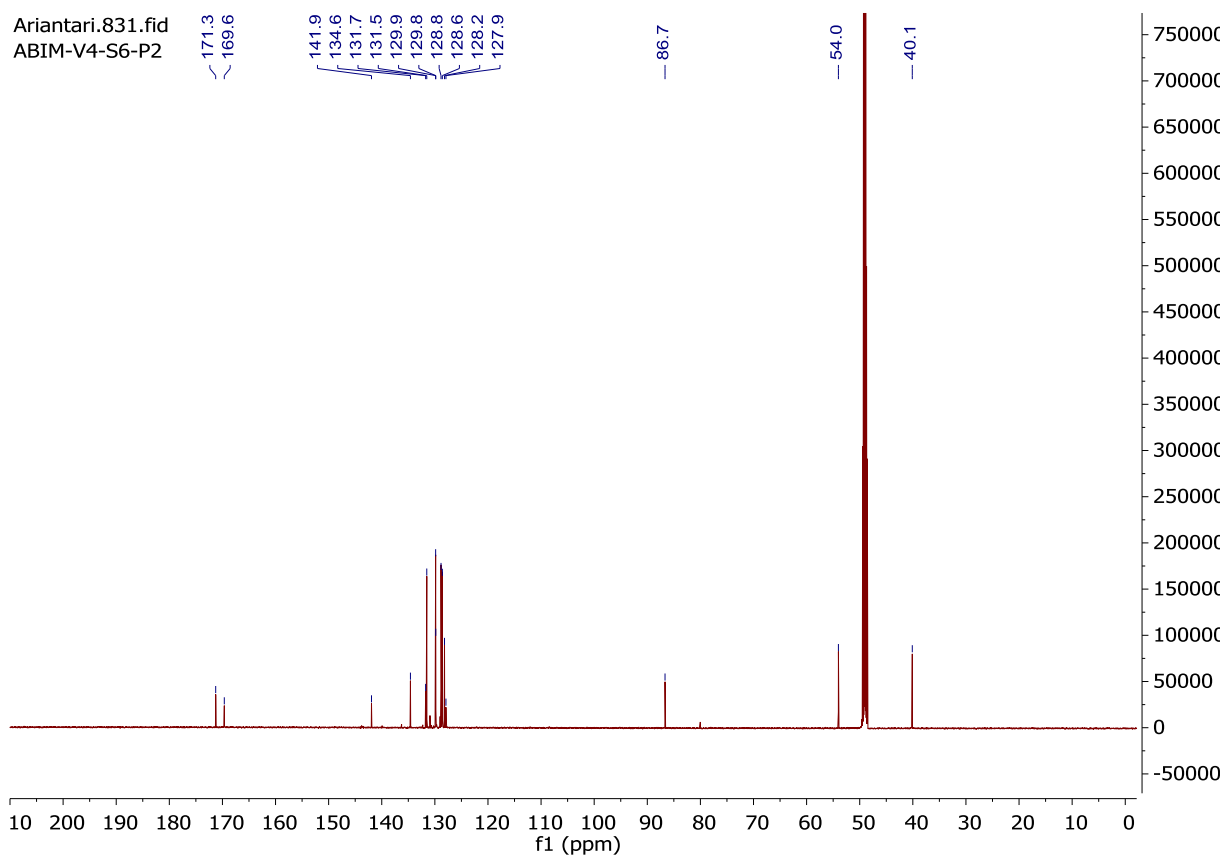

**Figure S100.**  $^{13}\text{C}$  NMR (150 MHz,  $\text{MeOH-}d_4$ ) spectrum of compound **16**.

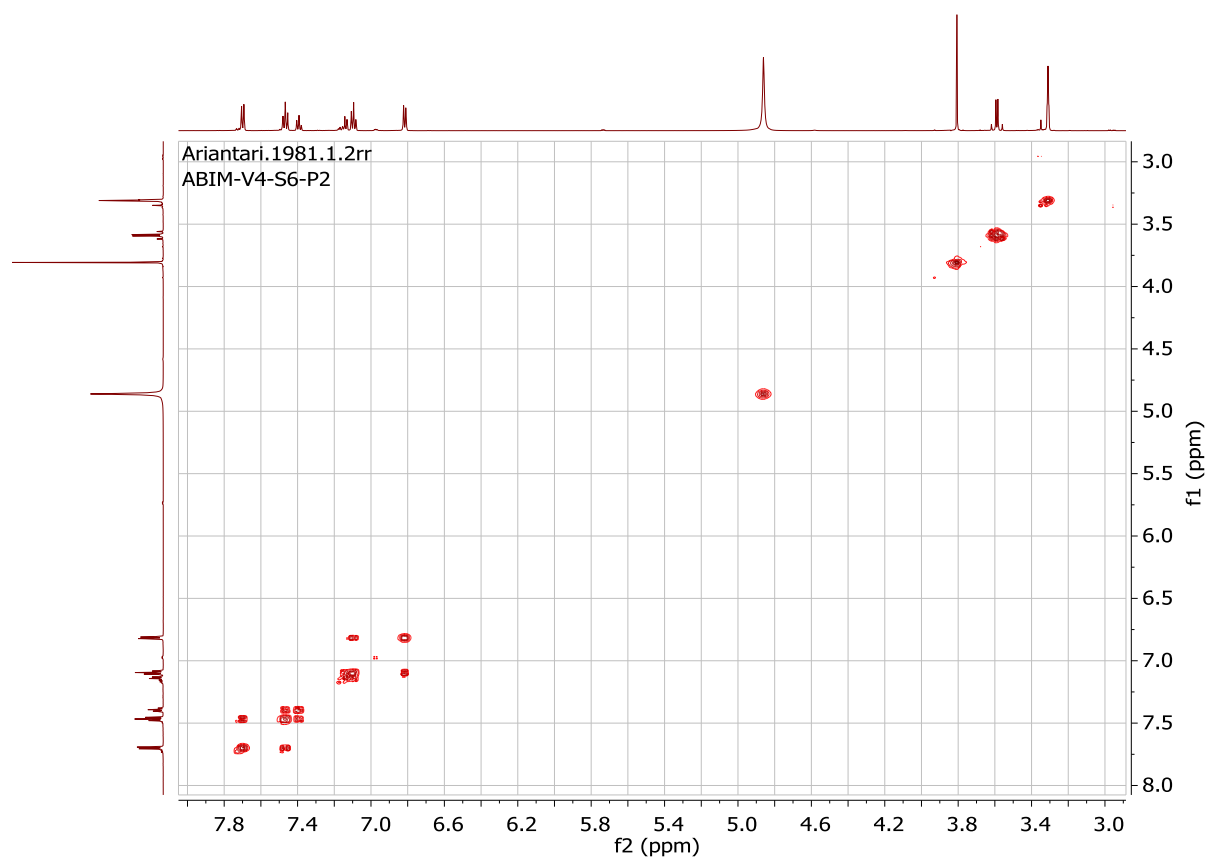

**Figure S101.**  $^1\text{H-}^1\text{H}$  COSY (600 MHz,  $\text{MeOH-}d_4$ ) spectrum of compound **16**.

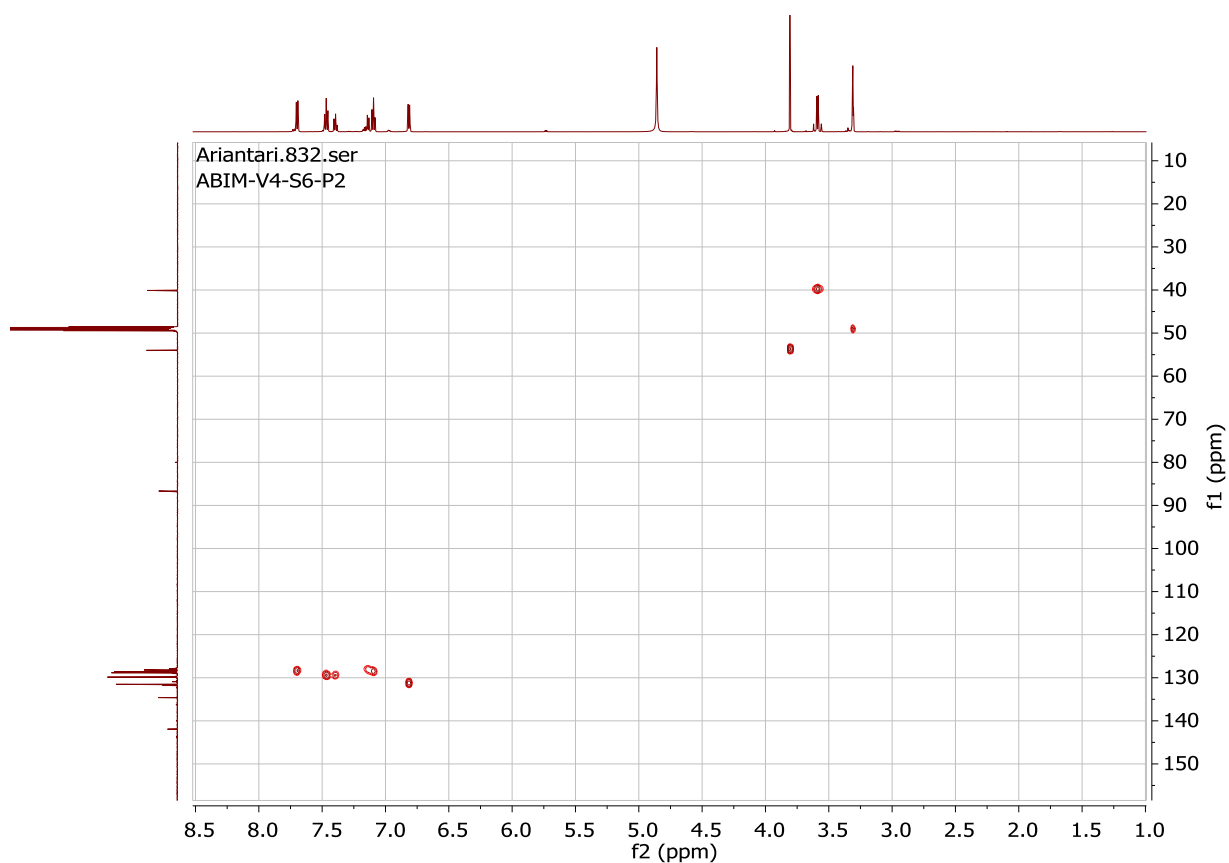

**Figure S102.** HSQC (600 and 150 MHz, MeOH- $d_4$ ) spectrum of compound **16**.

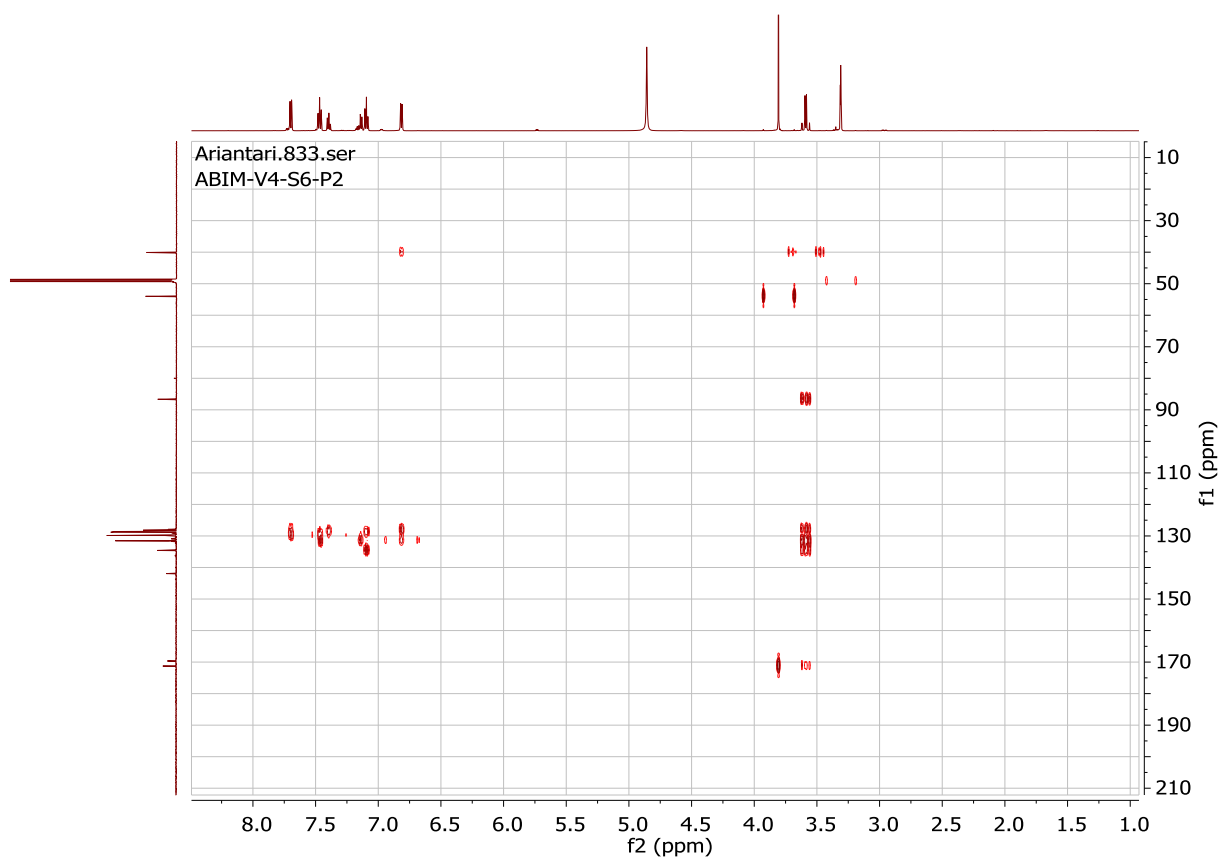

**Figure S103.** HMBC (600 and 150 MHz, MeOH- $d_4$ ) spectrum of compound **16**.



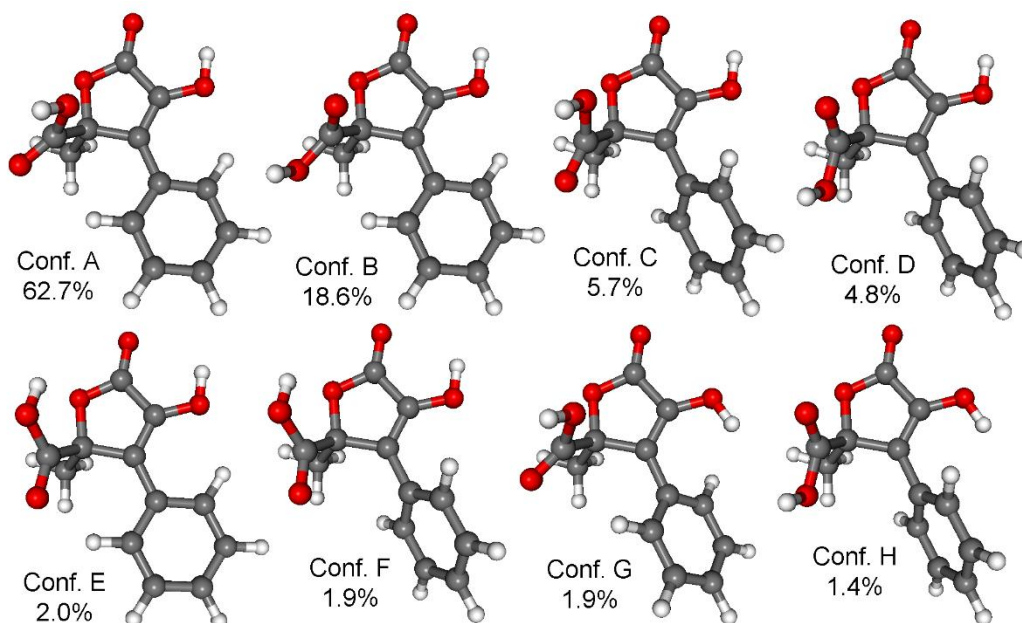

**Figure S104.** Structure and population of the low-energy CAM-B3LYP/TZVP PCM/MeCN conformers ( $\geq 1\%$ ) of (*S*)-**1**.

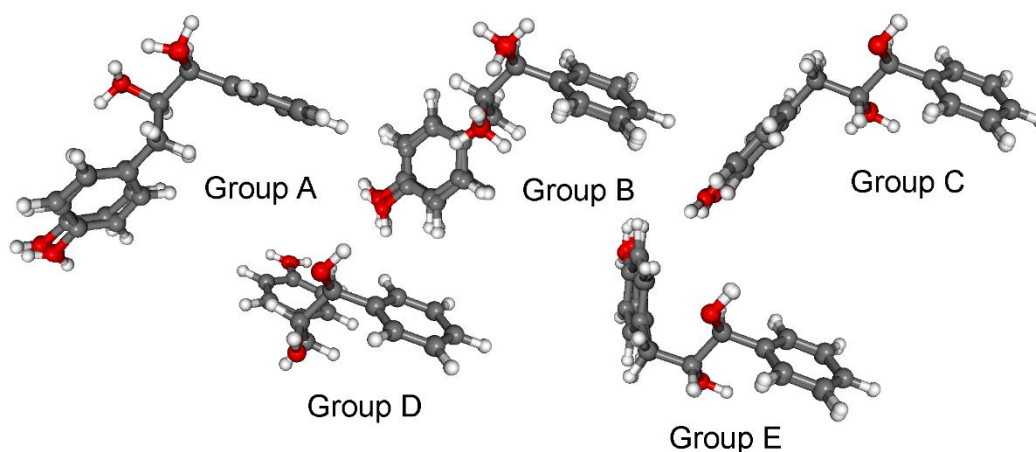

**Figure S105.** Classification of the twenty-two low-energy ( $\geq 1\%$ ) CAM-B3LYP/TZVP PCM/MeCN conformers of (*8R,9S*)-**4**. Group A (44.9%) contains conformers A, B, E, F; group B (27.5%) contains conformers C, D, G, H, K, L, Q, R; group C (10.1%) contains conformers I, J, M, N; group D (3.2%) contains conformers O, P; group E (4.4%) contains conformers S, T, U and V.

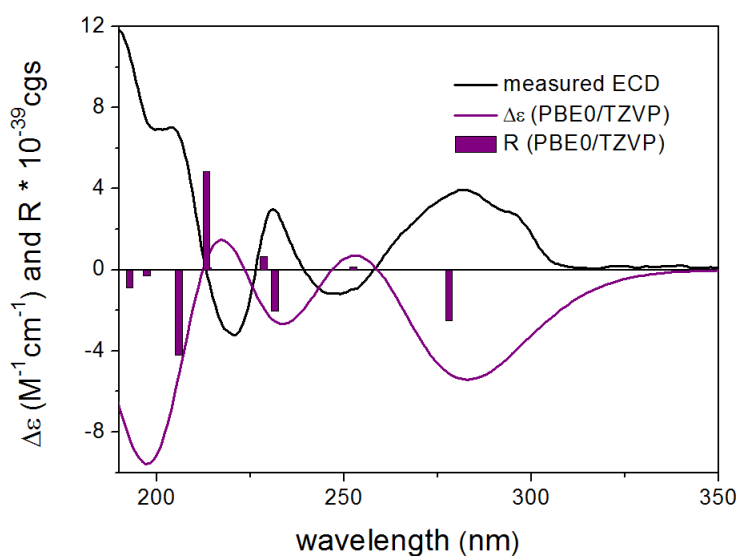

**Figure S106.** Experimental ECD spectrum (black) of **6** in MeCN compared with the Boltzmann-weighted PBE0/TZVP PCM/MeCN ECD spectrum (purple) of (*R*)-**6** computed for the 6 low-energy CAM-B3LYP/TZVP PCM/MeCN conformers. The bars represent the rotational strength of the lowest-energy conformer.

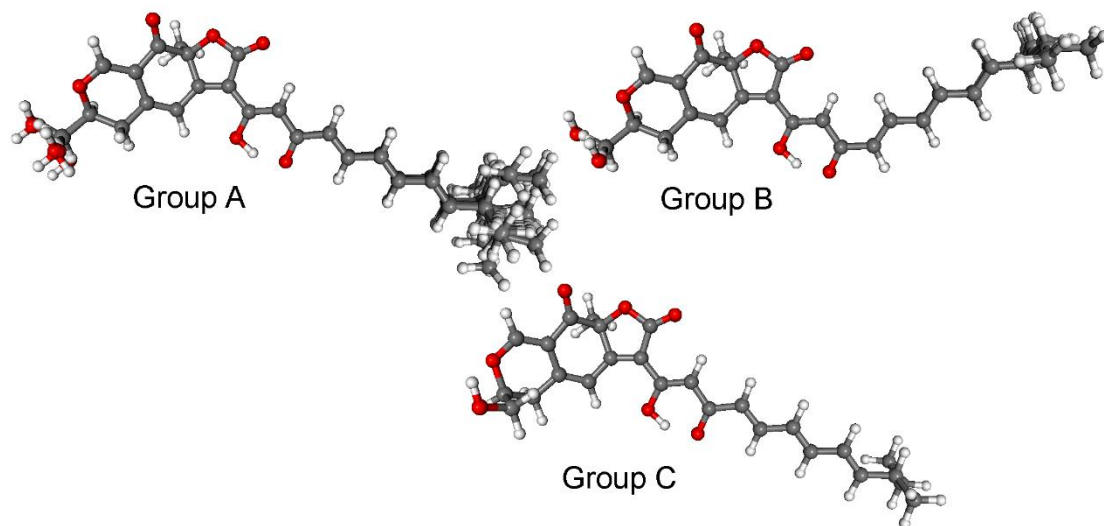

**Figure S107.** Classification of the twenty-six low-energy ( $\geq 1\%$ ) CAM-B3LYP/TZVP PCM/MeCN conformers of (3*S*,11*S*,23*S*)-**14** into conformer groups. Group A (72.5%) contains conformers A, B, C, D, E, F, G, I, J, K, M, N, O, Q, R, S, T, U, V, W, Y, Z; group B (5.0%) contains conformers H, L, X; group C (1.6%) contains conformer P.
